# Supplementary material for: Synthesis of oxindole fused 1,3-oxazepanes via hydride transfer initiated ring expansion of pyrrolidine
Source: Royal Society of Chemistry journal article supplement (doi:10.1039/d4qo00474d), 2024-01-01

## Supporting Information

### Synthesis of Oxindole Fused 1,3-Oxazepanes via Hydride Transfer

#### Initiated Ring Expansion of Pyrrolidine

Peng He,<sup>†</sup> Zongkang Wang,<sup>†</sup> Qiongwen Kang,<sup>†</sup> Nana Fei,<sup>†</sup> Chengyu Wang,<sup>\*‡</sup> and  
Yanzhong Li<sup>\*†</sup>

<sup>†</sup> School of Chemistry and Molecular Engineering, East China Normal University,  
500 Dongchuan Road, Shanghai, 200241, China

<sup>‡</sup> School of Chemistry and Chemical Engineering, Linyi University, Shuangling  
Road, Linyi, Shandong, 276000, China

E-mail: [yzli@chem.ecnu.edu.cn](mailto:yzli@chem.ecnu.edu.cn)

E-mail: [wangchengyu@lyu.edu.cn](mailto:wangchengyu@lyu.edu.cn)

## Table of Contents

|                                                                    |     |
|--------------------------------------------------------------------|-----|
| 1. General methods. ....                                           | S3  |
| 2. Synthesis of starting materials .....                           | S4  |
| 3. Synthesis of <b>2</b> .....                                     | S16 |
| 4. 1.0 mmol scale reaction for the preparation of <b>2a</b> .....  | S27 |
| 5. Mechanistic study by isotopically label.....                    | S28 |
| 6. Figure S1. Possible pathway to <sup>18</sup> O- <b>2a</b> ..... | S31 |
| 7. References.....                                                 | S31 |
| 8. Copies of spectra of products .....                             | S32 |
| 9. X-ray crystallography of compound <b>2a</b> .....               | S77 |

## 1. General methods

Unless noted, all commercial reagents were used without further purification. DCE is dried in calcium hydride and re-evaporated for use. THF and toluene are dried in sodium wire and re-evaporated for use. DMSO and DMF are re-evaporated for use. Reactions were monitored by thin layer chromatography. Purification of reaction products was carried out by flash chromatography on silica gel (200~300 mesh).  $^1\text{H}$  NMR spectra were recorded at 500 MHz or 600 MHz,  $^{13}\text{C}$  NMR spectra were recorded at 125 MHz or 150 MHz, and in  $\text{CDCl}_3$  or  $d^6$ -DMSO (containing 0.03% TMS) solutions.  $^1\text{H}$  NMR spectra were recorded with tetramethylsilane ( $\delta = 0.00$  ppm) as internal reference;  $^{13}\text{C}$  NMR spectra were recorded with  $\text{CDCl}_3$  ( $\delta = 77.00$  ppm) or  $d^6$ -DMSO ( $\delta = 39.52$  ppm) as internal reference. High-resolution mass spectra were performed on a mass spectrometer with a TOF (for EI or ESI) or FT-ICR (for MALDI) analyzer. Single crystal X-ray diffraction data was collected on a XtaLAB AFC11 (RCD3): quarter-chi single diffractometer with molybdenum cathodes.

The crystal preparation and measurement methods of **2a** as follows: Place 60.0 mg of **2a** in a 50 ml round bottom flask, dissolve **2a** with 4 mL of dichloromethane, then add 20 mL of petroleum ether and shake well, seal the flask with a sealing film, pierce a few holes, and let it stand still at room temperature until crystals precipitate out. The crystal was carefully picked out from the solvent with a spatula, and observed under a microscope to confirm that it was transparent for single crystal X-ray diffraction.

## 2. Synthesis of starting materials

### 2.1 General Procedure for the Preparation of Yrones 1.

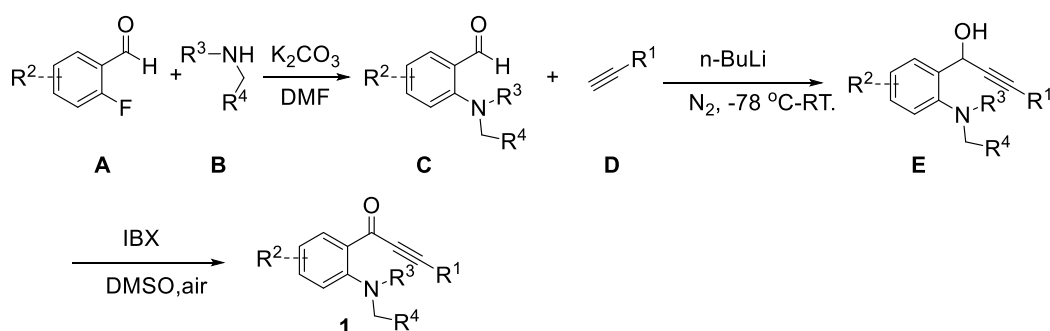

Potassium carbonate (12.0 mmol, 1.2 equiv, 1.658 g) and amines **B** (12.0 mmol, 1.2 equiv) were added to a solution of the required o-fluorobenzaldehydes **A** (10.0 mmol, 1.0 equiv) in dimethylformamide (20 mL). The reaction mixture was heated to reflux for 3–6 h and then left to cool down to room temperature before being diluted with water. The aqueous layer was extracted with chloroform, and the organic layer was washed with water, dried over anhydrous  $MgSO_4$ , and evaporated in vacuo. The resulting oil was then eluted with 5% EtOAc in petrol through a silica plug to give the desired o-aminobenzaldehydes **C**.<sup>1</sup> To a solution of **C** (3.0 mmol, 1.0 equiv) in anhydrous THF (10 mL) was added  $n-BuLi$  (2.5 M in hexane, 3.6 mmol, 1.2 equiv) at  $-78\text{ }^\circ\text{C}$  under  $N_2$  atmosphere. The reaction was stirred at  $-78\text{ }^\circ\text{C}$  for 1 h. **D** (3.9 mmol, 1.3 equiv) was added to the mixture, which was warmed up to room temperature gradually, and was stirred for an additional hour before being quenched with aqueous  $NH_4Cl$ . After extracting with ethyl acetate ( $3 \times 20\text{ mL}$ ), combined organic phases was washed with water and brine, dried over anhydrous  $MgSO_4$ . After filtration of  $MgSO_4$ , the filtrate was concentrated under reduced pressure to give the desired alcohol **E**. Without purification, **E** was added to a solution of IBX (3.6 mmol, 1.2 equiv, 1.008 g) in DMSO (10 mL) and the solution was heated to  $35\text{ }^\circ\text{C}$  (oil bath). for 1 h. The cooled reaction mixture was diluted with EtOAc (70 mL) and water (20 mL) and stirred vigorously for 10 min. Then it was filtered over celite. The organic layer was separated and the aqueous phase was extracted with DCM ( $3 \times 10\text{ mL}$ ). The combined extracts were sequentially washed with aq. sat.  $NaHCO_3$  (10 mL) and NaCl solutions (10 mL),



dried ( $\text{Na}_2\text{SO}_4$ ) and evaporated in vacuo. The residue was subject to flash chromatography on silica gel (petroleum ether/ethyl acetate, 20:1) to afford pure alkynones **1**.

## 2.2 General procedure for the synthesis of deuterated 1-(2-(pyrrolidin-1-yl-2,2,5,5-d<sub>4</sub>)phenyl)-3-(o-tolyl)prop-2-yn-1-one [D]-1d.

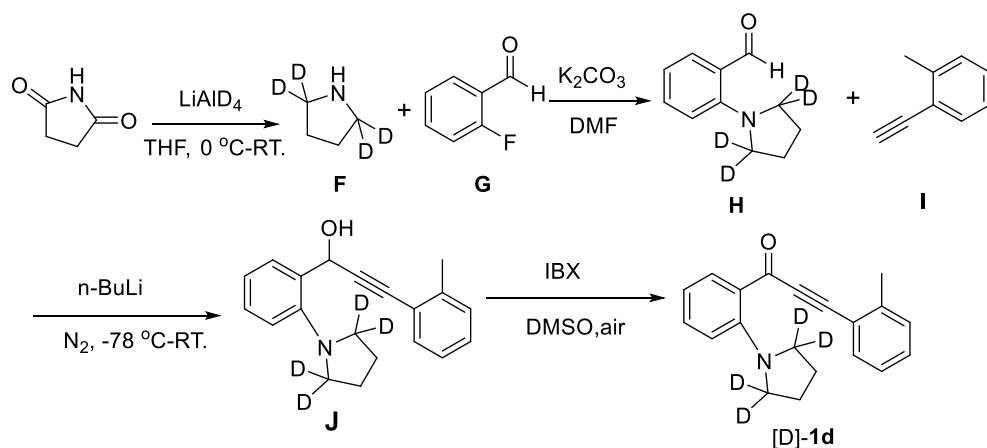

To a solution of pyrrolidine-2,5-dione (3.6 mmol, 357.0 mg) in THF (15 mL) was added  $\text{LiAlD}_4$  (18 mmol, 756.0 mg) in portions in ice bath (0 °C). After stirring at 40 °C in oil bath for 12 h,  $\text{Na}_2\text{SO}_4 \cdot 10\text{H}_2\text{O}$  was added until no bubbles appeared. Then DMF (15 mL),  $\text{K}_2\text{CO}_3$  (4.5 mmol, 622.0 mg), and 2-fluorobenzaldehyde (3 mmol, 372.0 mg) were added in sequence. The mixture was heated to 120 °C in oil bath and monitored by TLC. After the consumption of 2-fluorobenzaldehyde, the mixture was cooled to room temperature and diluted with water (40 mL), and extracted with EtOAc (3 x 30 mL). The combined extracts were washed with brine (3 x 30 mL), dried by anhydrous  $\text{Na}_2\text{SO}_4$ , filtered, and concentrated under reduced pressure and the residue was purified by flash column chromatography (eluent: EtOAc: petroleum ether, 1:20) to afford the deuterated substrate **H** as colorless oil in 76% yield (408 mg). To a solution of **H** (2.5 mmol, 1.0 equiv, 447.8 mg) in anhydrous THF (10 mL) was added  $n\text{-BuLi}$  (2.5 M in hexane, 3.0 mmol, 1.2 equiv) at -78 °C under  $\text{N}_2$  atmosphere. The reaction was stirred at -78 °C for 1 h. **I** (3.25 mmol, 1.3 equiv, 377.2 mg) was added to the mixture, which was warmed up to room temperature gradually, and was stirred for an additional hour before being quenched with aqueous  $\text{NH}_4\text{Cl}$ . After extracting with ethyl acetate (3 x 20

mL), combined organic phases was washed with water and brine, dried over anhydrous MgSO<sub>4</sub>. After filtration of MgSO<sub>4</sub>, the filtrate was concentrated under reduced pressure to give the desired alcohol **J**. Without purification, **J** was added to a solution of IBX (3.0 mmol, 1.2 equiv, 840.0 g) in DMSO (10 mL) and the solution was heated to 35 °C (oil bath). for 1 h. The cooled reaction mixture was diluted with EtOAc (70 mL) and water (20 mL) and stirred vigorously for 10 min. Then it was filtered over celite. The organic layer was separated and the aqueous phase was extracted with DCM (3x10 mL). The combined extracts were sequentially washed with aq. sat. NaHCO<sub>3</sub> (10 mL) and NaCl solutions (10 mL), dried (Na<sub>2</sub>SO<sub>4</sub>) and evaporated in vacuo. The residue was subject to flash chromatography on silica gel (petroleum ether/ethyl acetate, 20:1) to afford pure alkynones [D]-**1d**. as yellow oil in 55% yield (403.2 mg).

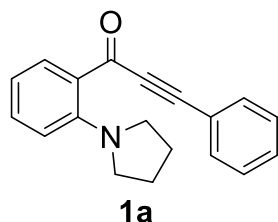

**3-phenyl-1-(2-(pyrrolidin-1-yl)phenyl)prop-2-yn-1-one (1a)**. Yellow solid, purified by chromatography on silica gel (petroleum ether/ethyl acetate = 20:1); yield: 50%, 412.70 mg, m.p. 71-73 °C. <sup>1</sup>H NMR (500 MHz, CDCl<sub>3</sub>) δ 8.20-8.15 (m, 1H), 7.67-7.60 (m, 2H), 7.50-7.35 (m, 4H), 6.89-6.83 (m, 1H), 6.86 (d, *J* = 8.0 Hz, 1H), 3.24-3.19 (m, 4H), 2.02-1.95 (m, 4H). <sup>13</sup>C NMR (125 MHz, CDCl<sub>3</sub>) δ 176.6, 148.3, 133.4, 133.2, 132.8, 130.2, 128.5, 123.8, 120.7, 115.2, 114.3, 90.8, 88.7, 52.0, 25.9. HRMS (ESI) *m/z*: [M+H]<sup>+</sup> calcd for C<sub>19</sub>H<sub>18</sub>NO: 276.1383, found 276.1385.

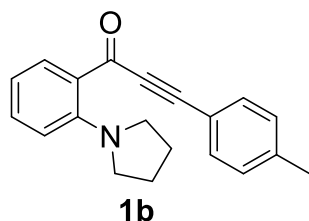

**1-(2-(pyrrolidin-1-yl)phenyl)-3-(p-tolyl)prop-2-yn-1-one (1b)**. Yellow solid, purified

by chromatography on silica gel (petroleum ether/ethyl acetate = 20:1); yield: 75%, 648.0 mg, m.p. 119-121 °C. <sup>1</sup>H NMR (500 MHz, CDCl<sub>3</sub>) δ 8.18-8.14 (m, 1H), 7.53 (d, *J*=8.0 Hz, 2H), 7.41-7.36 (m, 1H), 7.20 (d, *J*=8.0 Hz, 2H), 6.85 (d, *J*=8.0 Hz, 1H), 6.81-6.76 (m, 1H), 3.24-3.19 (m, 4H), 2.39 (s, 3H), 2.00-1.95 (m, 4H). <sup>13</sup>C NMR (125 MHz, CDCl<sub>3</sub>) δ 176.9, 148.3, 140.8, 133.3, 133.2, 132.9, 129.3, 124.0, 117.6, 115.1, 114.3, 91.4, 88.5, 52.0, 25.9, 21.7. HRMS (ESI) *m/z*: [M+H]<sup>+</sup> calcd for C<sub>20</sub>H<sub>20</sub>NO 290.1539, found 290.1539.

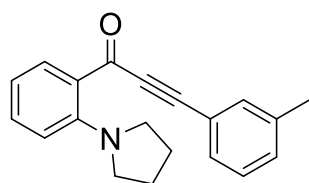

**1c**

**1-(2-(pyrrolidin-1-yl)phenyl)-3-(m-tolyl)prop-2-yn-1-one (2c).** Yellow solid, purified by chromatography on silica gel (petroleum ether/ethyl acetate =20:1); yield: 48%, 416.0 mg, m.p. 115-117 °C. <sup>1</sup>H NMR (500 MHz, CDCl<sub>3</sub>) δ 8.20-8.14 (m, 1H), 7.47-7.43 (m, 2H), 7.42-7.35 (m 1H), 7.32-7.22 (m, 2H), 6.85(d, *J*=8.5 Hz, 1H), 6.81-6.75 (m, 1H), 3.24-3.18 (m, 4H), 2.37(s, 3H), 2.02-1.96 (m, 4H). <sup>13</sup>C NMR (125 MHz, CDCl<sub>3</sub>) δ 176.7, 148.3, 138.3, 133.33, 133.31, 133.2, 131.1, 129.9, 128.4, 123.9, 120.5, 115.1, 114.3, 91.1, 88.4, 52.0, 25.9, 21.2. HRMS (ESI) *m/z*: [M+H]<sup>+</sup> calcd for C<sub>20</sub>H<sub>20</sub>NO 290.1539, found 290.1537.

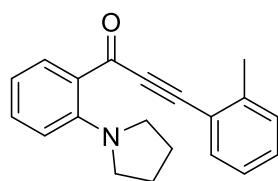

**1d**

**1-(2-(pyrrolidin-1-yl)phenyl)-3-(o-tolyl)prop-2-yn-1-one (1d).** Yellow oil, purified by chromatography on silica gel (petroleum ether/ethyl acetate = 20:1); yield: 58%, 503.1 mg. <sup>1</sup>H NMR (500 MHz, CDCl<sub>3</sub>) δ 8.18-8.14 (m, 1H), 7.53 (d, *J*=8 Hz, 2H), 7.42-7.36 (m, 1H), 7.20 (d, *J*=8.0 Hz, 2H), 6.85 (d, *J*=7.5 Hz, 1H), 6.81-6.76 (m, 1H), 3.24-3.19

(m, 4H), 2.39 (s, 3 H), 2.00-1.90 (m, 4H).  $^{13}\text{C}$  NMR (125 MHz,  $\text{CDCl}_3$ )  $\delta$  176.8, 148.3, 141.9, 133.4, 133.3, 133.1, 130.3, 129.7, 125.8, 124.1, 120.6, 115.1, 114.3, 92.6, 89.9, 52.0, 25.9, 20.8. HRMS (ESI)  $m/z$ :  $[\text{M}+\text{H}]^+$  calcd for  $\text{C}_{20}\text{H}_{20}\text{NO}$  290.1539, found 290.1542.

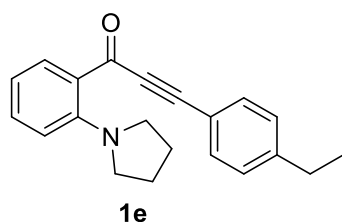

**3-(4-ethylphenyl)-1-(2-(pyrrolidin-1-yl)phenyl)prop-2-yn-1-one (1e).** Yellow solid, purified by chromatography on silica gel (petroleum ether/ethyl acetate = 20:1); yield: 55%, 498.7 mg, m.p. 80-82 °C.  $^1\text{H}$  NMR (500 MHz,  $\text{CDCl}_3$ )  $\delta$  8.18-8.14 (m, 1H), 7.58-7.54 (m, 2H), 7.41-7.36 (m, 1H), 7.22 (d,  $J = 8.0$  Hz, 2H), 6.85 (d,  $J = 7.5$  Hz, 1H), 6.80-6.76 (m, 1H) 3.23-3.19 (m, 4H) 2.68 (q,  $J = 7.5$  Hz, 2H), 2.00-1.96 (m, 4H), 1.25 (t,  $J = 7.5$  Hz, 3H).  $^{13}\text{C}$  NMR (125 MHz,  $\text{CDCl}_3$ )  $\delta$  176.9, 148.3, 147.1, 133.25, 133.16, 133.0, 128.1, 124.0, 117.8, 115.1, 114.3, 91.5, 88.5, 52.0, 29.0, 25.9, 15.2. HRMS (ESI)  $m/z$ :  $[\text{M}+\text{H}]^+$  calcd for  $\text{C}_{21}\text{H}_{22}\text{NO}$  304.1696, found 304.1697.

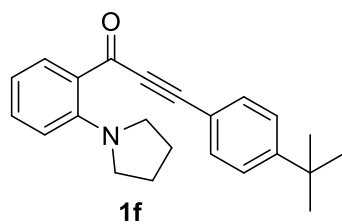

**3-(4-(tert-butyl)phenyl)-1-(2-(pyrrolidin-1-yl)phenyl)prop-2-yn-1-one (1f).** Yellow oil, purified by chromatography on silica gel (petroleum ether/ethyl acetate = 20:1); yield: 61%, 607.7 mg.  $^1\text{H}$  NMR (500 MHz,  $\text{CDCl}_3$ )  $\delta$  8.18-8.14 (m, 1H), 7.60-7.55 (m, 2H), 7.44-7.36 (m, 3H), 6.86 (d,  $J = 7.5$  Hz, 1H), 6.82-6.75 (m, 1H), 3.24-3.20 (m, 4H), 2.00-1.95 (m, 4H), 1.33 (s, 9H).  $^{13}\text{C}$  NMR (125 MHz,  $\text{CDCl}_3$ )  $\delta$  177.0, 153.9, 148.3, 133.3, 133.2, 132.7, 125.6, 124.0, 117.6, 115.1, 114.3, 91.4, 88.5, 52.0, 35.0, 31.1, 25.9. HRMS (ESI)  $m/z$ :  $[\text{M}+\text{H}]^+$  calcd for  $\text{C}_{23}\text{H}_{26}\text{NO}$  332.2009, found 332.2006.

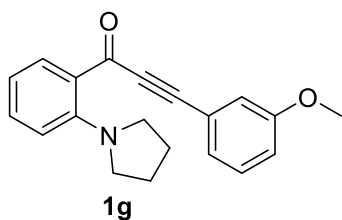

**3-(3-methoxyphenyl)-1-(2-(pyrrolidin-1-yl)phenyl)prop-2-yn-1-one (2g).** Yellow oil, purified by chromatography on silica gel (petroleum ether/ethyl acetate = 20:1); yield: 42%, 384.5 mg.  $^1\text{H}$  NMR (500 MHz,  $\text{CDCl}_3$ )  $\delta$  8.18-8.16 (m, 1H), 7.42-7.37 (m, 1H), 7.32-7.27 (m, 1H), 7.26-7.22 (m, 1H), 7.17-7.14 (m, 1H), 7.02-6.97 (m, 1H), 6.86 (d,  $J$  = 7.5 Hz, 1H), 6.82-6.76 (m, 1H), 3.83 (s, 3H), 3.23-3.20 (m, 4H), 2.02-1.96 (m, 4H).  $^{13}\text{C}$  NMR (125 MHz,  $\text{CDCl}_3$ )  $\delta$  176.6, 159.4, 148.4, 133.4, 133.2, 129.6, 125.3, 123.8, 121.7, 117.3, 117.1, 115.2, 114.3, 90.7, 88.4, 55.4, 52.0, 25.9. HRMS (ESI)  $m/z$ :  $[\text{M}+\text{H}]^+$  calcd for  $\text{C}_{20}\text{H}_{20}\text{NO}$  306.1489, found 306.1486.

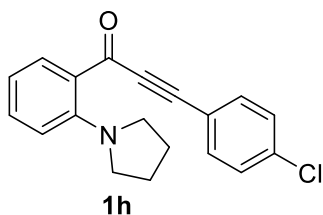

**3-(4-chlorophenyl)-1-(2-(pyrrolidin-1-yl)phenyl)prop-2-yn-1-one (2h).** Yellow solid, purified by chromatography on silica gel (petroleum ether/ethyl acetate = 20:1); yield: 67%, 624.0 mg, m.p. 84-86 °C.  $^1\text{H}$  NMR (500 MHz,  $\text{CDCl}_3$ )  $\delta$  8.16-8.12 (m, 1H), 7.59-7.54 (m, 2H), 7.42-7.35 (m, 3H), 6.87 (d,  $J$  = 8.0 Hz, 1H), 6.81-6.76 (m, 1H), 3.24-3.18 (m, 4H), 2.00-1.96 (m, 4H).  $^{13}\text{C}$  NMR (125 MHz,  $\text{CDCl}_3$ )  $\delta$  176.2, 148.4, 136.5, 134.0, 133.5, 133.2, 129.0, 123.5, 119.3, 115.2, 114.4, 89.4, 89.3, 52.1, 25.9. HRMS (ESI)  $m/z$ :  $[\text{M}+\text{H}]^+$  calcd for  $\text{C}_{19}\text{H}_{17}\text{ClNO}$  310.0993, found 310.0997.

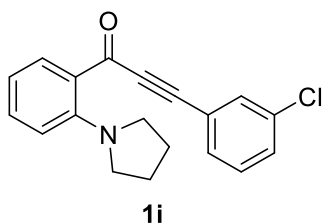

**3-(3-chlorophenyl)-1-(2-(pyrrolidin-1-yl)phenyl)prop-2-yn-1-one (1i).** Yellow solid, purified by chromatography on silica gel (petroleum ether/ethyl acetate = 20:1); yield: 45%, 417.0 mg, m.p. 89-91 °C. <sup>1</sup>H NMR (500 MHz, CDCl<sub>3</sub>) δ 8.16-8.12 (m, 1H), 7.63-7.31 (m, 1H), 7.54-7.50 (m, 1H), 7.43-7.38 (m, 2H), 7.36-7.31 (m, 1H), 6.87 (d, *J* = 8.5 Hz, 1H), 6.81-6.77 (m, 1H), 3.24-3.19 (m, 4H), 2.01-1.97 (m, 4H). <sup>13</sup>C NMR (125 MHz, CDCl<sub>3</sub>) δ 176.0, 148.5, 134.4, 133.6, 133.3, 132.4, 130.9, 130.4, 129.8, 123.5, 122.5, 115.2, 114.4, 89.2, 88.7, 52.1, 25.9. HRMS (ESI) *m/z*: [M+H]<sup>+</sup> calcd for C<sub>19</sub>H<sub>17</sub>ClNO 310.0993, found 310.0995.

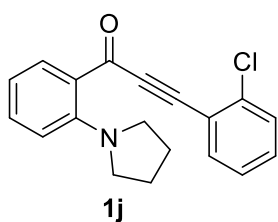

**3-(2-chlorophenyl)-1-(2-(pyrrolidin-1-yl)phenyl)prop-2-yn-1-one (1j).** yellow oil, purified by chromatography on silica gel (petroleum ether/ethyl acetate = 20:1); yield: 44%, 407.8 mg. <sup>1</sup>H NMR (500 MHz, CDCl<sub>3</sub>) δ 8.32-8.28 (m, 1H), 7.67-7.66 (m, 1H) 7.48-7.44 (m, 1H), 7.42-7.34 (m, 2H), 7.31-7.27 (m, 1H), 6.86 (d, *J* = 8.0 Hz, 1H), 6.82-6.77 (m, 1H), 3.24-3.20 (m, 4H), 2.05-1.95 (m, 4H). <sup>13</sup>C NMR (125 MHz, CDCl<sub>3</sub>) δ 176.0, 148.5, 137.2, 134.6, 133.7, 133.6, 131.1, 129.5, 126.7, 123.6, 121.0, 115.3, 114.3, 92.8, 86.8, 52.1, 25.9. HRMS (ESI) *m/z*: [M+H]<sup>+</sup> calcd for C<sub>19</sub>H<sub>17</sub>ClNO 310.0993, found 310.0996.

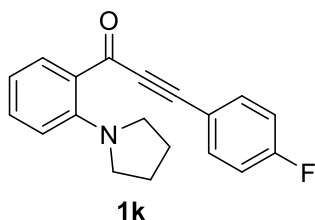

**3-(4-fluorophenyl)-1-(2-(pyrrolidin-1-yl)phenyl)prop-2-yn-1-one (1k).** Yellow solid, purified by chromatography on silica gel (petroleum ether/ethyl acetate = 20:1); yield: 64%, 562.9 mg, m.p. 88-90 °C. <sup>1</sup>H NMR (500 MHz, CDCl<sub>3</sub>) δ 8.16-8.13 (m, 1H), 7.67-7.60 (m, 2H), 7.42-7.36 (m, 1H), 7.12-7.06 (m, 2H), 6.86 (d, *J* = 7.5 Hz, 1H), 6.81-6.75

(m, 1H), 3.23-3.19 (m, 4H), 2.00-1.96 (m, 4H).  $^{13}\text{C}$  NMR (125 MHz,  $\text{CDCl}_3$ )  $\delta$  176.4, 163.7 (d,  $J = 251.4$  Hz), 148.4, 134.6 (d,  $J = 8.8$  Hz), 113.4, 133.2, 123.7, 116.9 (d,  $J = 3.5$  Hz), 116.0 (d,  $J = 22.3$  Hz), 115.2, 114.4, 89.7, 88.5, 52.0, 25.9. HRMS (ESI)  $m/z$ :  $[\text{M}+\text{H}]^+$  calcd for  $\text{C}_{19}\text{H}_{17}\text{FNO}$  294.1289, found 294.1287.

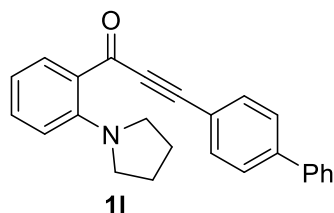

**3-((1,1'-biphenyl)-4-yl)-1-(2-(pyrrolidin-1-yl)phenyl)prop-2-yn-1-one (1l).** Yellow oil, purified by chromatography on silica gel (petroleum ether/ethyl acetate = 20:1); yield: 45%, 476.0 mg.  $^1\text{H}$  NMR (500 MHz,  $\text{CDCl}_3$ )  $\delta$  8.21-8.18 (m, 1H), 7.73-7.69 (m, 2H), 7.65-7.59 (m, 4H), 7.49-7.44 (m, 2H), 7.41-7.37 (m, 2H), 6.87 (d,  $J = 8.0$  Hz, 1H), 6.82-6.78 (m, 1H), 3.25-3.21 (m, 4H), 2.01-1.97 (m, 4H).  $^{13}\text{C}$  NMR (125 MHz,  $\text{CDCl}_3$ )  $\delta$  176.6, 148.4, 143.0, 139.9, 133.4, 133.3, 133.2, 128.9, 128.0, 127.2, 127.1, 123.8, 119.5, 115.2, 114.3, 90.8, 89.4, 52.1, 25.9. HRMS (ESI)  $m/z$ :  $[\text{M}+\text{H}]^+$  calcd for  $\text{C}_{25}\text{H}_{22}\text{NO}$  352.1696, found 352.1699.

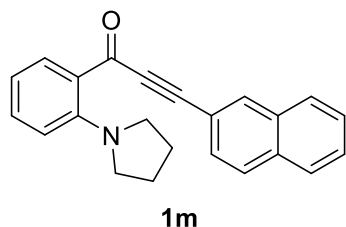

**3-(naphthalen-2-yl)-1-(2-(pyrrolidin-1-yl)phenyl)prop-2-yn-1-one (1m).** Yellow solid, purified by chromatography on silica gel (petroleum ether/ethyl acetate = 20:1); yield: 42%, 409.6 mg, m.p. 104-106 °C.  $^1\text{H}$  NMR (500 MHz,  $\text{CDCl}_3$ )  $\delta$  8.25-8.19 (m, 2H), 7.90-7.83 (m, 3H), 7.67-7.62 (m, 1H), 7.59-7.51 (m, 2H), 7.43-7.38 (m, 1H), 6.87 (d,  $J = 7.5$  Hz, 1H), 6.84-6.79 (m, 1H), 3.26-3.22 (m, 4H), 2.01-1.97 (m, 4H).  $^{13}\text{C}$  NMR (125 MHz,  $\text{CDCl}_3$ )  $\delta$  176.6, 148.4, 133.8, 133.7, 133.4, 133.3, 132.7, 128.5, 128.3, 128.1, 127.9, 127.7, 126.9, 123.9, 118.0, 115.2, 114.3, 91.3, 89.0, 52.1, 25.9. HRMS (ESI)  $m/z$ :  $[\text{M}+\text{H}]^+$  calcd for  $\text{C}_{23}\text{H}_{20}\text{NO}$  326.1539, found 326.1530.

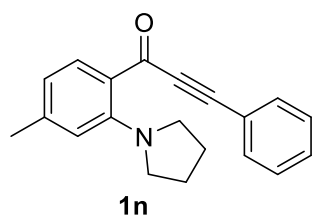

**1-(4-methyl-2-(pyrrolidin-1-yl)phenyl)-3-phenylprop-2-yn-1-one (1n).** Yellow solid, purified by chromatography on silica gel (petroleum ether/ethyl acetate = 20:1); yield: 49%, 421.1 mg, m.p. 118-120 °C.. <sup>1</sup>H NMR (500 MHz, CDCl<sub>3</sub>) δ 8.08 (d, *J* = 8.0 Hz, 1H), 7.65-7.62 (m, 2H), 7.44-7.36 (m, 3H), 6.66 (s, 1H), 6.63-6.60 (m, 1H), 3.24-3.21 (m, 4H), 2.37 (s, 3H), 2.00-1.96 (m, 4H). <sup>13</sup>C NMR (125 MHz, CDCl<sub>3</sub>) δ 175.9, 148.7, 144.3, 133.6, 132.8, 130.1, 128.5, 121.8, 120.9, 116.7, 114.5, 90.2, 88.8, 52.0, 25.9, 22.1. HRMS (ESI) *m/z*: [M+H]<sup>+</sup> calcd for C<sub>20</sub>H<sub>20</sub>NO 290.1539, found 290.1542.

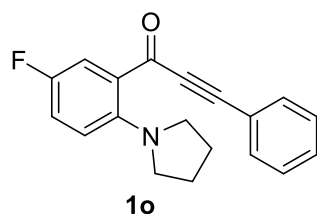

**1-(5-fluoro-2-(pyrrolidin-1-yl)phenyl)-3-phenylprop-2-yn-1-one (1o).** Yellow oil, purified by chromatography on silica gel (petroleum ether/ethyl acetate = 20:1); yield: 76%, 668.1 mg. <sup>1</sup>H NMR (500 MHz, CDCl<sub>3</sub>) δ 7.88-7.83 (m, 1H), 7.67-7.63 (m, 2H), 7.48-7.38 (m, 3H), 7.19-7.14 (m, 1H), 6.84-6.80 (m, 1H), 3.20-3.17 (m, 4H), 2.01-1.97 (m, 4H). <sup>13</sup>C NMR (125 MHz, CDCl<sub>3</sub>) δ 175.6, 153.5 (d, *J* = 233.8 Hz), 145.4, 132.9, 130.5, 128.6, 123.4 (d, *J* = 5.3 Hz), 121.2 (d, *J* = 23.1 Hz), 120.4, 117.8 (d, *J* = 22.9 Hz), 115.5 (d, *J* = 7.0 Hz), 91.4, 88.2, 52.3, 25.9. HRMS (ESI) *m/z*: [M+H]<sup>+</sup> calcd for C<sub>19</sub>H<sub>17</sub>FNO 294.1289, found 294.1279.



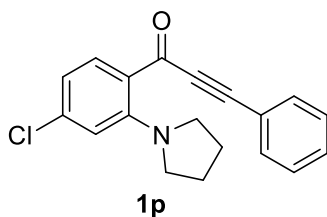

**1-(4-chloro-2-(pyrrolidin-1-yl)phenyl)-3-phenylprop-2-yn-1-one (1p).** Yellow solid, purified by chromatography on silica gel (petroleum ether/ethyl acetate = 20:1); yield: 76%, 704.5 mg, m.p. 72-76 °C. <sup>1</sup>H NMR (500 MHz, CDCl<sub>3</sub>) δ 8.08 (d, *J* = 8.5 Hz, 1H), 7.65-7.62 (m, 2H), 7.46-7.38 (m, 3H), 6.84 (d, *J* = 2.0 Hz, 1H), 6.76-6.72 (m, 1H), 3.22-3.19 (m, 4H), 2.01-1.97 (m, 4H). <sup>13</sup>C NMR (125 MHz, CDCl<sub>3</sub>) δ 175.6, 148.9, 139.6, 134.5, 132.9, 130.4, 128.6, 122.4, 120.5, 115.5, 114.0, 91.2, 88.3, 52.1, 25.9. HRMS (ESI) *m/z*: [M+H]<sup>+</sup> calcd for C<sub>19</sub>H<sub>17</sub>ClNO 310.0993, found 310.0989.

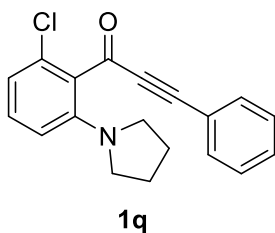

**1-(2-chloro-6-(pyrrolidin-1-yl)phenyl)-3-phenylprop-2-yn-1-one (1q).** Yellow solid, purified by chromatography on silica gel (petroleum ether/ethyl acetate = 20:1); yield: 70%, 648.9 mg, m.p. 75-77 °C. <sup>1</sup>H NMR (500 MHz, CDCl<sub>3</sub>) δ 7.61-7.57 (m, 2H), 7.47-7.42 (m, 1H), 7.40-7.36 (m, 2H), 7.19-7.14 (m, 1H), 6.76-6.73 (m, 1H), 6.68-6.65 (m, 1H), 3.30-3.26 (m, 4H), 1.97-1.93 (m, 4H). <sup>13</sup>C NMR (125 MHz, CDCl<sub>3</sub>) δ 180.5, 147.5, 133.1, 132.1, 130.8, 130.7, 128.6, 124.1, 120.4, 117.4, 112.8, 94.5, 90.0, 51.3, 25.9. HRMS (ESI) *m/z*: [M+H]<sup>+</sup> calcd for C<sub>19</sub>H<sub>17</sub>ClNO 310.0993 found 310.0986.

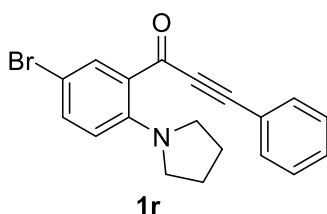

**1-(5-bromo-2-(pyrrolidin-1-yl)phenyl)-3-phenylprop-2-yn-1-one (1r).** Yellow oil, purified by chromatography on silica gel (petroleum ether/ethyl acetate = 20:1); yield:

66%, 700.0 mg.  $^1\text{H}$  NMR (500 MHz,  $\text{CDCl}_3$ )  $\delta$  8.21 (d,  $J = 2.0$  Hz, 1H), 7.67-7.64 (m, 2H), 7.49-7.39 (m, 4H), 6.75 (d,  $J = 9.0$  Hz, 1H), 3.20-3.16 (m, 4H), 2.01-1.97 (m, 4H).  $^{13}\text{C}$  NMR (125 MHz,  $\text{CDCl}_3$ )  $\delta$  175.4, 147.2, 135.8, 134.8, 133.0, 130.5, 128.6, 125.0, 120.4, 116.2, 106.4, 91.7, 88.1, 52.2, 25.9. HRMS (ESI)  $m/z$ :  $[\text{M}+\text{H}]^+$  calcd for  $\text{C}_{19}\text{H}_{17}\text{BrNO}$  354.0488, found 354.0485.

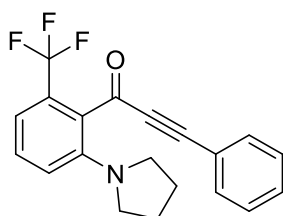

**1s**

***3-phenyl-1-(2-(pyrrolidin-1-yl)-6-(trifluoromethyl)phenyl)prop-2-yn-1-one* (1s).**

Yellow oil, purified by chromatography on silica gel (petroleum ether/ethyl acetate = 20:1); yield: 53%, 546.6 mg.  $^1\text{H}$  NMR (500 MHz,  $\text{CDCl}_3$ )  $\delta$  7.57-7.54(m, 2H), 7.45-7.42 (m, 1H), 7.39-7.34 (m, 3H), 7.08 (d,  $J = 7.5$  Hz, 1H), 7.01 (d,  $J = 8.5$  Hz, 1H), 3.38-3.34 (m, 4H), 2.00-1.93 (m, 4H).  $^{13}\text{C}$  NMR (125 MHz,  $\text{CDCl}_3$ )  $\delta$  181.4, 147.6, 133.0, 130.8, 130.0, 128.59 (d,  $J = 30.6$  Hz), 128.57, 124.6, 123.9 (q,  $J = 272.8$  Hz), 120.2, 118.7, 114.6 (q,  $J = 5.6$  Hz), 94.1, 89.7, 51.6, 25.9. HRMS (ESI)  $m/z$ :  $[\text{M}+\text{H}]^+$  calcd for  $\text{C}_{20}\text{H}_{17}\text{F}_3\text{NO}$  344.1257, found 344.1250.

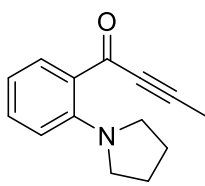

**1t**

***1-(2-(pyrrolidin-1-yl)phenyl)but-2-yn-1-one* (1t).** Yellow oil, purified by chromatography on silica gel (petroleum ether/ethyl acetate = 20:1); yield: 47%, 300.2 mg.  $^1\text{H}$  NMR (500 MHz,  $\text{CDCl}_3$ )  $\delta$  8.08-8.05 (m, 1H), 7.38-7.25 (m, 1H), 6.83-6.80 (m, 1H), 6.77-6.72 (m, 1H), 3.18-3.15 (m, 4H), 2.11 (s, 3H), 1.98-1.94 (m, 4H).  $^{13}\text{C}$  NMR (125 MHz,  $\text{CDCl}_3$ )  $\delta$  177.1, 148.2, 133.3, 133.2, 123.7, 115.0, 114.2, 89.9, 80.6, 51.9, 25.9, 4.3. HRMS (ESI)  $m/z$ :  $[\text{M}+\text{H}]^+$  calcd for  $\text{C}_{14}\text{H}_{16}\text{NO}$  214.1226, found 214.1219.

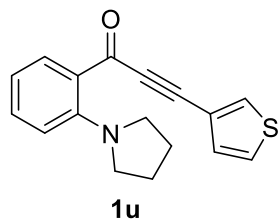

**1-(2-(pyrrolidin-1-yl)phenyl)-3-(thiophen-3-yl)prop-2-yn-1-one (1u).** Yellow oil, purified by chromatography on silica gel (petroleum ether/ethyl acetate = 20:1); yield: 68%, 573.8 mg.  $^1\text{H}$  NMR (500 MHz,  $\text{CDCl}_3$ )  $\delta$  8.17-8.11 (m, 1H), 7.80-7.74 (m, 1H), 7.42-7.32 (m, 2H), 7.31-7.27 (m, 1H), 6.85 (d,  $J = 8.5$  Hz, 1H), 6.80-6.76 (m, 1H), 3.24-3.17 (m, 4H), 2.00-1.96 (m, 4H).  $^{13}\text{C}$  NMR (125 MHz,  $\text{CDCl}_3$ )  $\delta$  176.7, 148.3, 133.3, 133.1, 132.9, 130.2, 125.9, 123.7, 120.0, 115.1, 114.3, 88.8, 86.2, 52.0, 25.9. HRMS (ESI)  $m/z$ :  $[\text{M}+\text{H}]^+$  calcd for  $\text{C}_{17}\text{H}_{16}\text{NOS}$  282.0947, found 282.0951.

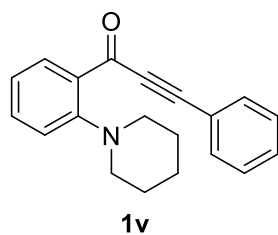

**3-phenyl-1-(2-(piperidin-1-yl)phenyl)prop-2-yn-1-one (1v).** Yellow oil, purified by chromatography on silica gel (petroleum ether/ethyl acetate = 20:1); yield: 65%, 563.9 mg.  $^1\text{H}$  NMR (500 MHz,  $\text{CDCl}_3$ )  $\delta$  8.00-7.90 (m, 1H), 7.66-7.60 (m, 2H), 7.48-7.36 (m, 4H), 7.07 (d,  $J = 8.5$  Hz, 1H), 7.00 (t,  $J = 7.5$  Hz, 1H) 3.13-3.06 (m, 4H), 1.79-1.74 (m, 4H), 1.58-1.54 (m, 2H).  $^{13}\text{C}$  NMR (125 MHz,  $\text{CDCl}_3$ )  $\delta$  178.9, 154.0, 133.7, 132.9, 132.8, 130.2, 130.1, 128.6, 120.8, 120.5, 118.6, 90.0, 89.3, 54.4, 25.9, 24.1. HRMS (ESI)  $m/z$ :  $[\text{M}+\text{H}]^+$  calcd for  $\text{C}_{20}\text{H}_{20}\text{NO}$  290.1539, found 290.1540.

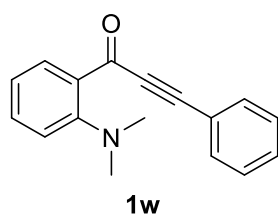

**3-phenyl-1-(2-(piperidin-1-yl)phenyl)prop-2-yn-1-one (1v).** Yellow oil, purified by chromatography on silica gel (petroleum ether/ethyl acetate = 20:1); yield: 20%, 149.4

mg.  $^1\text{H}$  NMR (500 MHz,  $\text{CDCl}_3$ )  $\delta$  8.18-8.10 (m, 1H), 7.63 (d,  $J = 7.0$  Hz, 2H), 7.47-7.37 (m, 4H), 7.00 (d,  $J = 8.5$  Hz, 1H), 6.89 (t,  $J = 7.5$  Hz, 1H) 2.95 (s, 6H).  $^{13}\text{C}$  NMR (125 MHz,  $\text{CDCl}_3$ )  $\delta$  177.5, 152.7, 133.9, 133.7, 132.9, 130.3, 128.6, 126.2, 120.8, 117.8, 116.4, 90.4, 88.7, 44.0. HRMS (ESI)  $m/z$ :  $[\text{M}+\text{H}]^+$  calcd for  $\text{C}_{17}\text{H}_{16}\text{NO}$  250.1226, found 250.1226.

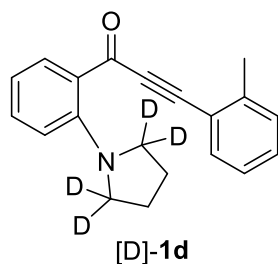

**1-(2-(pyrrolidin-1-yl-2,2,5,5- $d_4$ )phenyl)-3-(o-tolyl)prop-2-yn-1-one ([D]-1d).** Yellow oil, purified by chromatography on silica gel (petroleum ether/ethyl acetate = 20:1); yield: 55%, 403.2 mg.  $^1\text{H}$  NMR (500 MHz,  $\text{CDCl}_3$ )  $\delta$  8.24-7.16 (m, 1H), 7.64-7.57 (m, 1H), 7.42-7.36 (m, 1H), 7.35-7.30 (m, 1H), 7.26 (d,  $J = 7.0$  Hz, 1H), 7.23-7.17 (m, 1H), 6.85 (d,  $J = 9.0$  Hz, 1H), 6.78 (t,  $J = 7.5$  Hz, 1H), 2.95 (s, 0.14H), 2.57 (s, 3H), 1.97 (s, 4H).  $^{13}\text{C}$  NMR (125 MHz,  $\text{CDCl}_3$ )  $\delta$  176.9, 148.4, 141.9, 133.4, 133.3, 133.1, 130.2, 129.7, 125.8, 124.0, 120.6, 115.1, 114.3, 92.6, 89.9, 51.4, 44.1, 25.7, 20.8. HRMS (ESI)  $m/z$ :  $[\text{M}+\text{H}]^+$  calcd for  $\text{C}_{20}\text{H}_{16}\text{D}_4\text{NO}$  294.1791, found 294.1794.

### 3. Synthesis of 2

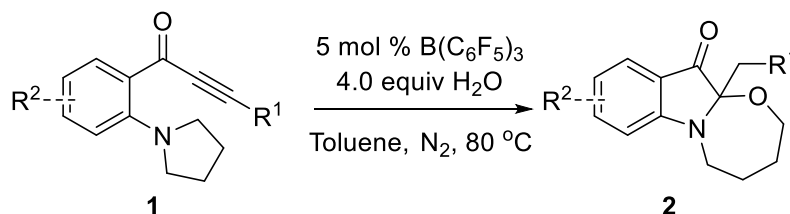

In a 10 mL dry schlenk tube, alkynones **1** (0.1 mmol, 1.0 equiv),  $\text{B}(\text{C}_6\text{F}_5)_3$  (0.005 mmol, 2.6 mg, 0.05 equiv),  $\text{H}_2\text{O}$  (0.4 mmol, 7.2 mg, 4.0 equiv) and Toluene (1.0 mL) were stirred under  $\text{N}_2$  at 80  $^\circ\text{C}$  (oil bath). After 1.5-15 h, the reaction mixture was cooled to room temperature and quenched with  $\text{NH}_4\text{Cl}$  aqueous solution (4 mL). Then the filtrate was extracted with DCM (5 mL  $\times$  3). The organic layers were combined, washed with

brine, dried over anhydrous  $\text{Na}_2\text{SO}_4$ , filtered and concentrated under reduced pressure. Purification by column chromatography with petroleum ether/ethyl acetate = 15:1-10:1 as the eluent to afford **2a-2u**.

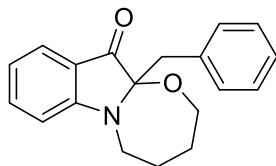

**2a**

**11a-benzyl-2,3,4,5-tetrahydro-[1,3]oxazepino[3,2-a]indol-11(11aH)-one (2a).** Yellow solid, purified by chromatography on silica gel (petroleum ether/ethyl acetate = 10:1); yield: 82%, 24.0 mg, m.p. 130-132 °C.  $^1\text{H}$  NMR (500 MHz,  $\text{CDCl}_3$ )  $\delta$  7.44-7.41 (m, 1H), 7.38-7.33 (m, 1H), 7.16-7.13 (m, 5H), 6.65-6.58 (m, 2H), 3.83-3.77 (m, 1H), 3.73-3.68 (m, 1H), 3.10-2.97 (m, 4H), 1.61-1.56 (m, 4H).  $^{13}\text{C}$  NMR (125 MHz,  $\text{CDCl}_3$ )  $\delta$  202.2, 160.4, 138.1, 134.4, 130.6, 127.8, 126.7, 124.6, 120.0, 117.5, 109.0, 94.7, 66.5, 41.4, 40.7, 30.1, 24.6. HRMS (ESI)  $m/z$ :  $[\text{M}+\text{H}]^+$  calcd for  $\text{C}_{19}\text{H}_{20}\text{NO}_2$  294.1489, found 294.1486.

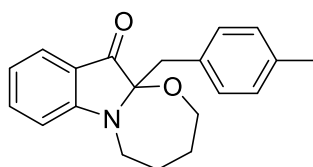

**2b**

**11a-(4-methylbenzyl)-2,3,4,5-tetrahydro-[1,3]oxazepino[3,2-a]indol-11(11aH)-one (2b).** Yellow solid, purified by chromatography on silica gel (petroleum ether/ethyl acetate = 10:1); yield: 70%, 21.5 mg, m.p. 117-119 °C.  $^1\text{H}$  NMR (500 MHz,  $\text{CDCl}_3$ )  $\delta$  7.44-7.41 (m, 1H), 7.38-7.34 (m, 1H), 7.03 (d,  $J$  = 8.0 Hz, 2H), 6.94 (d,  $J$  = 8.0 Hz, 2H), 6.65-6.57 (m, 2H), 3.81-3.76 (m, 1H), 3.73-3.67 (m, 1H), 3.07-2.93 (m, 4H), 2.22 (s, 3H), 1.62-1.56 (m, 4H).  $^{13}\text{C}$  NMR (125 MHz,  $\text{CDCl}_3$ )  $\delta$  202.3, 160.4, 138.0, 136.1, 131.2, 130.3, 128.5, 124.5, 120.0, 117.4, 109.0, 94.6, 66.4, 41.4, 40.2, 30.1, 24.5, 21.0. HRMS (ESI)  $m/z$ :  $[\text{M}+\text{H}]^+$  calcd for  $\text{C}_{20}\text{H}_{22}\text{NO}_2$  308.1645, found 308.1644.

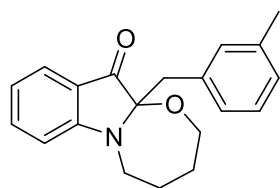

**2c**

***11a-(3-methylbenzyl)-2,3,4,5-tetrahydro-[1,3]oxazepino[3,2-a]indol-11(11aH)-one***

**(2c).** yellow solid, purified by chromatography on silica gel (petroleum ether/ethyl acetate = 10:1); yield: 71%, 21.7 mg, m.p. 113-115 °C. <sup>1</sup>H NMR (500 MHz, CDCl<sub>3</sub>) δ 7.45-7.42 (m, 1H), 7.39-7.34 (m, 1H), 7.05-7.01 (m, 1H), 6.96-6.91 (m, 3H), 6.65-6.57 (m, 2H), 3.82-3.78 (m, 1H), 3.70-3.66 (m, 1H), 3.01-2.90 (m, 4H), 2.23 (s, 3H), 1.60-1.58 (m, 4H). <sup>13</sup>C NMR (125 MHz, CDCl<sub>3</sub>) δ 202.3, 160.4, 138.0, 137.2, 134.3, 131.3, 127.60, 127.56, 127.4, 124.6, 120.0, 117.4, 109.0, 94.6, 66.4, 41.4, 40.6, 30.1, 24.6, 21.3. HRMS (ESI) m/z: [M+H]<sup>+</sup> calcd for C<sub>20</sub>H<sub>22</sub>NO<sub>2</sub> 308.1645, found 308.1647.

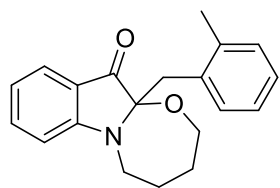

**2d**

***11a-(2-methylbenzyl)-2,3,4,5-tetrahydro-[1,3]oxazepino[3,2-a]indol-11(11aH)-one***

**(2d).** yellow oil, purified by chromatography on silica gel (petroleum ether/ethyl acetate = 15:1); yield: 56%, 17.1 mg. <sup>1</sup>H NMR (500 MHz, CDCl<sub>3</sub>) δ 7.51-7.48 (m, 1H), 7.44-7.39 (m, 1H), 7.22 (d, *J* = 7.5 Hz, 1H), 7.08-7.02 (m, 3H), 6.70-6.64 (m, 2H), 3.84-3.79 (m, 1H), 3.62-3.57 (m, 1H), 3.11 (d, *J* = 14.0 Hz, 1H), 2.98 (d, *J* = 14.0 Hz, 1H), 2.91-2.84 (m, 1H), 2.78-2.71 (m, 1H), 2.31 (s, 3H), 1.58-1.49 (m, 4H). <sup>13</sup>C NMR (125 MHz, CDCl<sub>3</sub>) δ 202.8, 160.2, 138.2, 137.6, 133.2, 131.9, 130.0, 126.8, 125.2, 124.8, 119.9, 117.7, 109.3, 94.9, 66.7, 41.8, 37.2, 30.0, 24.7, 20.0. HRMS (ESI) m/z: [M+H]<sup>+</sup> calcd for C<sub>20</sub>H<sub>22</sub>NO<sub>2</sub> 308.1645, found 308.1640.

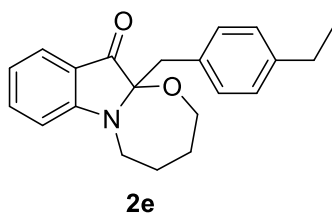

***11a-(4-ethylbenzyl)-2,3,4,5-tetrahydro-[1,3]oxazepino[3,2-a]indol-11(11aH)-one***

**(2e).** Yellow oil, purified by chromatography on silica gel (petroleum ether/ethyl acetate = 10:1); yield: 62%, 19.9 mg. <sup>1</sup>H NMR (500 MHz, CDCl<sub>3</sub>) δ 7.45-7.42 (m, 1H), 7.39-7.34 (m, 1H), 7.06 (d, *J* = 8.0 Hz, 2H), 6.98 (d, *J* = 8.0 Hz, 2H), 6.66-6.58 (m, 2H), 3.82-3.78 (m, 1H), 3.72-3.67 (m, 1H), 3.07-2.91 (m, 4H), 2.53 (q, *J* = 7.5 Hz, 2H), 1.60-1.57 (m, 4H), 1.14 (t, *J* = 7.5 Hz, 3H). <sup>13</sup>C NMR (125 MHz, CDCl<sub>3</sub>) δ 202.4, 160.4, 142.5, 138.0, 131.5, 130.5, 127.3, 124.6, 120.0, 117.4, 109.0, 94.7, 66.4, 41.4, 40.3, 30.1, 28.4, 24.6, 15.4. HRMS (ESI) *m/z*: [M+H]<sup>+</sup> calcd for C<sub>21</sub>H<sub>24</sub>NO<sub>2</sub> 322.1802, found 322.1794.

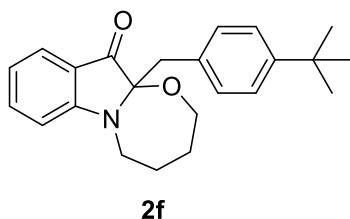

***11a-(4-(tert-butyl)benzyl)-2,3,4,5-tetrahydro-[1,3]oxazepino[3,2-a]indol-11(11aH)-one***

**(2f).** Yellow oil, purified by chromatography on silica gel (petroleum ether/ethyl acetate = 10:1); yield: 64%, 22.3 mg. <sup>1</sup>H NMR (500 MHz, CDCl<sub>3</sub>) δ 7.44-7.42 (m, 1H), 7.39-7.34 (m, 1H), 7.18-7.15 (m, 2H), 7.09-7.06 (m, 2H), 6.66-6.58 (m, 2H), 3.82-3.78 (m, 1H), 3.72-3.68 (m, 1H), 3.07-2.93 (m, 4H), 1.63-1.57 (m, 4H), 1.23 (s, 9H). <sup>13</sup>C NMR (125 MHz, CDCl<sub>3</sub>) δ 202.4, 160.4, 149.4, 138.0, 131.3, 130.2, 124.64, 124.60, 120.0, 117.4, 109.0, 94.7, 66.5, 41.4, 40.2, 34.3, 31.3, 30.1, 24.6. HRMS (ESI) *m/z*: [M+H]<sup>+</sup> calcd for C<sub>23</sub>H<sub>28</sub>NO<sub>2</sub> 350.2115, found 350.2120.

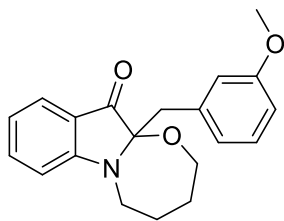

**2g**

**11a-(3-methoxybenzyl)-2,3,4,5-tetrahydro-[1,3]oxazepino[3,2-a]indol-11(11aH)-one (2g).** Yellow oil, purified by chromatography on silica gel (petroleum ether/ethyl acetate = 10:1); yield: 68%, 22.1 mg.  $^1\text{H}$  NMR (500 MHz,  $\text{CDCl}_3$ )  $\delta$  7.46-7.43 (m, 1H), 7.40-7.35 (m, 1H), 7.08-7.05 (m, 1H), 6.76-6.70 (m, 2H), 6.69-6.60 (m, 3H), 3.82-3.76 (m, 1H), 3.71 (s, 3H), 3.70-3.66 (m, 1H), 3.10-2.90 (m, 4H), 1.63-1.57 (m, 4H).  $^{13}\text{C}$  NMR (125 MHz,  $\text{CDCl}_3$ )  $\delta$  202.2, 160.4, 159.0, 138.1, 136.0, 128.7, 124.6, 123.1, 120.0, 117.5, 116.0, 112.4, 109.0, 94.5, 66.4, 55.1, 41.4, 40.8, 30.1, 24.6. HRMS (ESI)  $m/z$ :  $[\text{M}+\text{H}]^+$  calcd for  $\text{C}_{20}\text{H}_{22}\text{NO}_3$  324.1594, found 324.1593.

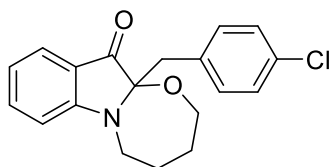

**2h**

**11a-(4-chlorobenzyl)-2,3,4,5-tetrahydro-[1,3]oxazepino[3,2-a]indol-11(11aH)-one (2h).** yellow oil, purified by chromatography on silica gel (petroleum ether/ethyl acetate = 10:1); yield: 84%, 27.6 mg.  $^1\text{H}$  NMR (600 MHz,  $\text{CDCl}_3$ )  $\delta$  7.44 (d,  $J$  = 6.0 Hz, 1H), 7.41-7.37 (m, 1H), 7.14-7.11 (m, 2H), 7.09-7.06 (m, 2H), 6.68-6.62 (m, 2H), 3.83-3.80 (m, 1H), 3.73-3.70 (m, 1H), 3.07-2.87 (m, 4H), 1.66-1.55 (m, 4H).  $^{13}\text{C}$  NMR (150 MHz,  $\text{CDCl}_3$ )  $\delta$  201.9, 160.4, 138.3, 132.9, 132.6, 131.8, 127.9, 124.6, 120.0, 117.8, 109.2, 94.4, 66.5, 41.5, 40.0, 30.1, 24.5. HRMS (ESI)  $m/z$ :  $[\text{M}+\text{H}]^+$  calcd for  $\text{C}_{19}\text{H}_{19}\text{ClNO}_2$  328.1099, found 328.1098.



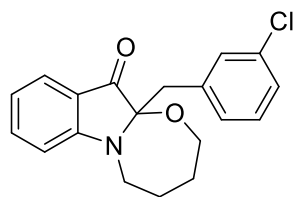

**2i**

***11a-(3-chlorobenzyl)-2,3,4,5-tetrahydro-[1,3]oxazepino[3,2-a]indol-11(11aH)-one***

**(2i).** Yellow oil, purified by chromatography on silica gel (petroleum ether/ethyl acetate = 10:1); yield: 86%, 28.0 mg.  $^1\text{H}$  NMR (600 MHz,  $\text{CDCl}_3$ )  $\delta$  7.45 (d,  $J = 7.8$  Hz, 1H), 7.41-7.37(m, 1H), 7.16-7.14 (m, 1H), 7.13-7.02 (m, 3H), 6.69-6.62 (m, 2H), 3.84-3.79 (m, 1H), 3.75-3.71 (m, 1H), 3.08-2.91 (m, 4H), 1.66-1.56 (m, 4H).  $^{13}\text{C}$  NMR (150MHz,  $\text{CDCl}_3$ )  $\delta$  201.8, 160.3, 138.3, 136.5, 133.5, 130.5, 129.0, 128.8, 126.9, 124.6, 119.9, 117.8, 109.2, 94.3, 66.5, 41.5, 40.4, 30.1, 24.6. HRMS (ESI)  $m/z$ :  $[\text{M}+\text{H}]^+$  calcd for  $\text{C}_{19}\text{H}_{19}\text{ClNO}_2$  328.1099, found 328.1094.

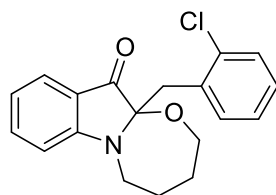

**2j**

***11a-(2-chlorobenzyl)-2,3,4,5-tetrahydro-[1,3]oxazepino[3,2-a]indol-11(11aH)-one***

**(2j).** Yellow oil, purified by chromatography on silica gel (petroleum ether/ethyl acetate = 15:1); yield: 72%, 23.6 mg.  $^1\text{H}$  NMR (500 MHz,  $\text{CDCl}_3$ )  $\delta$  7.47-7.43 (m, 1H), 7.39-7.35 (m, 1H), 7.30-7.26 (m, 1H), 7.25-7.22 (m, 1H), 7.08-7.04 (m, 2H), 6.66-6.59 (m, 2H), 3.84-3.79 (m, 1H), 3.73-3.68 (m, 1H), 3.32 (d,  $J = 13.5$  Hz, 1H), 3.21 (d,  $J = 13.5$  Hz, 1H), 3.11-3.07 (m, 1H), 2.93-2.88 (m, 1H), 1.59-1.55 (m, 4H).  $^{13}\text{C}$  NMR (125 MHz,  $\text{CDCl}_3$ )  $\delta$  202.5, 160.4, 138.2, 135.1, 133.0, 132.3, 129.2, 128.1, 126.1, 124.5, 120.0, 117.5, 109.3, 94.4, 66.6, 41.9, 37.3, 30.1, 24.7. HRMS (ESI)  $m/z$ :  $[\text{M}+\text{H}]^+$  calcd for  $\text{C}_{19}\text{H}_{18}\text{ClNO}_2\text{Na}$  350.0918, found 350.0922.

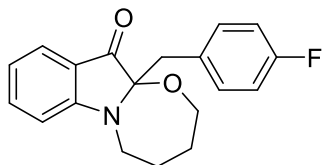

**2k**

***11a-(4-fluorobenzyl)-2,3,4,5-tetrahydro-[1,3]oxazepino[3,2-a]indol-11(11aH)-one***

**(2k).** Yellow oil, purified by chromatography on silica gel (petroleum ether/ethyl acetate = 10:1); yield: 85%, 26.5 mg. <sup>1</sup>H NMR (500 MHz, CDCl<sub>3</sub>) δ 7.44-7.41 (m, 1H), 7.40-7.35 (m, 1H), 7.13-7.07 (m, 2H), 6.86-6.80 (m, 2H), 6.66-6.60 (m, 2H), 3.83-3.77 (m, 1H), 3.75-3.70 (m, 1H), 3.09-2.96 (m, 4H), 1.62-1.53 (m, 4H). <sup>13</sup>C NMR (125 MHz, CDCl<sub>3</sub>) δ 202.1, 161.8 (d, *J* = 243.4 Hz), 160.4, 138.2, 132.0 (d, *J* = 7.8 Hz), 130.1 (d, *J* = 3.3 Hz), 124.6, 120.0, 117.7, 114.6 (d, *J* = 20.9 Hz), 109.1, 94.5, 66.5, 41.4, 39.8, 30.1, 24.6. HRMS (ESI) *m/z*: [M+H]<sup>+</sup> calcd for C<sub>19</sub>H<sub>19</sub>FNO<sub>2</sub> 312.1394, found 312.1391.

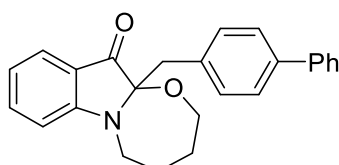

**2l**

***11a-([1,1'-biphenyl]-4-ylmethyl)-2,3,4,5-tetrahydro-[1,3]oxazepino[3,2-a]indol-***

***11(11aH)-one (2l).*** Yellow oil, purified by chromatography on silica gel (petroleum ether/ethyl acetate = 10:1); yield: 65%, 24.0 mg. <sup>1</sup>H NMR (500 MHz, CDCl<sub>3</sub>) δ 7.54-7.51 (m, 2H), 7.46-7.43 (m, 1H), 7.42-7.34 (m, 5H), 7.32-7.27 (m, 1H), 7.24-7.21 (m, 2H), 6.66 (d, *J* = 8.5 Hz, 1H), 6.63-6.59 (m, 1H), 3.84-3.80 (m, 1H), 3.76-3.71 (m, 1H), 3.15-3.01 (m, 3H), 2.97-2.90 (m, 1H), 1.62-1.57 (m, 4H). <sup>13</sup>C NMR (125 MHz, CDCl<sub>3</sub>) δ 202.2, 160.4, 140.7, 139.3, 138.1, 133.6, 131.0, 128.7, 127.1, 126.9, 126.4, 124.6, 120.0, 117.6, 109.1, 94.6, 66.5, 41.5, 40.4, 30.1, 24.6. HRMS (ESI) *m/z*: [M+H]<sup>+</sup> calcd for C<sub>25</sub>H<sub>24</sub>NO<sub>2</sub> 370.1802, found 370.1805.

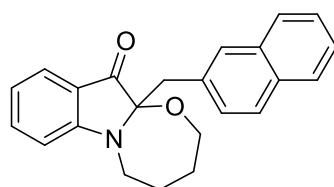

**2m**

***11a-(naphthalen-2-ylmethyl)-2,3,4,5-tetrahydro-[1,3]oxazepino[3,2-a]indol-***

***11(11aH)-one (2m)***. Yellow oil, purified by chromatography on silica gel (petroleum ether/ethyl acetate = 15:1); yield: 57%, 20.8 mg. <sup>1</sup>H NMR (500 MHz, CDCl<sub>3</sub>) δ 7.75-7.71 (m, 2H), 7.66-7.57 (m, 2H), 7.45-7.36 (m, 3H), 7.35-7.30 (m, 2H), 6.63 (d, *J* = 8.0 Hz, 1H), 6.60-6.55 (m, 1H), 3.86-3.78 (m, 1H), 3.72-3.65 (m, 1H), 3.25 (d, *J* = 13.5 Hz, 1H), 3.14 (d, *J* = 13.5 Hz, 1H), 3.05-2.92 (m, 2H), 1.61-1.50 (m, 4H). <sup>13</sup>C NMR (125 MHz, CDCl<sub>3</sub>) δ 202.2, 160.4, 138.1, 133.1, 132.3, 132.2, 129.3, 128.9, 127.7, 127.4, 127.2, 125.7, 125.4, 124.6, 120.0, 117.6, 109.2, 94.6, 66.5, 41.6, 40.9, 30.1, 24.5. HRMS (ESI) *m/z*: [M+Na]<sup>+</sup> calcd for C<sub>23</sub>H<sub>21</sub>NO<sub>2</sub>Na 366.1465 found 366.1460.

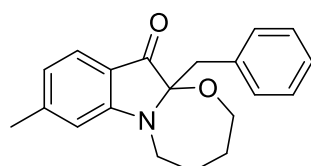

**2n**

***11a-benzyl-8-methyl-2,3,4,5-tetrahydro-[1,3]oxazepino[3,2-a]indol-11(11aH)-one***

***(2n)***. Yellow oil, purified by chromatography on silica gel (petroleum ether/ethyl acetate = 15:1); yield: 64%, 19.6 mg. <sup>1</sup>H NMR (500 MHz, CDCl<sub>3</sub>) δ 7.32 (d, *J* = 8.0 Hz, 1H), 7.17-7.10 (m, 5H), 6.43 (d, *J* = 8.0 Hz, 2H), 3.82-3.77 (m, 1H), 3.72-3.65 (m, 1H), 3.10-2.88 (m, 4H), 2.30 (s, 3H), 1.63-1.53 (m, 4H). <sup>13</sup>C NMR (125 MHz, CDCl<sub>3</sub>) δ 201.2, 160.8, 149.9, 134.6, 130.6, 127.7, 126.6, 124.4, 119.3, 117.8, 109.2, 95.0, 66.3, 41.3, 40.7, 30.1, 24.6, 22.7. HRMS (ESI) *m/z*: [M+H]<sup>+</sup> calcd for C<sub>20</sub>H<sub>22</sub>NO<sub>2</sub> 308.1645, found 308.1639.

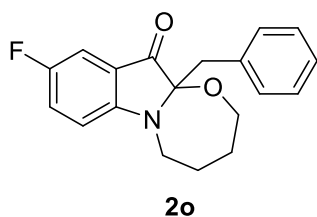

***11a-benzyl-9-fluoro-2,3,4,5-tetrahydro-[1,3]oxazepino[3,2-a]indol-11(11aH)-one***

**(2o).** Yellow oil, purified by chromatography on silica gel (petroleum ether/ethyl acetate = 10:1); yield: 70%, 21.7 mg. <sup>1</sup>H NMR (500 MHz, CDCl<sub>3</sub>) δ 7.17-7.06 (m, 7H), 6.60-6.56 (m, 1H), 3.84-3.79 (m, 1H), 3.71-3.66 (m, 1H), 3.10-2.97 (m, 3H), 2.94-2.88 (m, 1H), 1.61-1.57 (m, 4H). <sup>13</sup>C NMR (125 MHz, CDCl<sub>3</sub>) δ 202.1 (d, *J* = 3.1 Hz), 157.1, 155.4 (d, *J* = 237.4 Hz), 134.1, 130.5, 127.8, 126.8, 125.8 (d, *J* = 25.1 Hz), 120.1 (d, *J* = 6.9 Hz), 109.9 (d, *J* = 7.0 Hz), 109.6 (d, *J* = 22.5 Hz), 95.4, 66.6, 41.5, 40.8, 30.0, 24.5. HRMS (ESI) *m/z*: [M+Na]<sup>+</sup> calcd for C<sub>19</sub>H<sub>18</sub>FNO<sub>2</sub>Na 334.1214, found 334.1208.

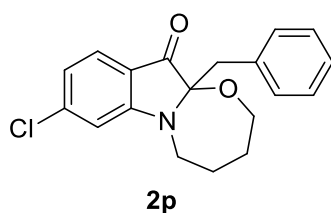

***11a-benzyl-8-chloro-2,3,4,5-tetrahydro-[1,3]oxazepino[3,2-a]indol-11(11aH)-one***

**(2p).** Yellow oil, purified by chromatography on silica gel (petroleum ether/ethyl acetate = 10:1); yield: 83%, 27.2 mg. <sup>1</sup>H NMR (500 MHz, CDCl<sub>3</sub>) δ 7.33 (d, *J* = 8.0 Hz, 1H), 7.16-7.09 (m, 5H), 6.63 (d, *J* = 1.5 Hz, 1H), 6.58-6.55 (m, 1H), 3.85-3.79 (m, 1H), 3.68-3.63 (m, 1H), 3.10-2.98 (m, 3H), 2.94-2.88 (m, 1H), 1.63-1.59 (m, 4H). <sup>13</sup>C NMR (125 MHz, CDCl<sub>3</sub>) δ 200.8, 160.5, 144.7, 133.9, 130.5, 127.9, 126.8, 125.5, 118.5, 118.3, 108.9, 95.1, 66.5, 41.5, 40.7, 30.0, 24.6. HRMS (ESI) *m/z*: [M+H]<sup>+</sup> calcd for C<sub>19</sub>H<sub>19</sub>ClNO<sub>2</sub> 328.1099, found 328.1091.

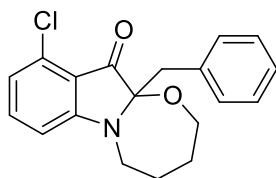

**2q**

***11a-benzyl-10-chloro-2,3,4,5-tetrahydro-[1,3]oxazepino[3,2-a]indol-11(11aH)-one***

**(2q).** Yellow solid, purified by chromatography on silica gel (petroleum ether/ethyl acetate = 10:1); yield: 81%, 26.5 mg, m.p. 156-158 °C. <sup>1</sup>H NMR (500 MHz, CDCl<sub>3</sub>) δ 7.22 (t, *J* = 8.0 Hz, 1H), 7.18-7.10 (m, 5H), 6.53-6.50 (m, 2H), 3.86-3.80 (m, 1H), 3.71-3.65 (m, 1H), 3.10-2.89 (m, 4H), 1.63-1.54 (m, 4H). <sup>13</sup>C NMR (125 MHz, CDCl<sub>3</sub>) δ 199.4, 161.2, 138.0, 134.1, 132.3, 130.5, 127.8, 126.8, 118.5, 116.6, 107.1, 94.7, 66.5, 41.5, 40.9, 30.0, 24.6. HRMS (ESI) *m/z*: [M+H]<sup>+</sup> calcd for C<sub>19</sub>H<sub>19</sub>ClNO<sub>2</sub> 328.1099, found 328.1095.

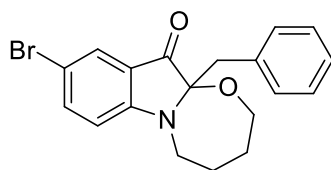

**2r**

***11a-benzyl-9-bromo-2,3,4,5-tetrahydro-[1,3]oxazepino[3,2-a]indol-11(11aH)-one***

**(2r).** Yellow oil, purified by chromatography on silica gel (petroleum ether/ethyl acetate = 10:1); yield: 67%, 24.8 mg. <sup>1</sup>H NMR (500 MHz, CDCl<sub>3</sub>) δ 7.51 (d, *J* = 2.0 Hz, 1H), 7.43-7.40 (m, 1H), 7.18-7.08 (m, 5H), 6.55 (d, *J* = 8.5 Hz, 1H), 3.84-3.78 (m, 1H), 3.72-3.66 (m, 1H), 3.10-2.97 (m, 3H), 2.92-2.85 (m, 1H), 1.62-1.56 (m, 4H). <sup>13</sup>C NMR (125 MHz, CDCl<sub>3</sub>) δ 201.0, 158.9, 140.4, 133.9, 130.5, 127.9, 126.9, 126.8, 121.5, 110.6, 109.7, 95.0, 66.6, 41.5, 40.7, 30.0, 24.5. HRMS (ESI) *m/z*: [M+H]<sup>+</sup> calcd for C<sub>19</sub>H<sub>19</sub>BrNO<sub>2</sub> 372.0594, found 372.0590.

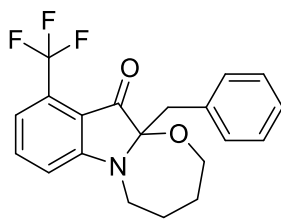

**2s**

**11a-benzyl-10-(trifluoromethyl)-2,3,4,5-tetrahydro-[1,3]oxazepino[3,2-a]indol-11(11aH)-one (2s).** Yellow solid, purified by chromatography on silica gel (petroleum ether/ethyl acetate = 10:1); yield: 68%, 24.8 mg, m.p. 113-115 °C. <sup>1</sup>H NMR (500 MHz, CDCl<sub>3</sub>) δ 7.37 (t, *J* = 8.0 Hz, 1H), 7.15-7.08 (m, 5H), 6.82 (t, *J* = 7.5 Hz, 2H), 3.87-3.82 (m, 1H), 3.78-3.72 (m, 1H), 3.19-3.12 (m, 1H), 3.06 (s, 2H), 2.96-2.90 (m, 1H), 1.65-1.59 (m, 4H). <sup>13</sup>C NMR (125 MHz, CDCl<sub>3</sub>) δ 198.7, 161.0, 137.0, 133.7, 130.4, 127.8, 127.1 (d, *J* = 34.6 Hz), 126.8, 122.3 (q, *J* = 272.1 Hz), 115.5, 114.7 (q, *J* = 5.8 Hz), 94.7, 66.6, 41.4, 41.0, 30.0, 24.8. HRMS (ESI) *m/z*: [M+H]<sup>+</sup> calcd for C<sub>23</sub>H<sub>21</sub>NO<sub>2</sub>Na 366.1465, found 366.1460.

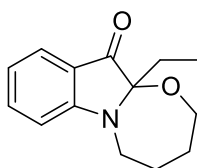

**2t**

**11a-ethyl-2,3,4,5-tetrahydro-[1,3]oxazepino[3,2-a]indol-11(11aH)-one (2t).** Yellow oil, purified by chromatography on silica gel (petroleum ether/ethyl acetate = 15:1); yield: 41%, 9.5 mg. <sup>1</sup>H NMR (500 MHz, CDCl<sub>3</sub>) δ 7.56-7.52 (m, 1H), 7.49-7.44 (m, 1H), 6.76 (d, *J* = 8.0 Hz, 1H), 6.72-6.68 (m, 1H), 3.87-3.79 (m, 1H), 3.77-3.70 (m, 1H), 3.33-3.25 (m, 1H), 2.97-2.90 (m, 1H), 1.98-1.89 (m, 1H), 1.79-1.72 (m, 1H), 1.71-1.58 (m, 4H), 0.73 (t, *J* = 7.5 Hz, 3H). <sup>13</sup>C NMR (125 MHz, CDCl<sub>3</sub>) δ 202.7, 160.8, 138.2, 124.6, 120.4, 117.4, 109.0, 95.1, 66.1, 40.7, 30.2, 27.7, 24.4, 7.2. HRMS (ESI) *m/z*: [M+H]<sup>+</sup> calcd for C<sub>14</sub>H<sub>18</sub>NO<sub>2</sub> 232.1332, found 232.1329.

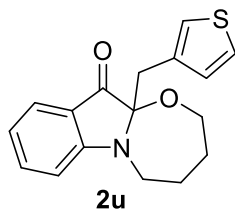

**11a-(thiophen-3-ylmethyl)-2,3,4,5-tetrahydro-[1,3]oxazepino[3,2-a]indol-11(11aH)-one (2u).** Yellow oil, purified by chromatography on silica gel (petroleum ether/ethyl acetate = 15:1); yield: 68%, 20.3 mg.  $^1\text{H}$  NMR (500 MHz,  $\text{CDCl}_3$ )  $\delta$  7.45 (d,  $J = 8.0$  Hz, 1H), 7.39 (t,  $J = 7.5$  Hz, 1H), 7.111-7.07 (m, 1H), 6.96 (d,  $J = 3.0$  Hz, 1H), 6.90 (d,  $J = 5.0$  Hz, 1H), 6.68-6.61 (m, 2H), 3.83-3.77 (m, 1H), 3.74-3.68 (m, 1H), 3.13-3.00 (m, 3H), 2.97-2.89 (m, 1H), 1.65-1.57 (m, 4H).  $^{13}\text{C}$  NMR (125 MHz,  $\text{CDCl}_3$ )  $\delta$  202.1, 160.4, 138.1, 134.5, 129.7, 124.60, 124.55, 123.7, 120.0, 117.6, 109.0, 94.1, 66.5, 41.2, 35.2, 30.2, 24.6. HRMS (ESI)  $m/z$ :  $[\text{M}+\text{Na}]^+$  calcd for  $\text{C}_{17}\text{H}_{17}\text{NO}_2\text{SNa}$  322.0872, found 322.0872.

#### 4. 1.0 mmol scale reaction for the preparation of 2a.

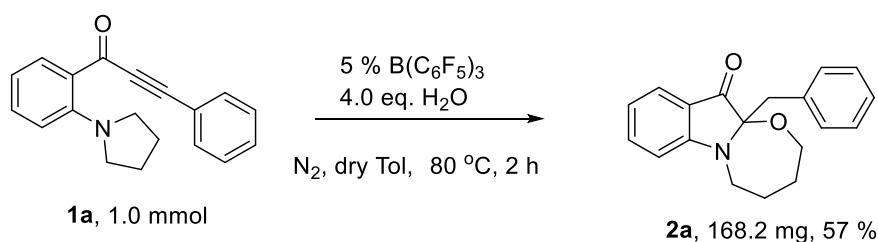

In a 25 mL dry high-pressure sealed reaction tube, alkynone **1a** (1.0 mmol, 275.1 mg, 1.0 equiv),  $\text{B}(\text{C}_6\text{F}_5)_3$  (0.05 mmol, 2.6 mg, 0.05 equiv),  $\text{H}_2\text{O}$  (4.0 mmol, 72.0 mg, 4.0 equiv) and toluene (10 mL) were stirred under  $\text{N}_2$  at  $80\text{ }^\circ\text{C}$  (oil bath). After 2 h, the reaction mixture was cooled to room temperature and quenched with  $\text{NH}_4\text{Cl}$  aqueous solution (30 mL). Then the filtrate was extracted with DCM (40 mL  $\times$  3). The organic layers were combined, washed with brine, dried over anhydrous  $\text{Na}_2\text{SO}_4$ , filtered and concentrated under reduced pressure. Purification by column chromatography with petroleum ether/ethyl acetate = 10:1 as the eluent to afford **2a** (168.2 mg, 57%).

## 5. Mechanistic study by isotopically label

### 5.1 $^{18}\text{O}$ isotopic labeling experiment

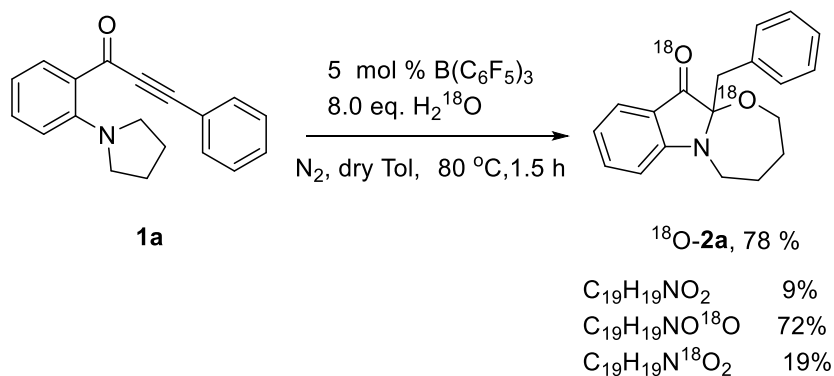

In a 25 mL dry high-pressure sealed reaction tube, alkyne **1a** (0.1 mmol, 27.5 mg, 1.0 equiv),  $\text{B}(\text{C}_6\text{F}_5)_3$  (0.005 mmol, 2.6 mg, 0.05 equiv),  $\text{H}_2^{18}\text{O}$  (0.8 mmol, 16.0 mg, 8.0 equiv) and toluene (1.0 mL) were stirred under  $\text{N}_2$  at 80 °C (oil bath). After 1.5 h, the reaction mixture was cooled to room temperature and quenched with  $\text{NH}_4\text{Cl}$  aqueous solution (4 mL). Then the filtrate was extracted with DCM (5 mL  $\times$  3). The organic layers were combined, washed with brine, dried over anhydrous  $\text{Na}_2\text{SO}_4$ , filtered and concentrated under reduced pressure. Purification by column chromatography with petroleum ether/ethyl acetate = 10:1 as the eluent to afford  $^{18}\text{O-2a}$  (23.1 mg, 78%).

$^{18}\text{O-2a}$ :  $^{13}\text{C}$  NMR (125 MHz,  $\text{CDCl}_3$ )  $\delta$  202.24, 202.20, 160.3, 138.1, 134.4, 130.5, 127.7, 126.6, 124.6, 120.0, 117.5, 109.0, 94.6, 66.5, 66.4, 41.4, 40.7, 30.1, 24.6. HRMS (ESI)  $m/z$ :  $[\text{M}+\text{H}]^+$  calcd for  $\text{C}_{19}\text{H}_{20}\text{NO}_2$  294.1489, found 294.1493;  $[\text{M}+\text{H}]^+$  calcd for  $\text{C}_{19}\text{H}_{20}\text{NO}^{18}\text{O}$  296.1531, found 296.1537;  $[\text{M}+\text{H}]^+$  calcd for  $\text{C}_{19}\text{H}_{20}\text{N}^{18}\text{O}_2$  298.1574, found 298.1580.

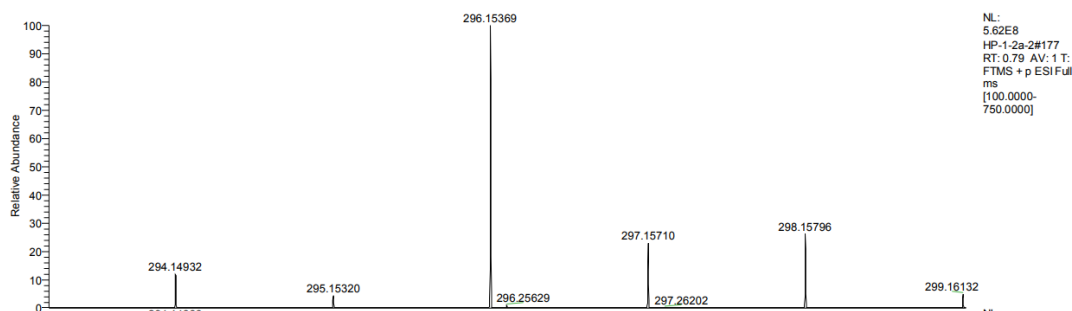



HP-1-2a-2#177 RT: 0.79  
T: FTMS + p ESI Full ms [100.0000-750.0000]  
m/z= 293.79219-298.64861

| m/z       | Intensity   | Relative |
|-----------|-------------|----------|
| 294.14932 | 70021472.0  | 12.42    |
| 295.15320 | 25504008.0  | 4.52     |
| 296.15369 | 563844608.0 | 100.00   |
| 296.25629 | 4599975.0   | 0.82     |
| 297.15710 | 132497728.0 | 23.50    |
| 297.26202 | 1147435.0   | 0.20     |
| 298.15796 | 147349248.0 | 26.13    |

$^{13}\text{C}$  NMR (125 MHz,  $\text{CDCl}_3$ )

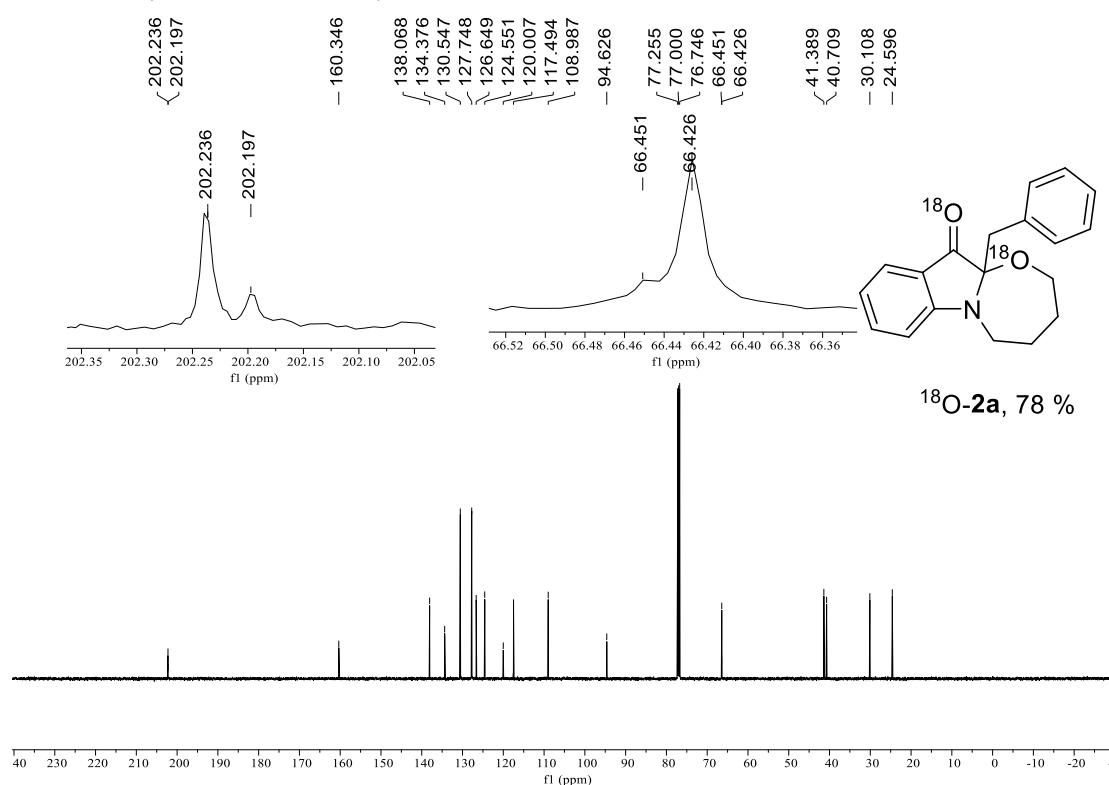

## 5.2 Deuterium Labelling Experiment

In a 25 mL dry high-pressure sealed reaction tube, alkynone [D]-**1d** (0.1 mmol, 29.3 mg, 1.0 equiv),  $\text{B}(\text{C}_6\text{F}_5)_3$  (0.005 mmol, 2.6 mg, 0.05 equiv),  $\text{H}_2\text{O}$  (0.4 mmol, 7.2 mg, 4.0 equiv) and toluene (1.0 mL) were stirred under  $\text{N}_2$  at 80 °C (oil bath). After 2 h, the reaction mixture was cooled to room temperature and quenched with  $\text{NH}_4\text{Cl}$  aqueous solution (4 mL). Then the filtrate was extracted with DCM (5 mL  $\times$  3). The organic layers were combined, washed with brine, dried over anhydrous  $\text{Na}_2\text{SO}_4$ , filtered and concentrated under reduced pressure. Purification by column chromatography with petroleum ether/ethyl acetate = 10:1 as the eluent to afford [D]-**2d** (17.1 mg, 55%).

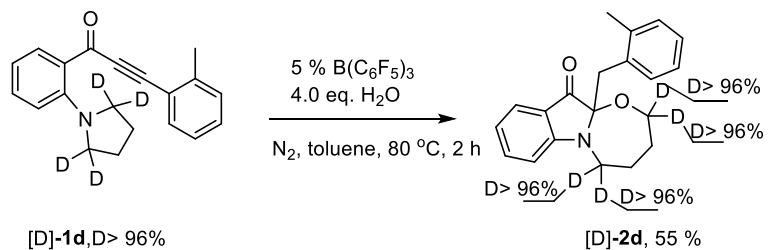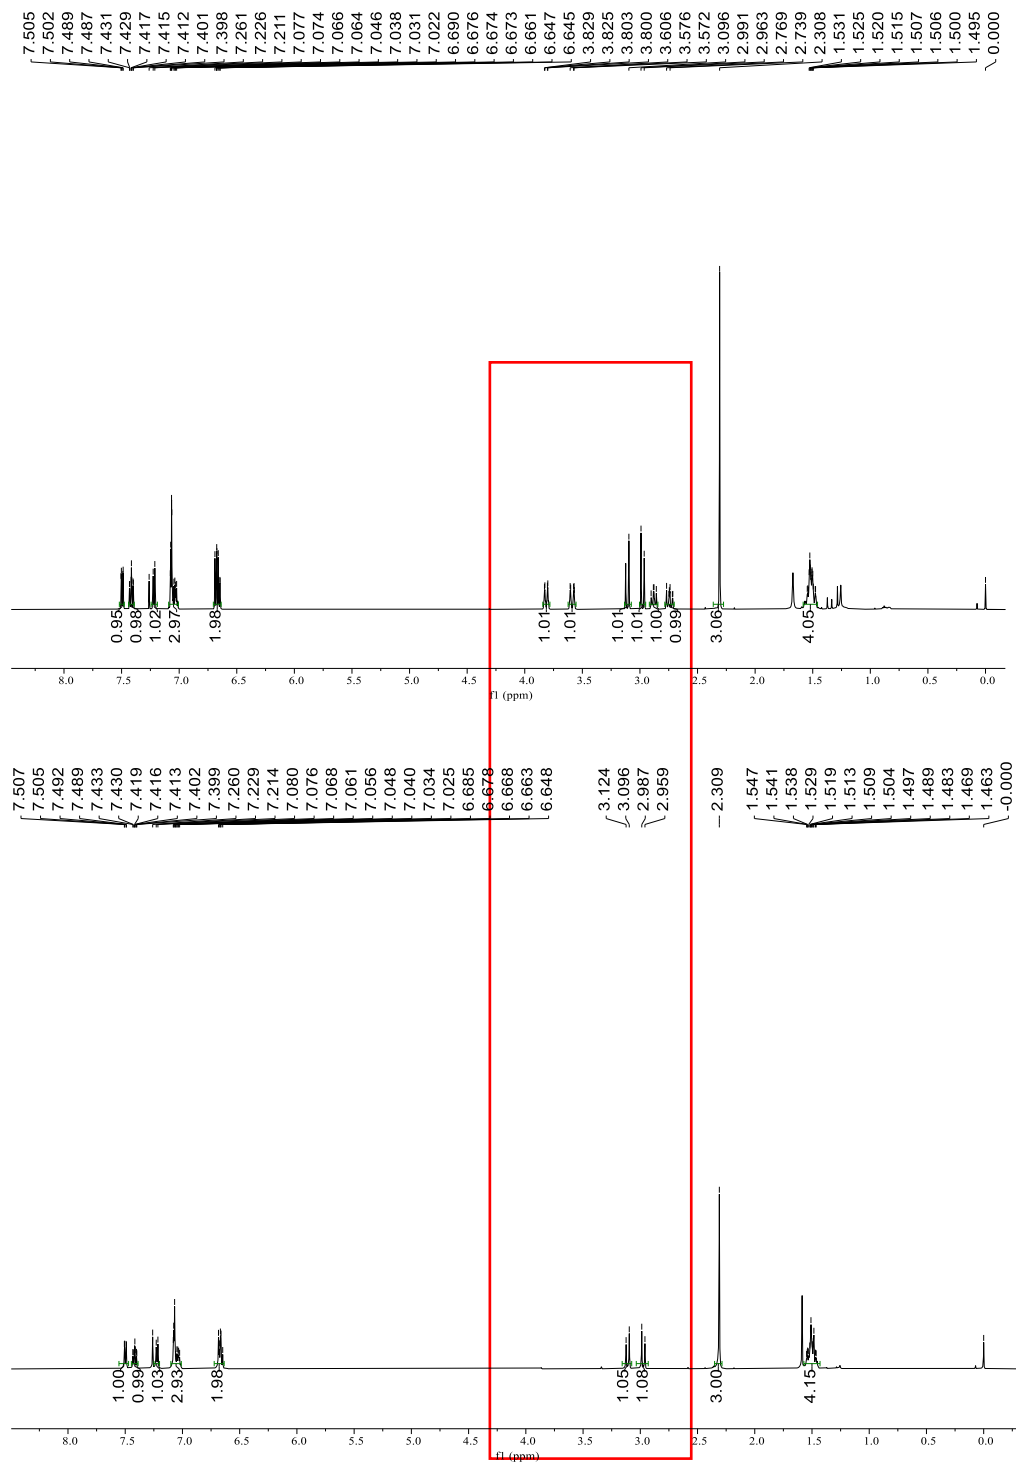

## 6. Figure S1. Possible pathway to $^{18}\text{O}$ -2a

First, **1a** undergoes 1,5-hydride transfer to furnish intermediate **C**.  $\text{H}_2^{18}\text{O}$  serves as a nucleophile attacking imine ions to form intermediate **D-2**. Under the action of Lewis acid  $\text{B}(\text{C}_6\text{F}_5)_3$ , **D-2** transforms into **M**,  $\text{H}_2^{18}\text{O}$  serves as a nucleophile again attacking **M** to form intermediate **N**. The target product  $^{18}\text{O}$ -2a could be obtained from **N** through path a or path b (see Scheme 3 in the manuscript).

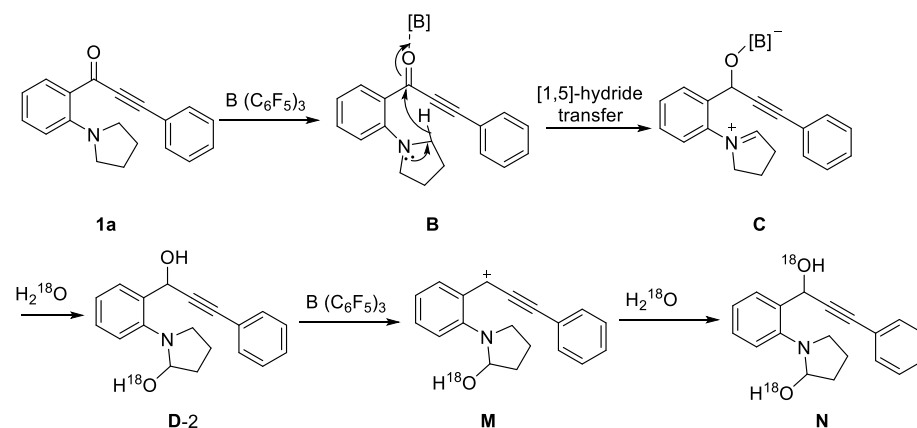

Figure S1. Possible pathway to  $^{18}\text{O}$ -2a

## 7. References

- (1) (a) Han, Y.-Y.; Han, W.-Y.; Hou, X.; Zhang, X.-M.; Yuan, W.-C.,  $\text{FeCl}_3$ -Catalyzed Stereoselective Construction of Spirooxindole Tetrahydroquinolines via Tandem 1,5-Hydride Transfer/Ring Closure. *Org. Lett.* **2012**, 14, 4054-4057; (b) Wang, S.; Shen, Y.-B.; Li, L.-F.; Qiu, B.; Yu, L.; Liu, Q.; Xiao, J., N-Alkylation-Initiated Redox-Neutral [5 + 2] Annulation of 3-Alkyloindoles with o-Aminobenzaldehydes: Access to Indole-1,2-Fused 1,4-Benzodiazepines. *Org. Lett.* **2019**, 21, 8904-8908

## 8. Copies of spectra of products

$^1\text{H}$  NMR (500 MHz,  $\text{CDCl}_3$ )

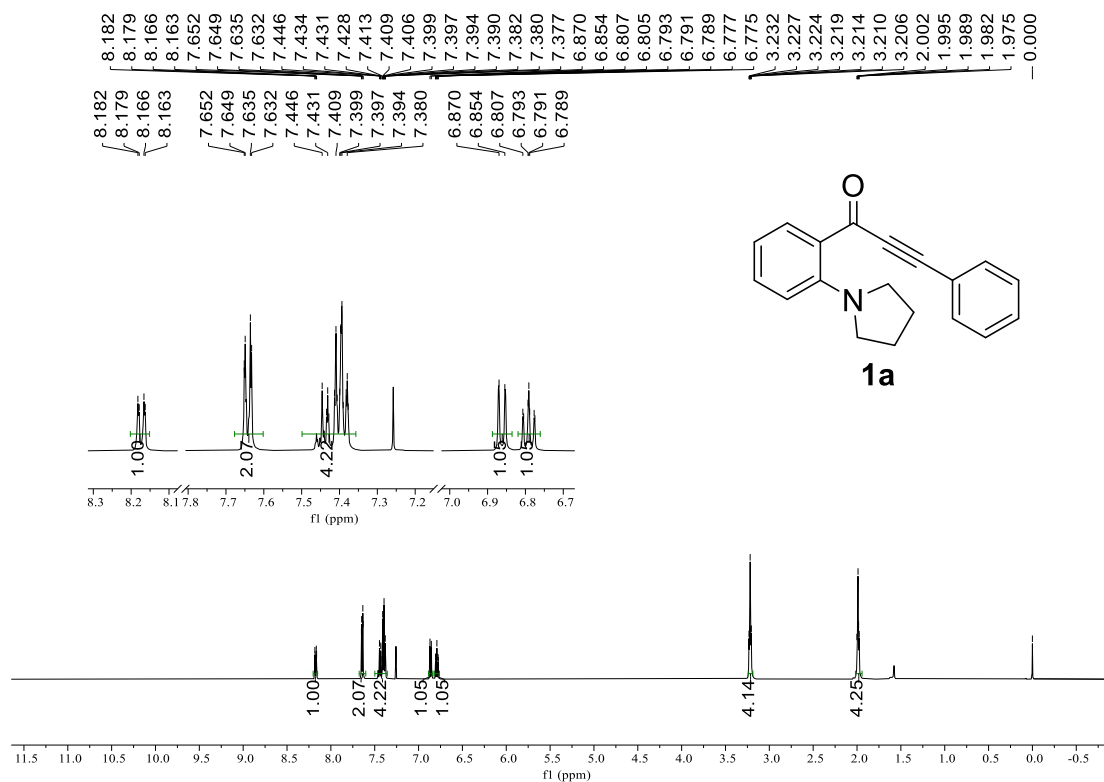

$^{13}\text{C}$  NMR (125 MHz,  $\text{CDCl}_3$ )

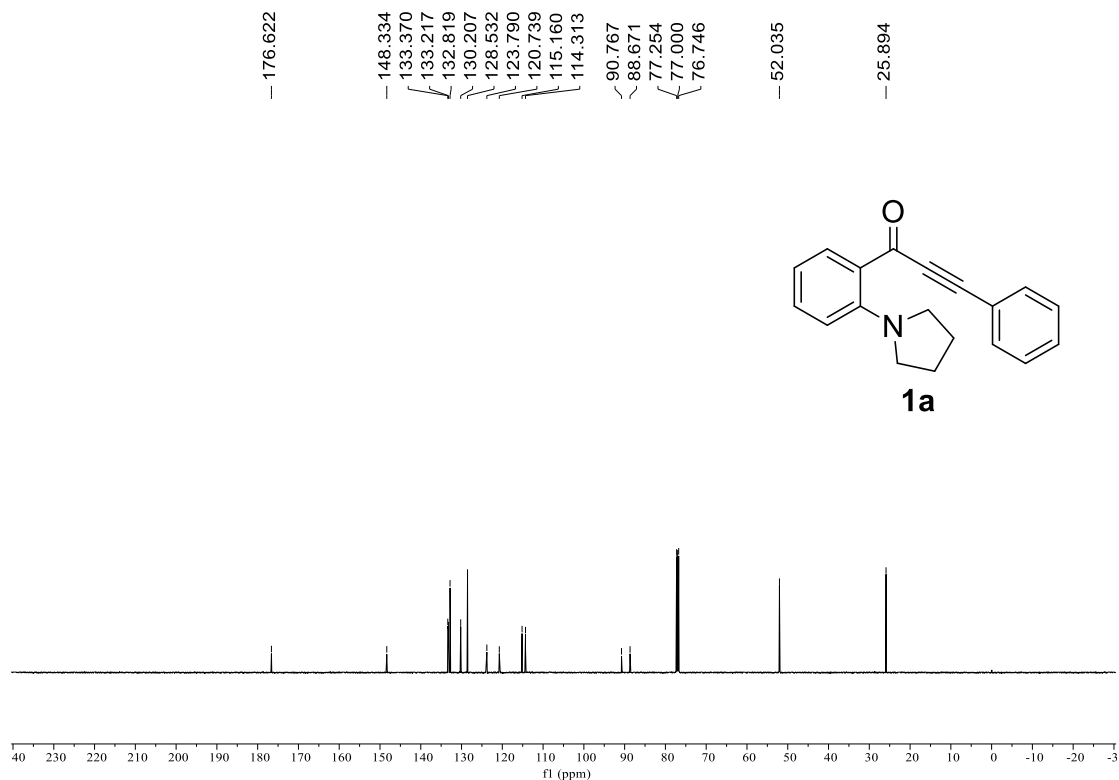

$^1\text{H}$  NMR (500 MHz,  $\text{CDCl}_3$ )

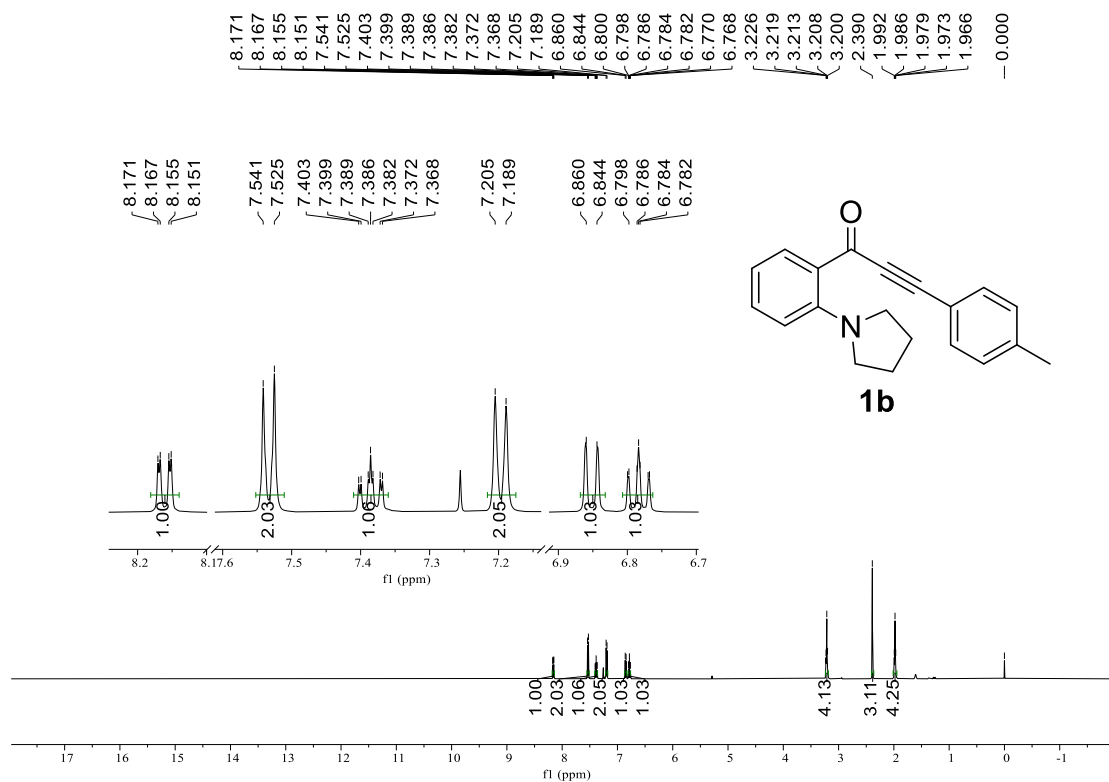

$^{13}\text{C}$  NMR (125 MHz,  $\text{CDCl}_3$ )

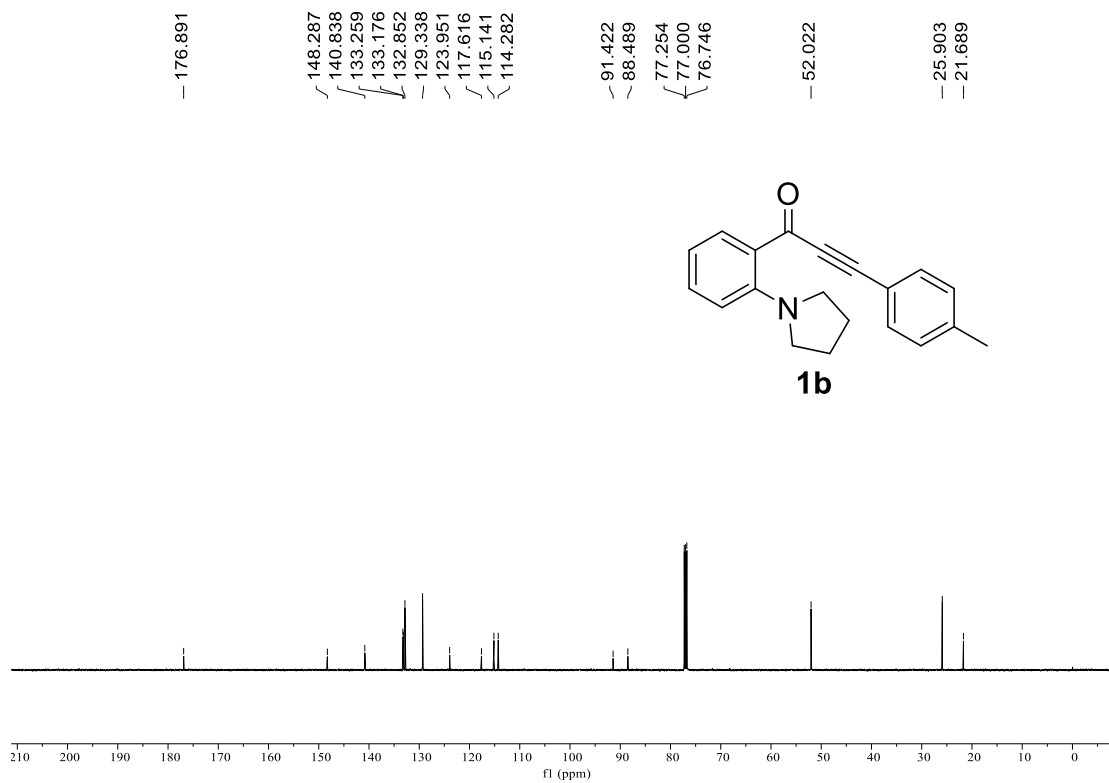

<sup>1</sup>H NMR (500 MHz, CDCl<sub>3</sub>)

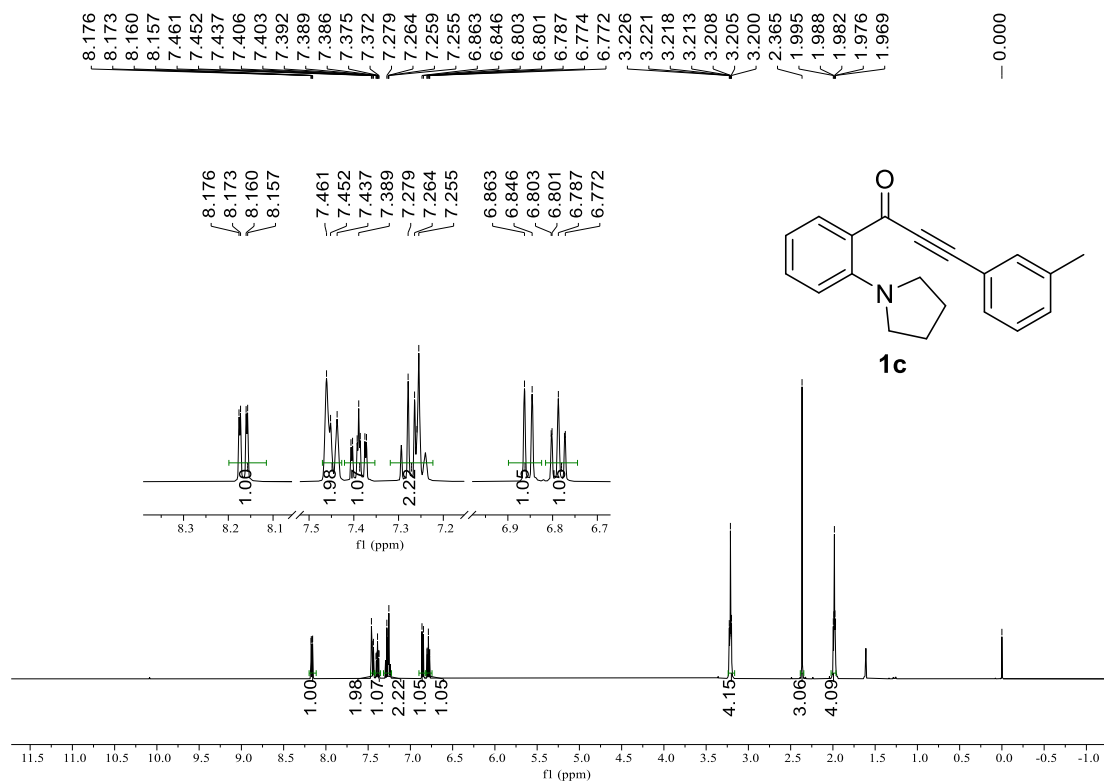

<sup>13</sup>C NMR (125 MHz, CDCl<sub>3</sub>)

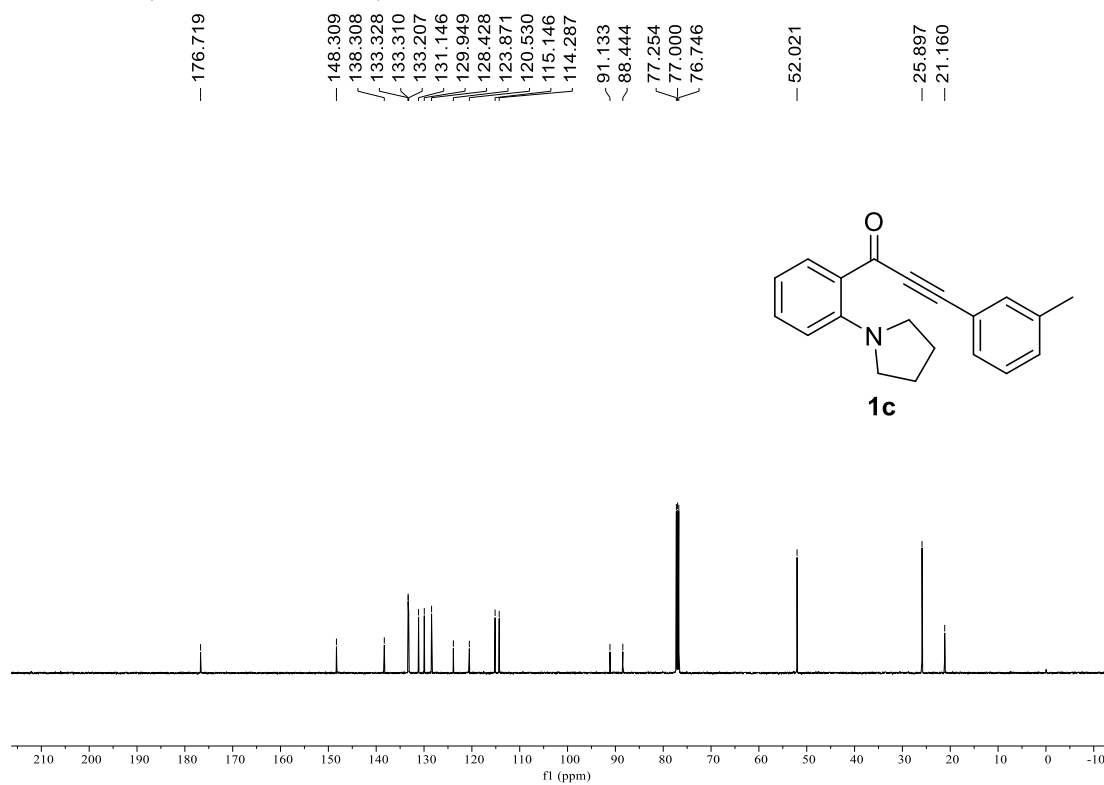

<sup>1</sup>H NMR (500 MHz, CDCl<sub>3</sub>)

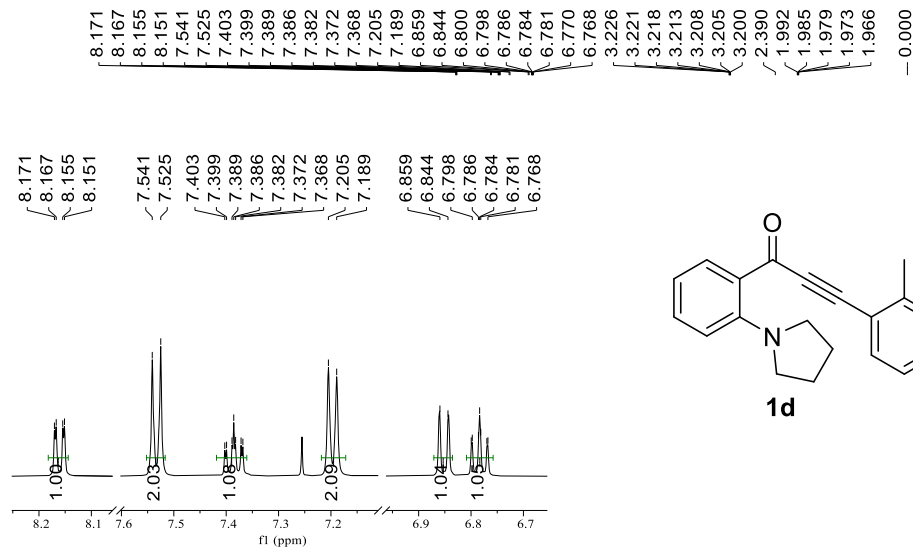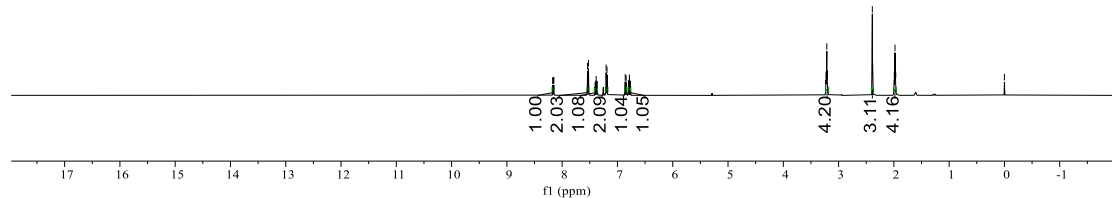

<sup>13</sup>C NMR (150 MHz, CDCl<sub>3</sub>)

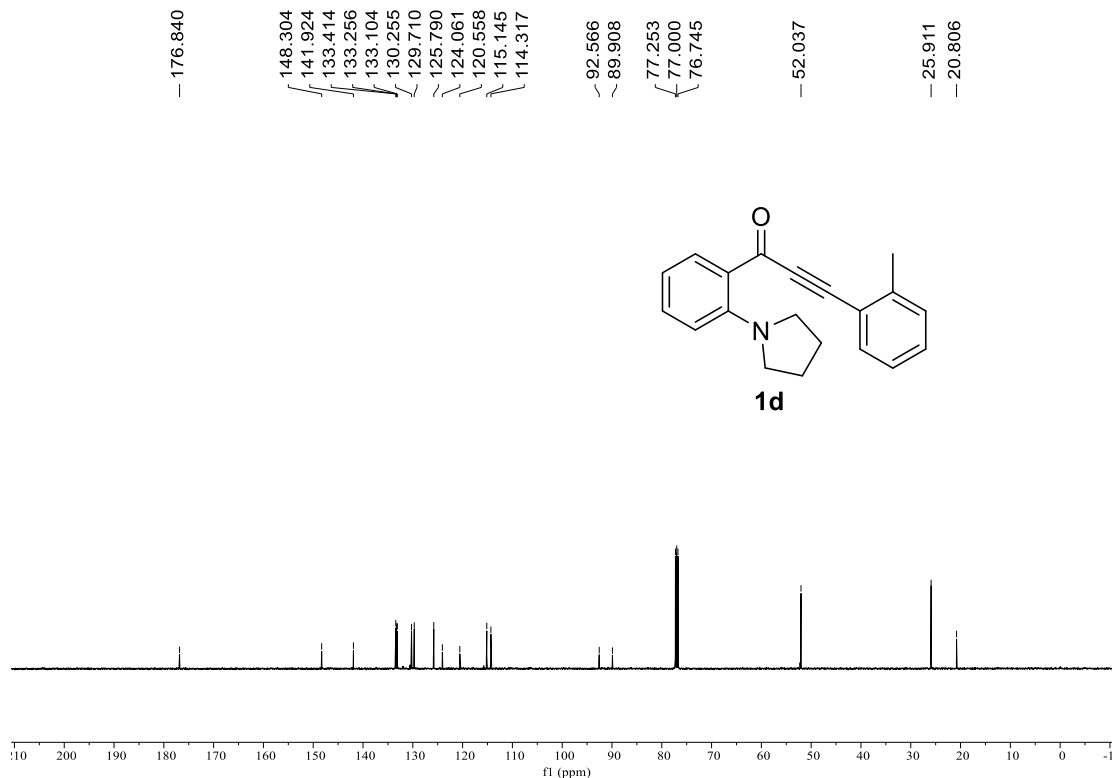

$^1\text{H}$  NMR (500 MHz,  $\text{CDCl}_3$ )

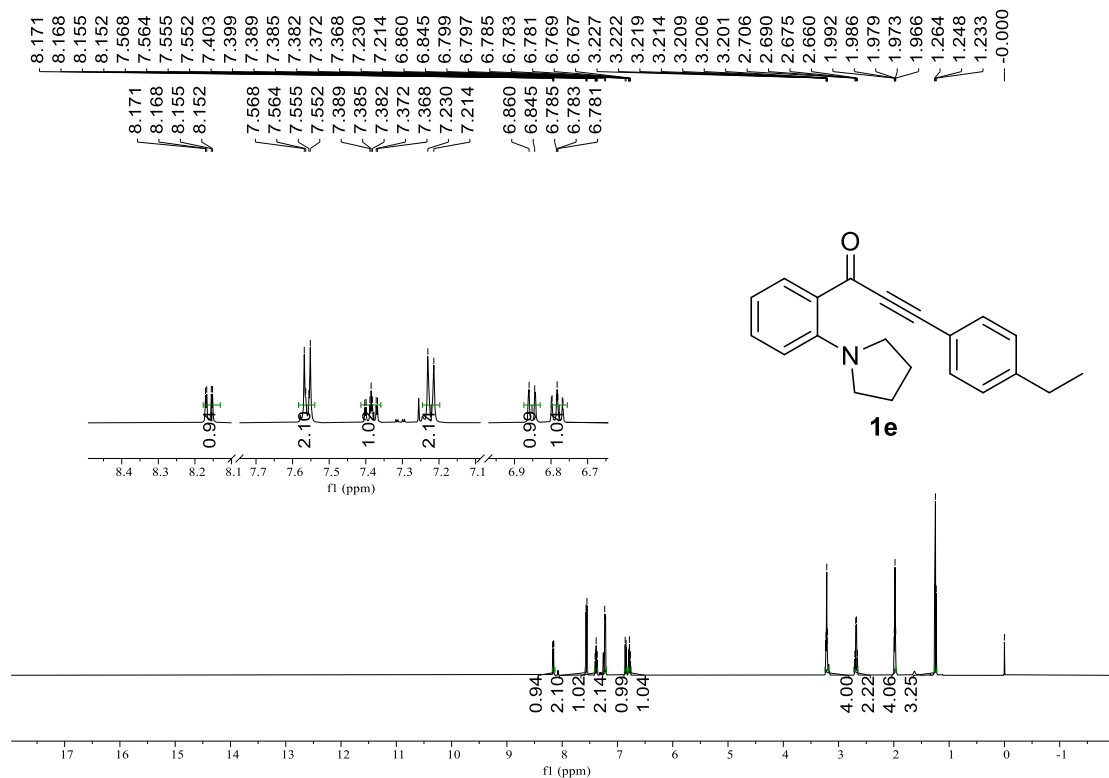

$^{13}\text{C}$  NMR (125 MHz,  $\text{CDCl}_3$ )

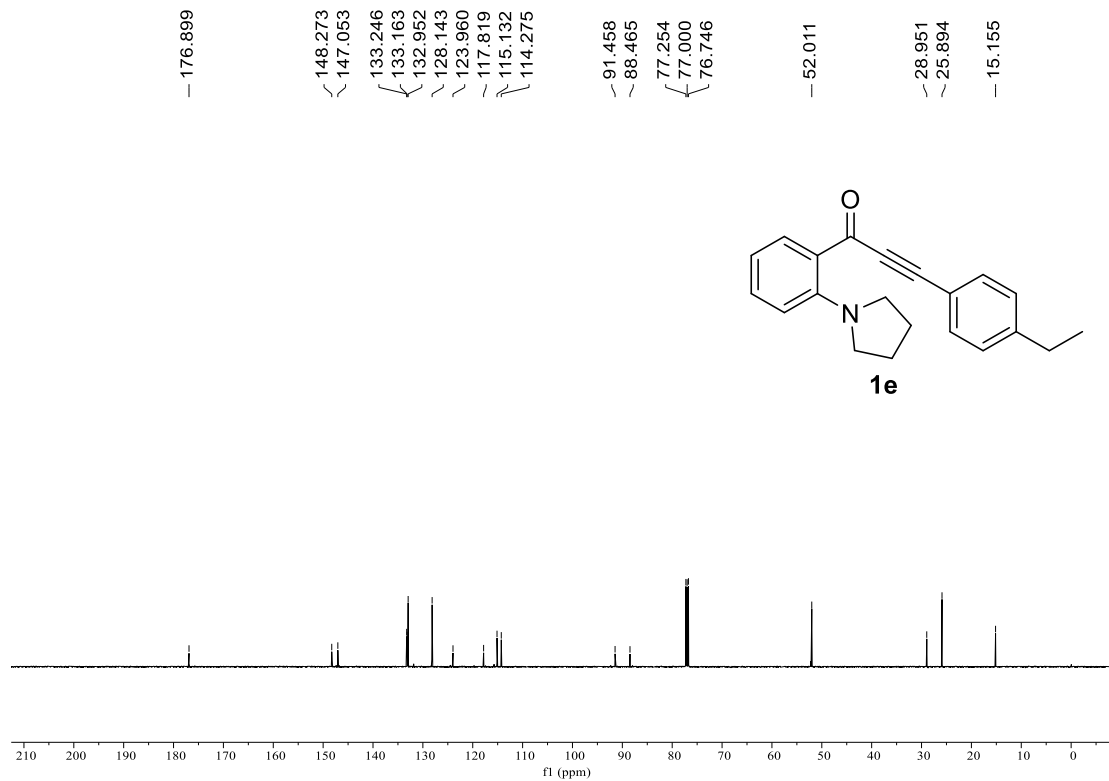



<sup>1</sup>H NMR (500 MHz, CDCl<sub>3</sub>)

8.170, 8.166, 8.154, 8.151, 7.587, 7.583, 7.574, 7.570, 7.427, 7.423, 7.419, 7.410, 7.406, 7.402, 7.391, 7.388, 7.385, 7.374, 7.371, 6.863, 6.848, 6.800, 6.798, 6.786, 6.784, 6.782, 6.770, 6.768, 3.231, 3.226, 3.223, 3.218, 3.213, 3.210, 3.205, 1.997, 1.991, 1.989, 1.984, 1.978, 1.971, 1.332, 0.000

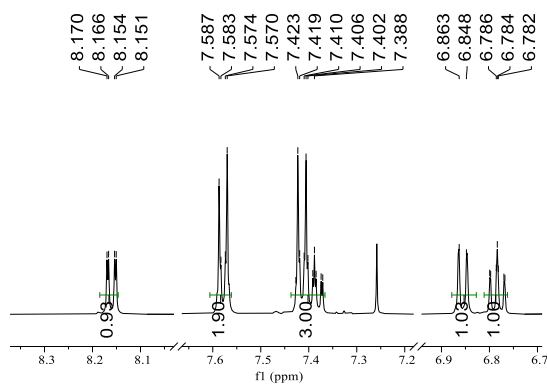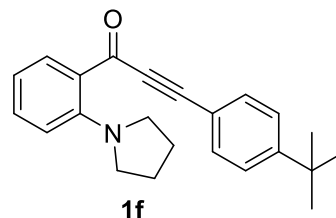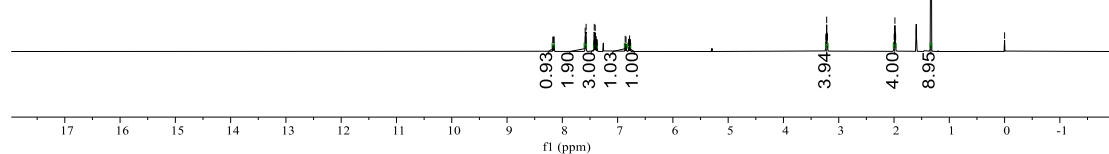

<sup>13</sup>C NMR (125 MHz, CDCl<sub>3</sub>)

176.952, 153.900, 148.292, 133.257, 133.183, 132.728, 125.608, 123.999, 117.634, 115.145, 114.287, 91.440, 88.463, 77.254, 77.000, 76.746, 52.030, 35.010, 31.058, 25.912

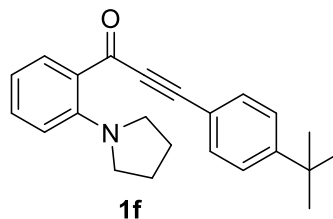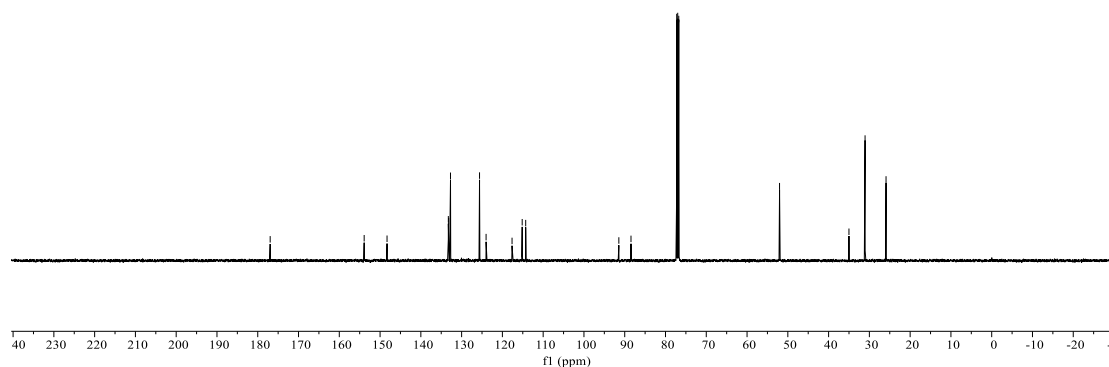

<sup>1</sup>H NMR (500 MHz, CDCl<sub>3</sub>)

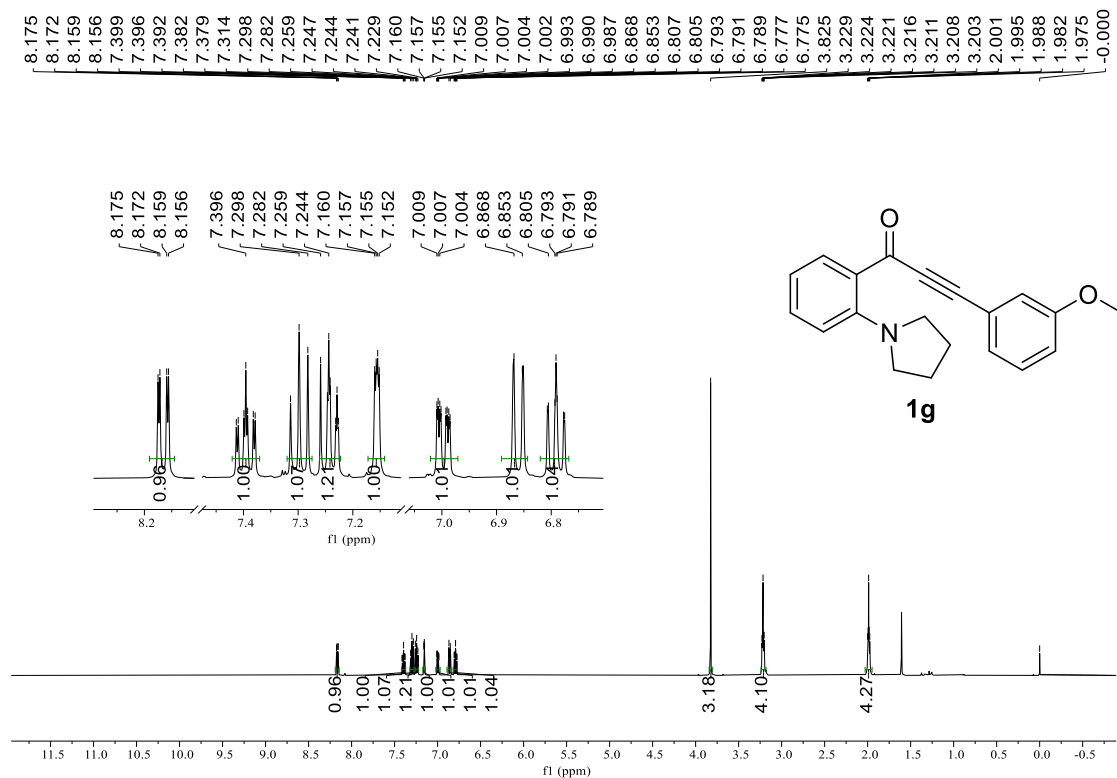

<sup>13</sup>C NMR (125 MHz, CDCl<sub>3</sub>)

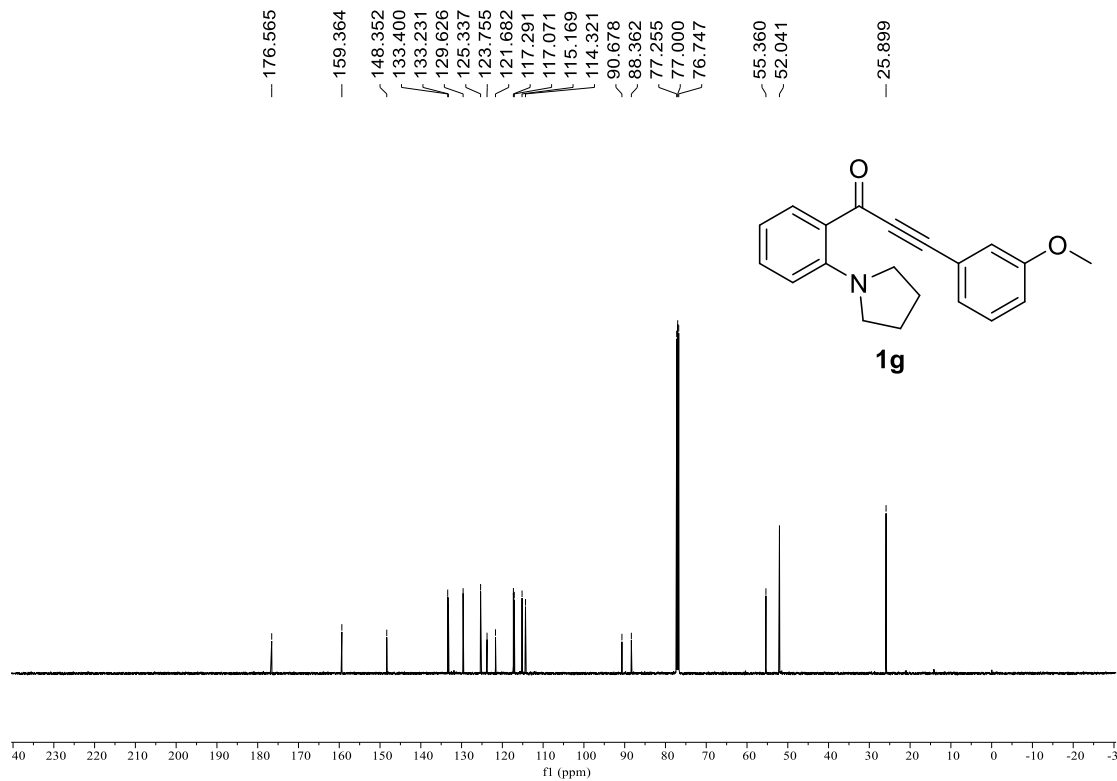

$^1\text{H}$  NMR (500 MHz,  $\text{CDCl}_3$ )

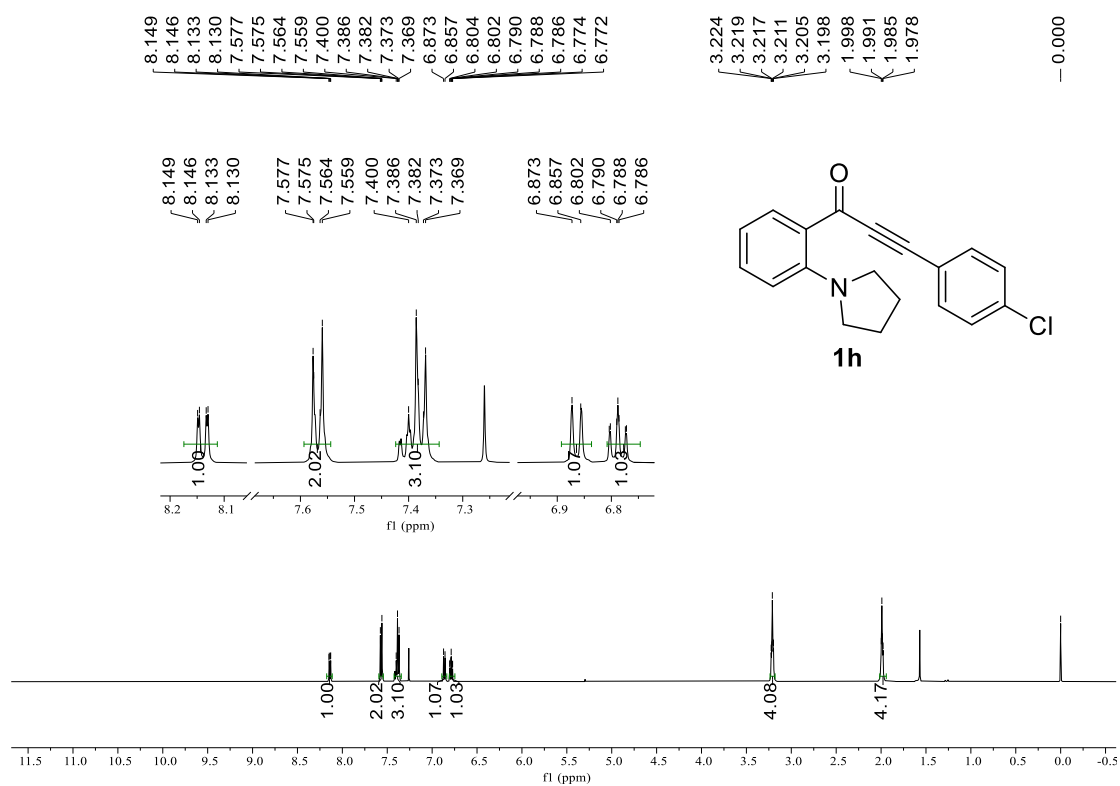

$^{13}\text{C}$  NMR (125 MHz,  $\text{CDCl}_3$ )

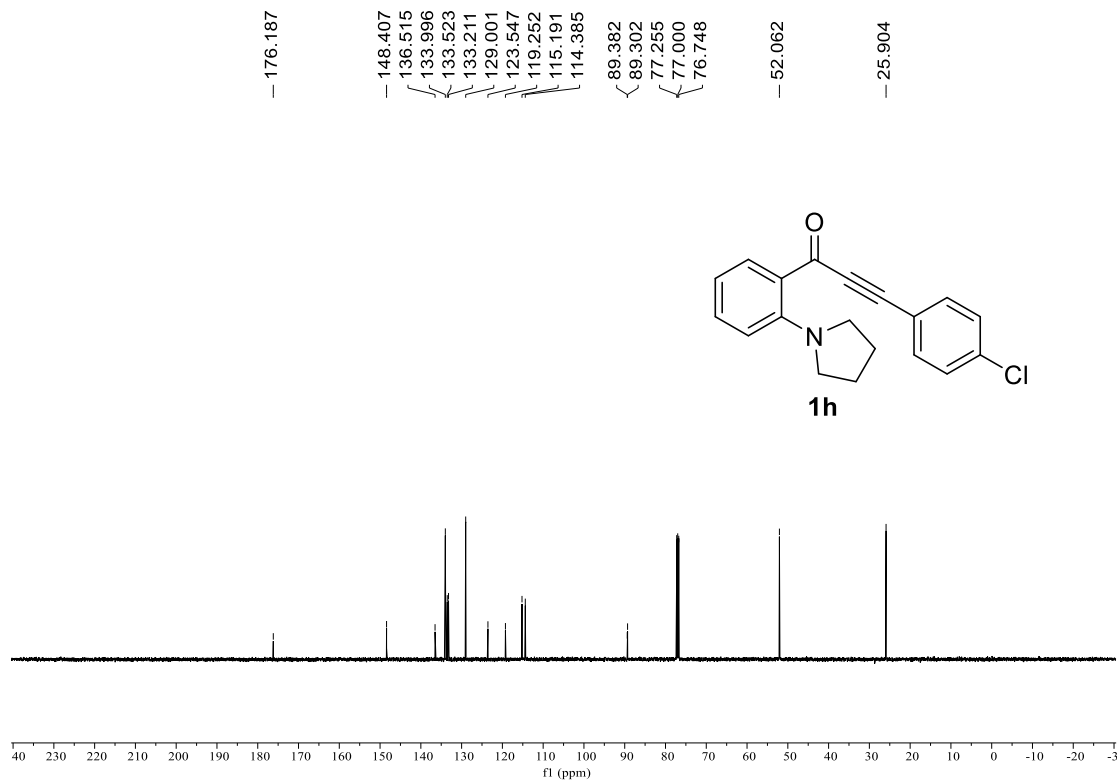

<sup>1</sup>H NMR (500 MHz, CDCl<sub>3</sub>)

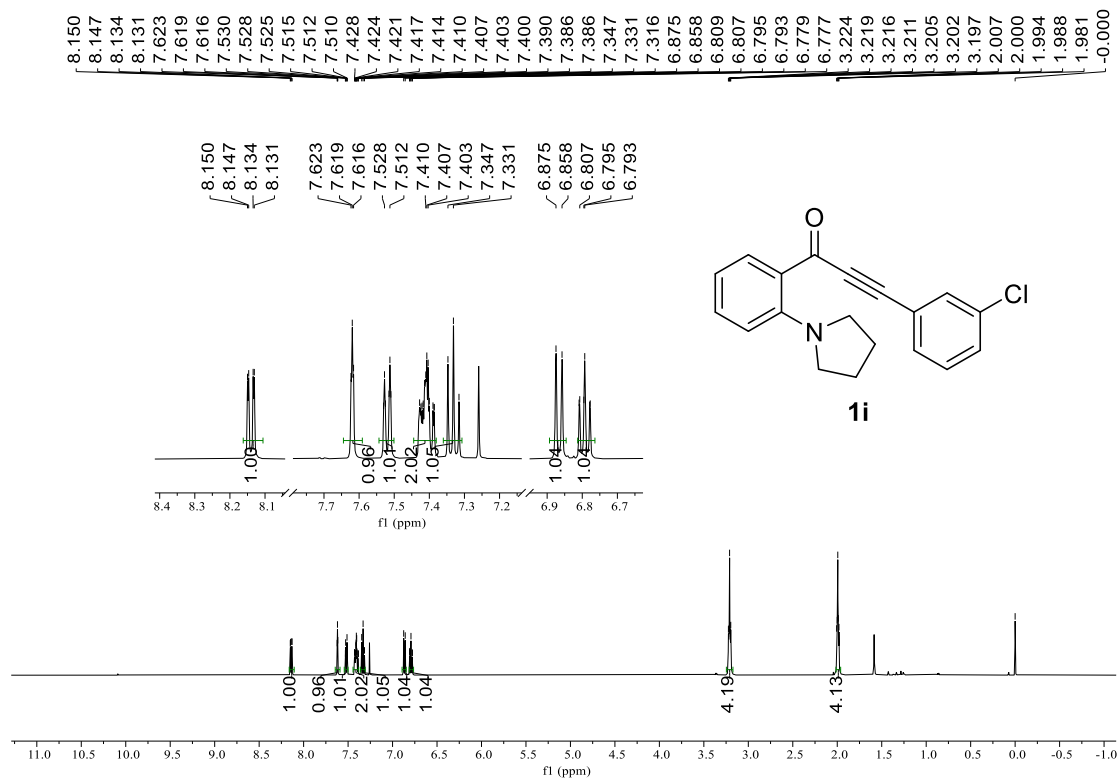

<sup>13</sup>C NMR (125 MHz, CDCl<sub>3</sub>)

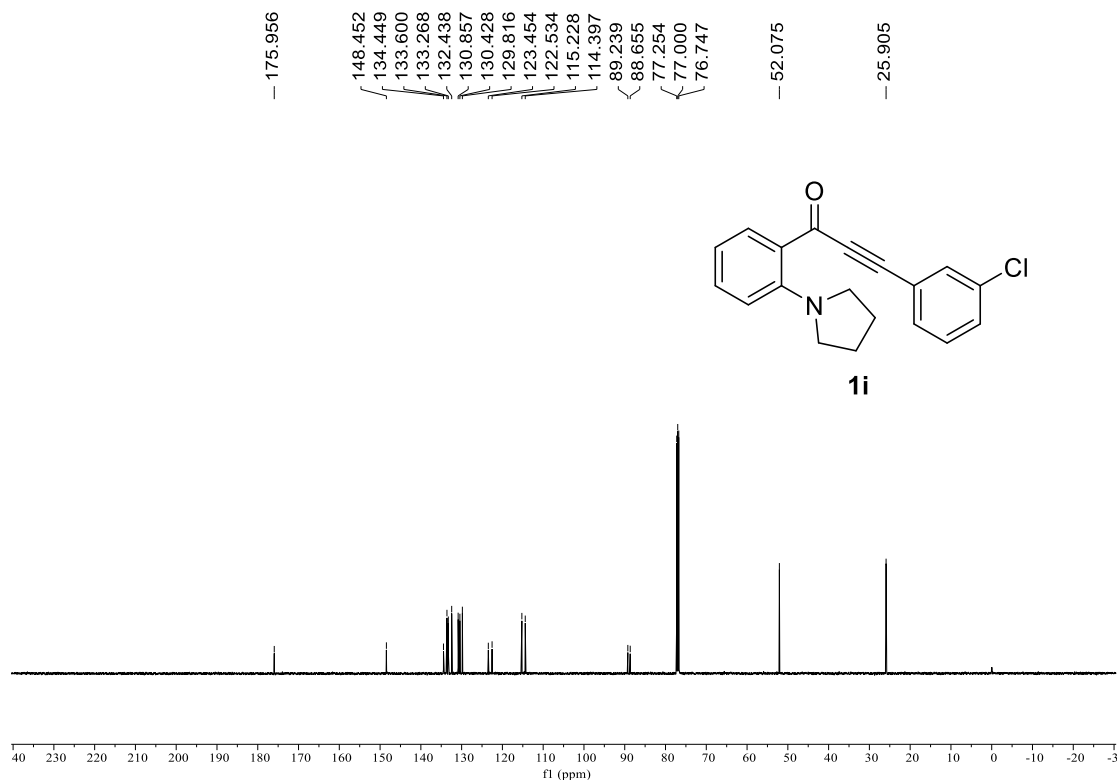

<sup>1</sup>H NMR (500 MHz, CDCl<sub>3</sub>)

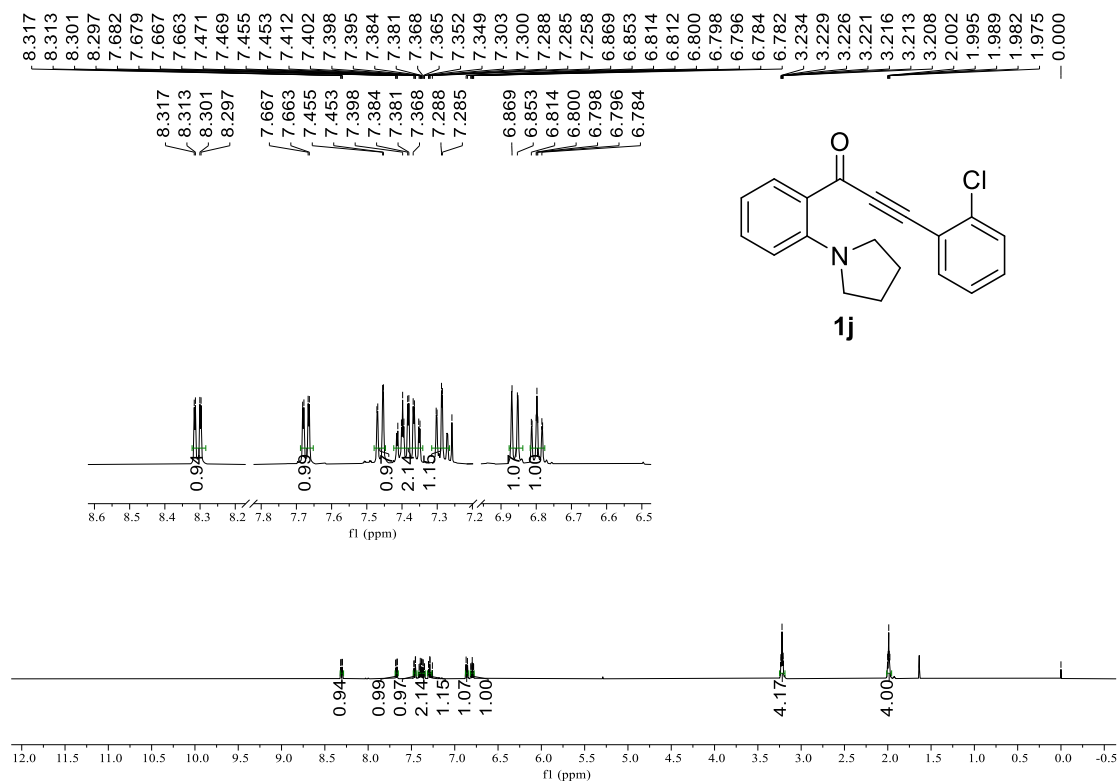

<sup>13</sup>C NMR (125 MHz, CDCl<sub>3</sub>)

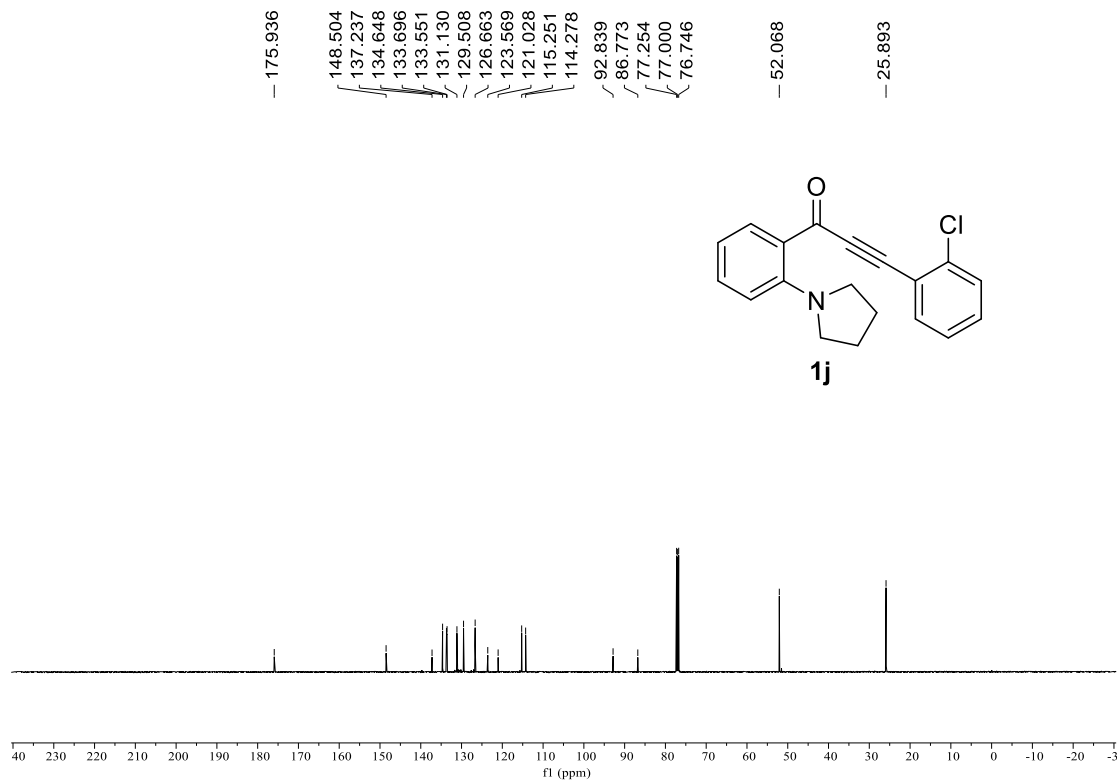

<sup>1</sup>H NMR (500 MHz, CDCl<sub>3</sub>)

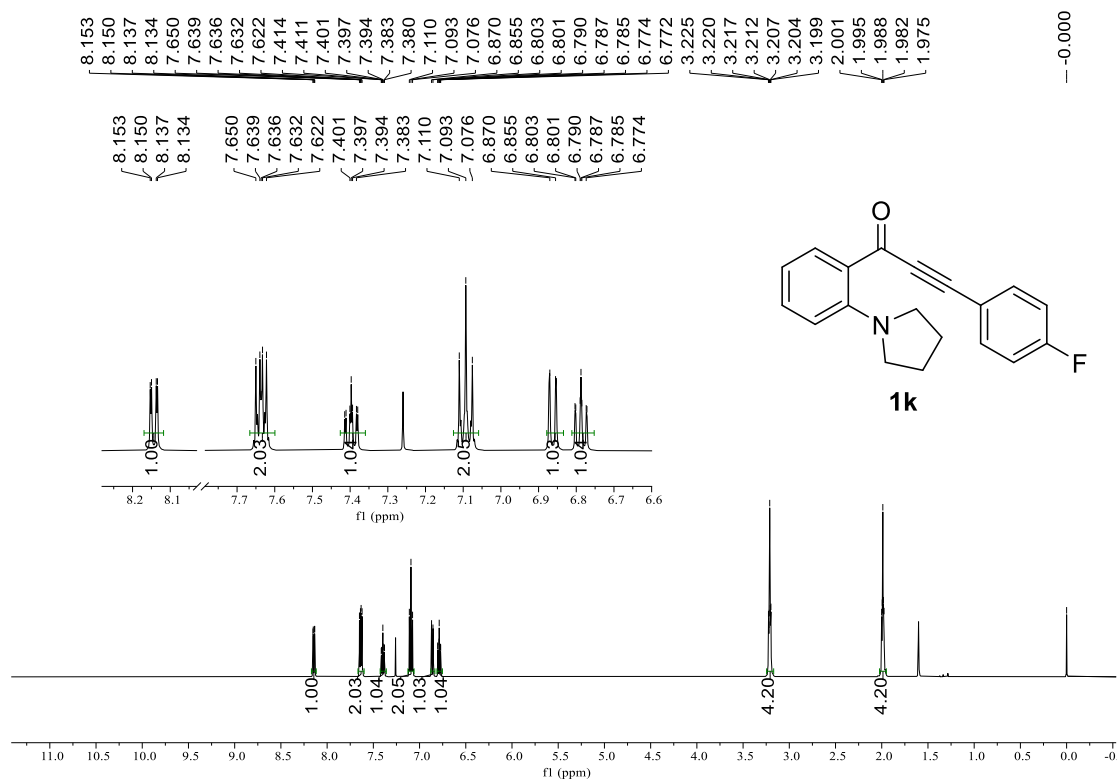

<sup>13</sup>C NMR (125 MHz, CDCl<sub>3</sub>)

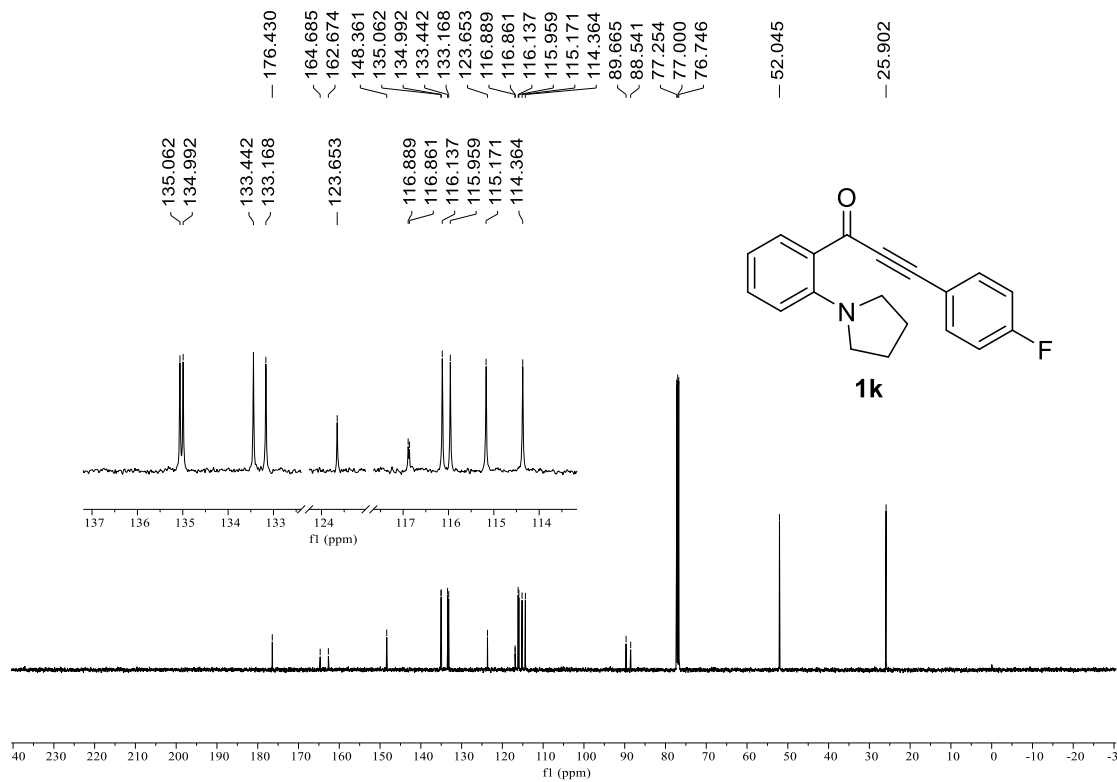

$^1\text{H}$  NMR (500 MHz,  $\text{CDCl}_3$ )

8.200  
8.197  
8.184  
8.181  
7.721  
7.717  
7.709  
7.705  
7.701  
7.638  
7.621  
7.618  
7.605  
7.603  
7.480  
7.465  
7.462  
7.449  
7.402  
7.399  
7.388  
7.385  
7.385  
6.876  
6.860  
6.860  
6.819  
6.817  
6.805  
6.803  
6.801  
6.789  
6.787  
3.241  
3.237  
3.234  
3.228  
3.223  
3.220  
3.215  
2.007  
2.000  
1.994  
1.987  
1.981  
— 0.000

8.200  
8.197  
8.184  
8.181  
7.721  
7.705  
7.638  
7.621  
7.618  
7.605  
7.603  
7.480  
7.465  
7.462  
7.449  
7.402  
7.385  
6.876  
6.860  
6.860  
6.819  
6.805  
6.801

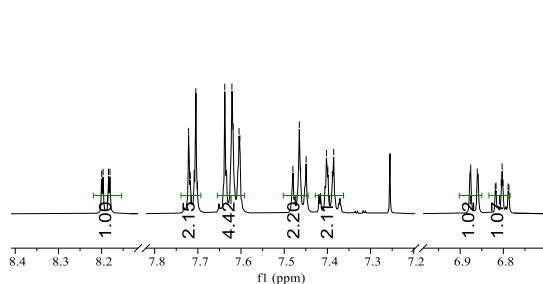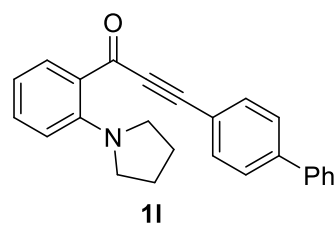

$^{13}\text{C}$  NMR (125 MHz,  $\text{CDCl}_3$ )

176.637  
148.357  
142.999  
139.905  
133.378  
133.331  
133.228  
128.928  
128.030  
127.204  
127.091  
123.844  
119.503  
115.187  
114.338  
90.835  
89.376  
77.254  
77.000  
76.746  
— 52.055  
— 25.913

148.357  
142.999  
139.905  
133.378  
133.331  
133.228  
128.928  
128.030  
127.204  
127.091  
123.844  
119.503  
115.187  
114.338

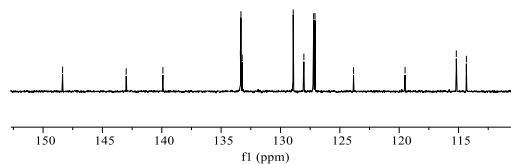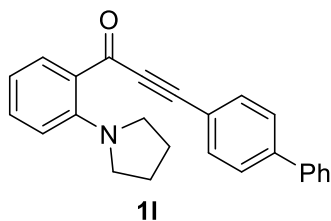

40 230 220 210 200 190 180 170 160 150 140 130 120 110 100 90 80 70 60 50 40 30 20 10 0 -10 -20 -3

<sup>1</sup>H NMR (500 MHz, CDCl<sub>3</sub>)

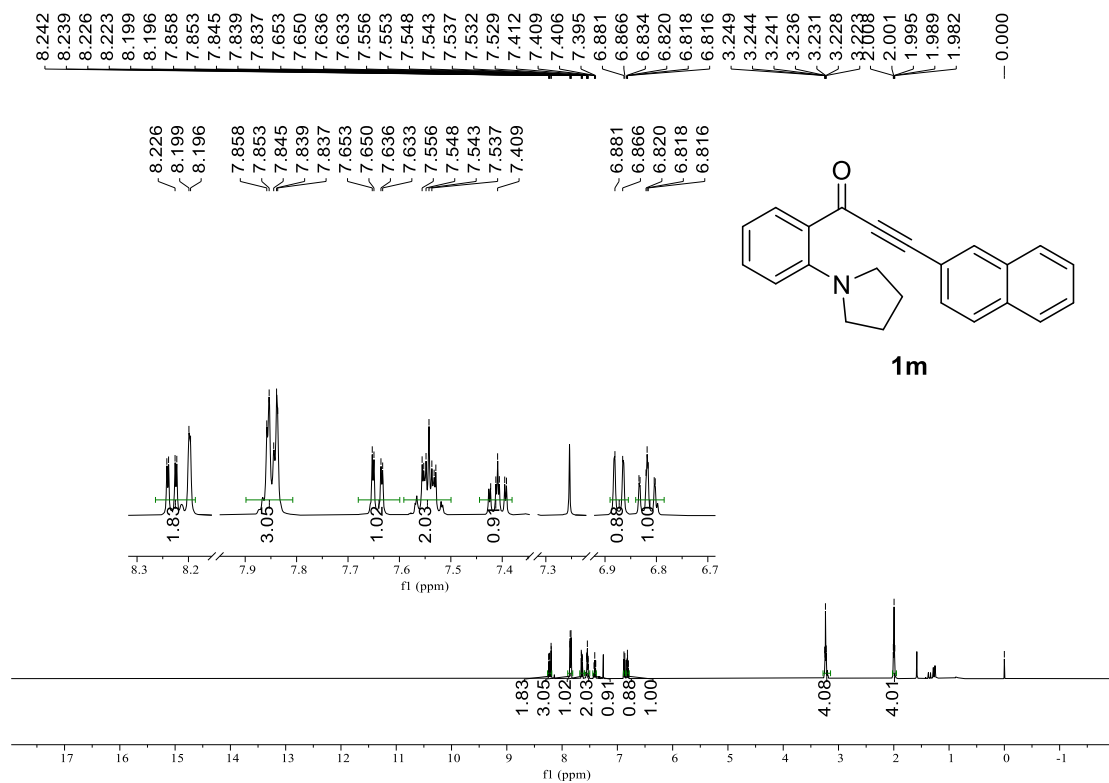

<sup>13</sup>C NMR (125 MHz, CDCl<sub>3</sub>)

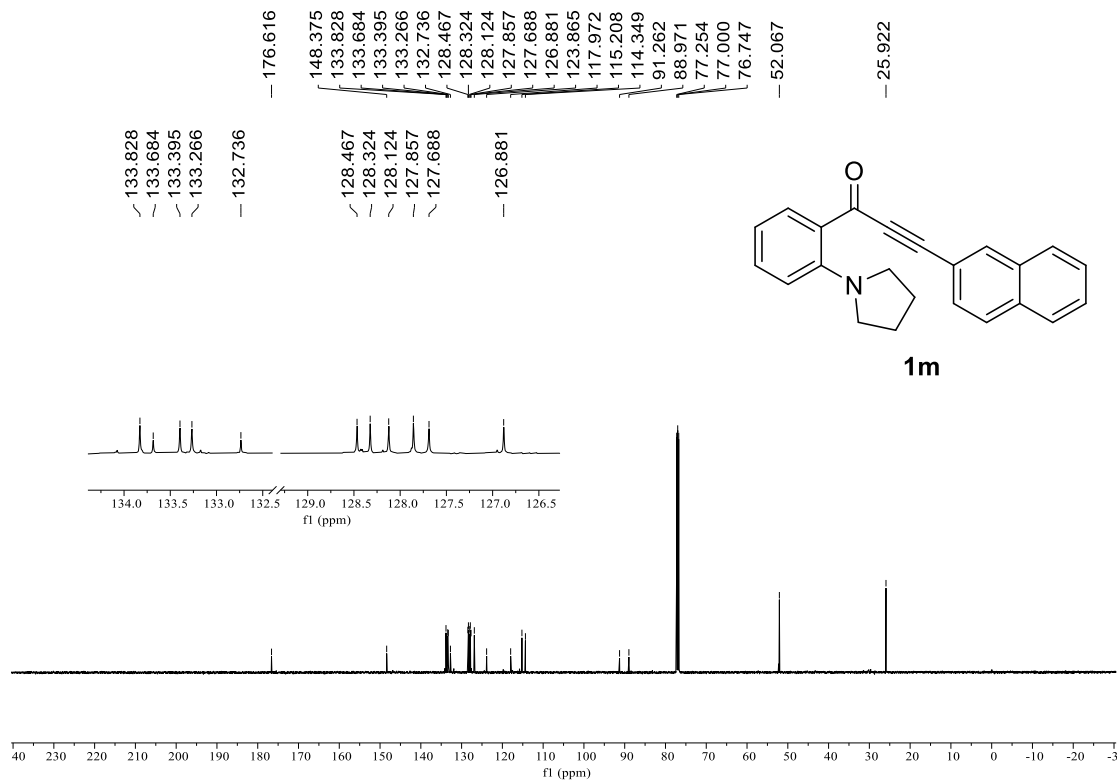



$^1\text{H}$  NMR (500 MHz,  $\text{CDCl}_3$ )

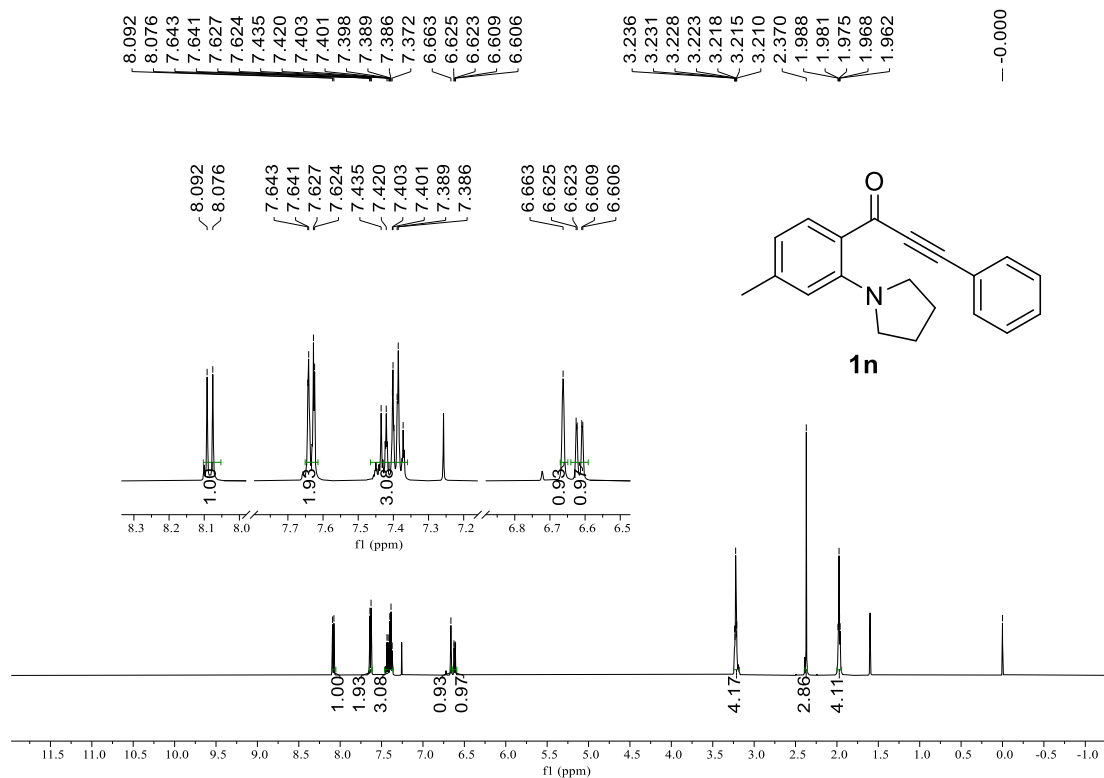

$^{13}\text{C}$  NMR (125 MHz,  $\text{CDCl}_3$ )

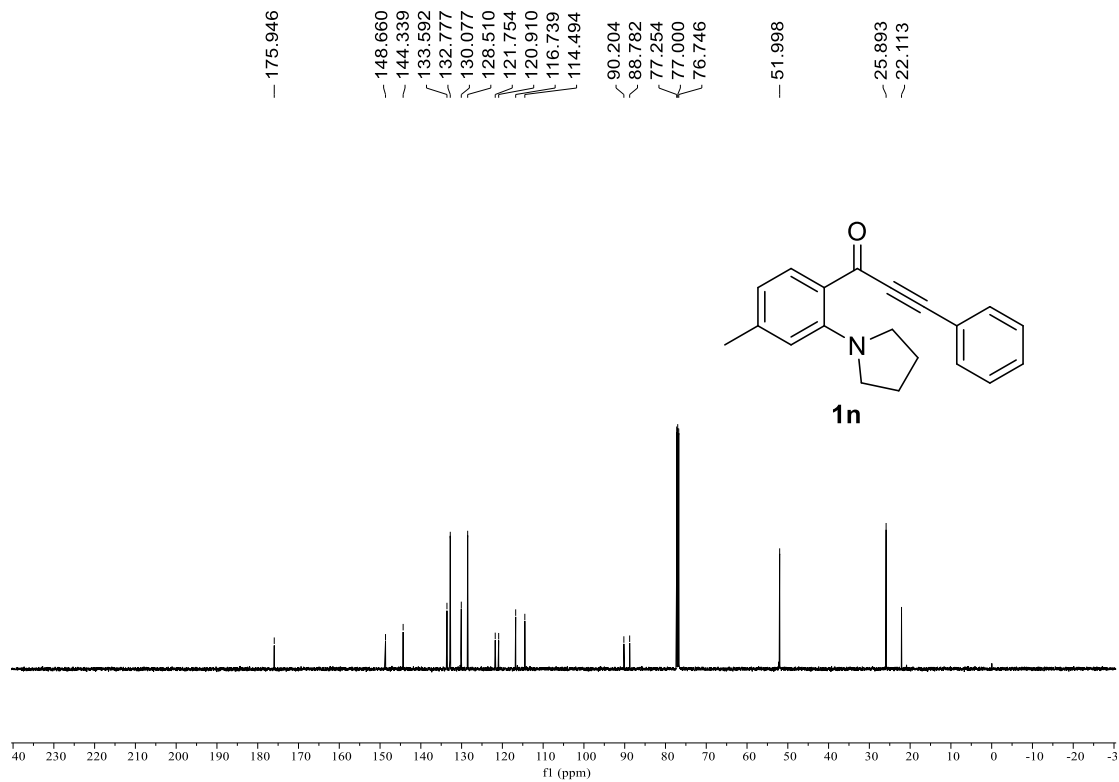

<sup>1</sup>H NMR (500 MHz, CDCl<sub>3</sub>)

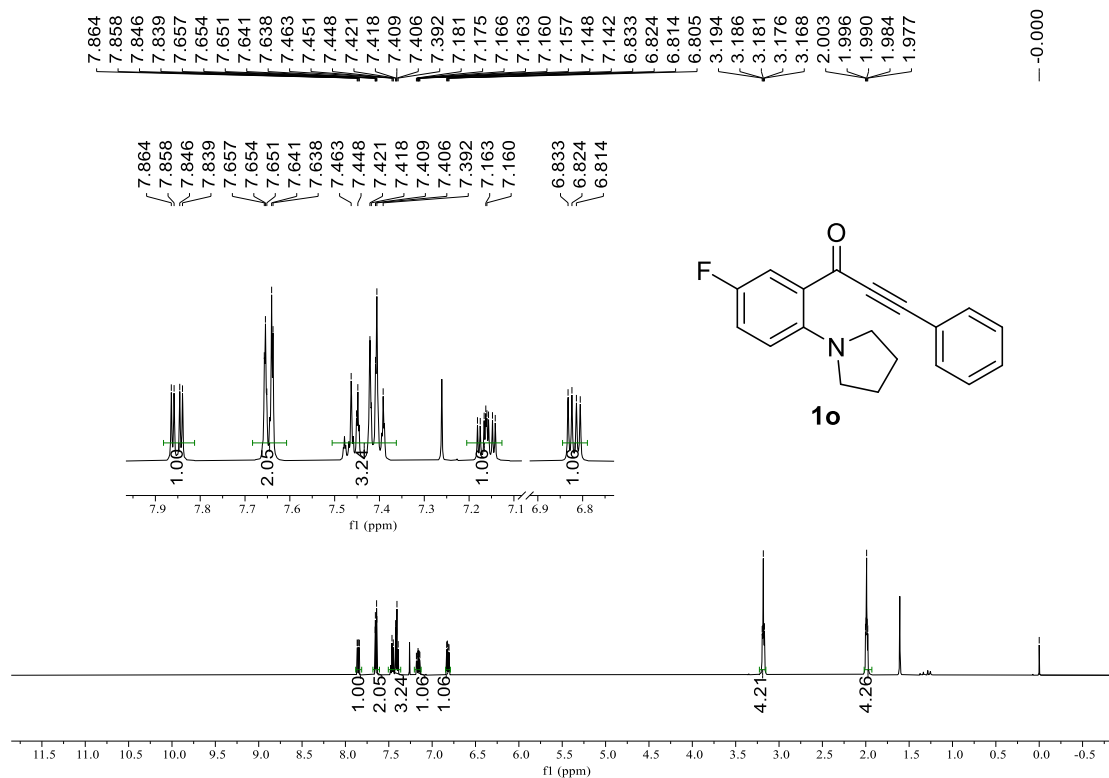

<sup>13</sup>C NMR (125 MHz, CDCl<sub>3</sub>)

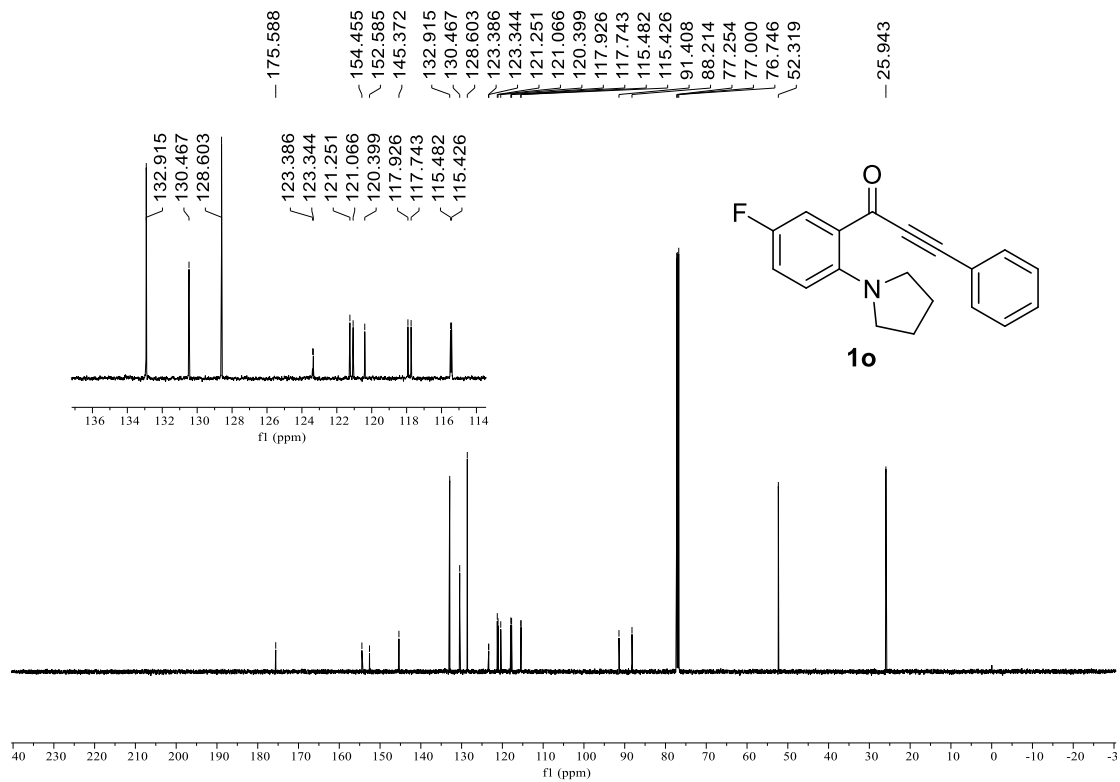

<sup>1</sup>H NMR (500 MHz, CDCl<sub>3</sub>)

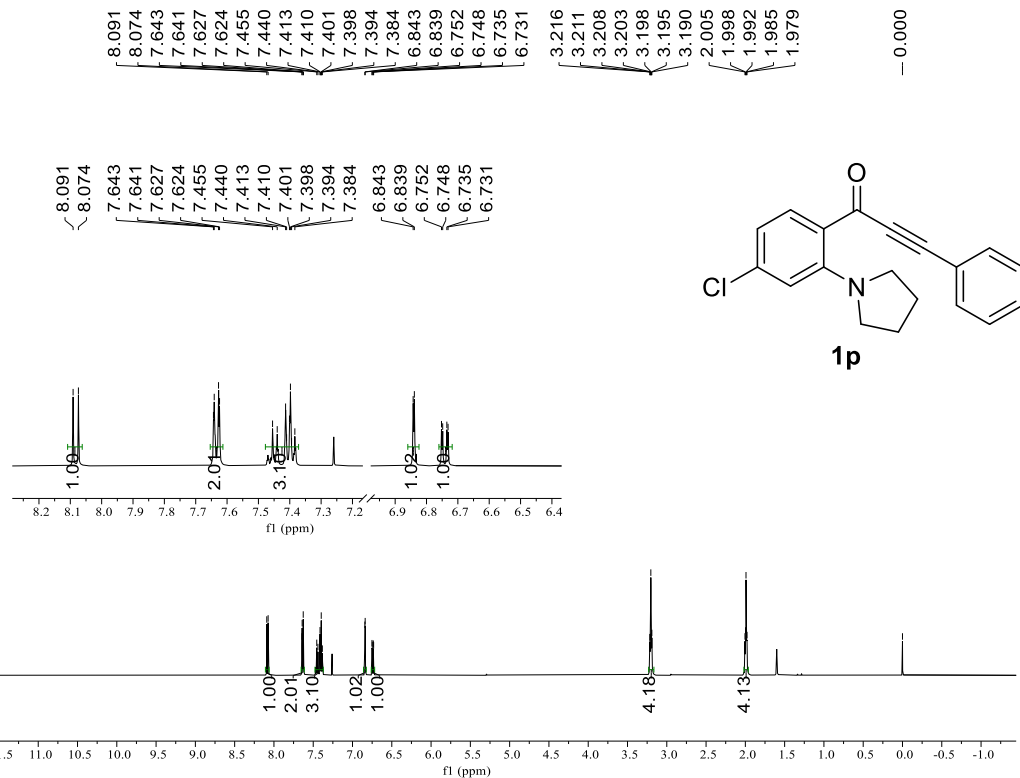

<sup>13</sup>C NMR (125 MHz, CDCl<sub>3</sub>)

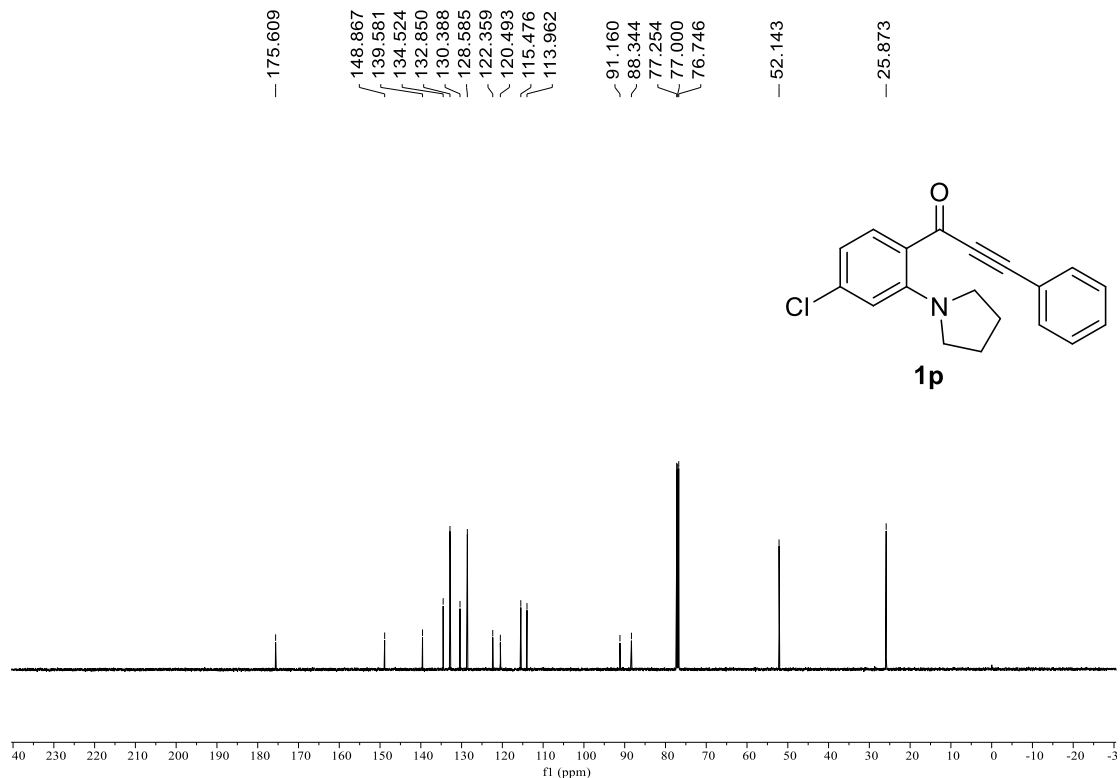

<sup>1</sup>H NMR (500 MHz, CDCl<sub>3</sub>)

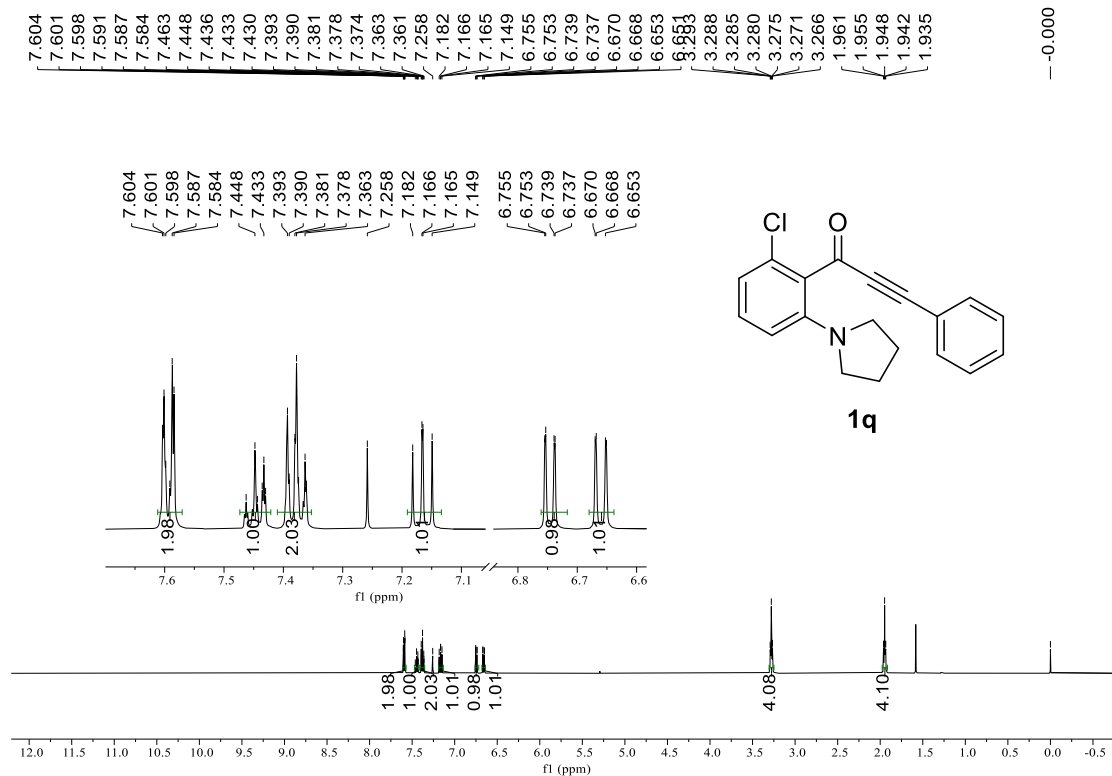

<sup>13</sup>C NMR (125 MHz, CDCl<sub>3</sub>)

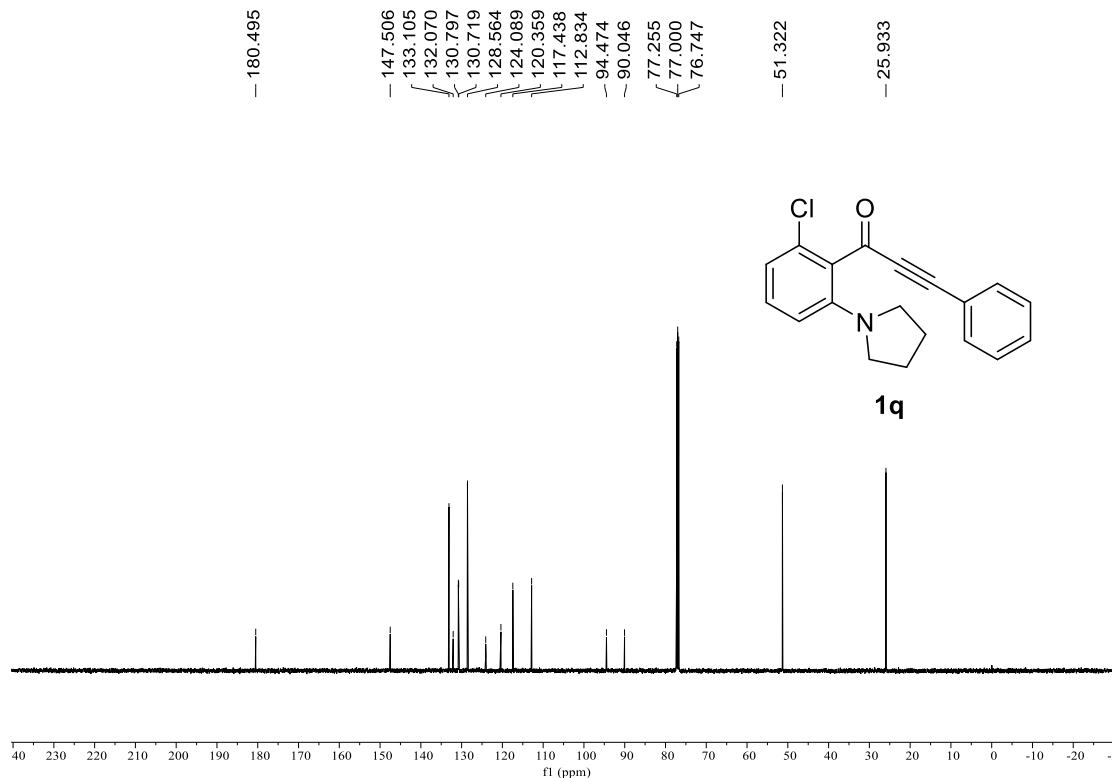

<sup>1</sup>H NMR (500 MHz, CDCl<sub>3</sub>)

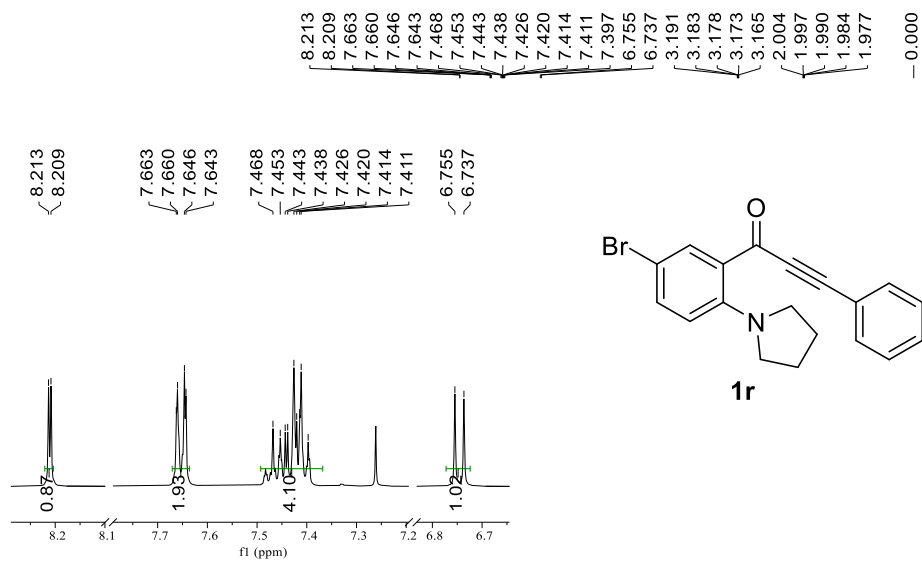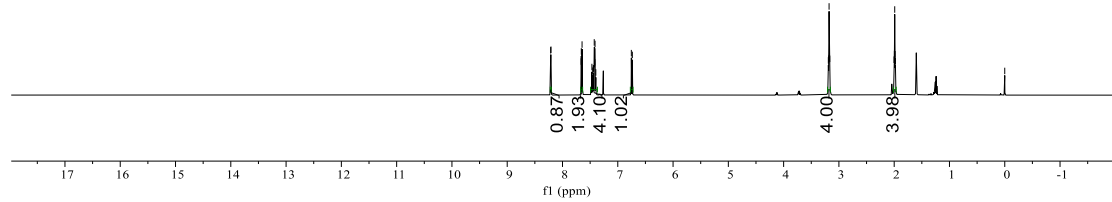

<sup>13</sup>C NMR (125 MHz, CDCl<sub>3</sub>)

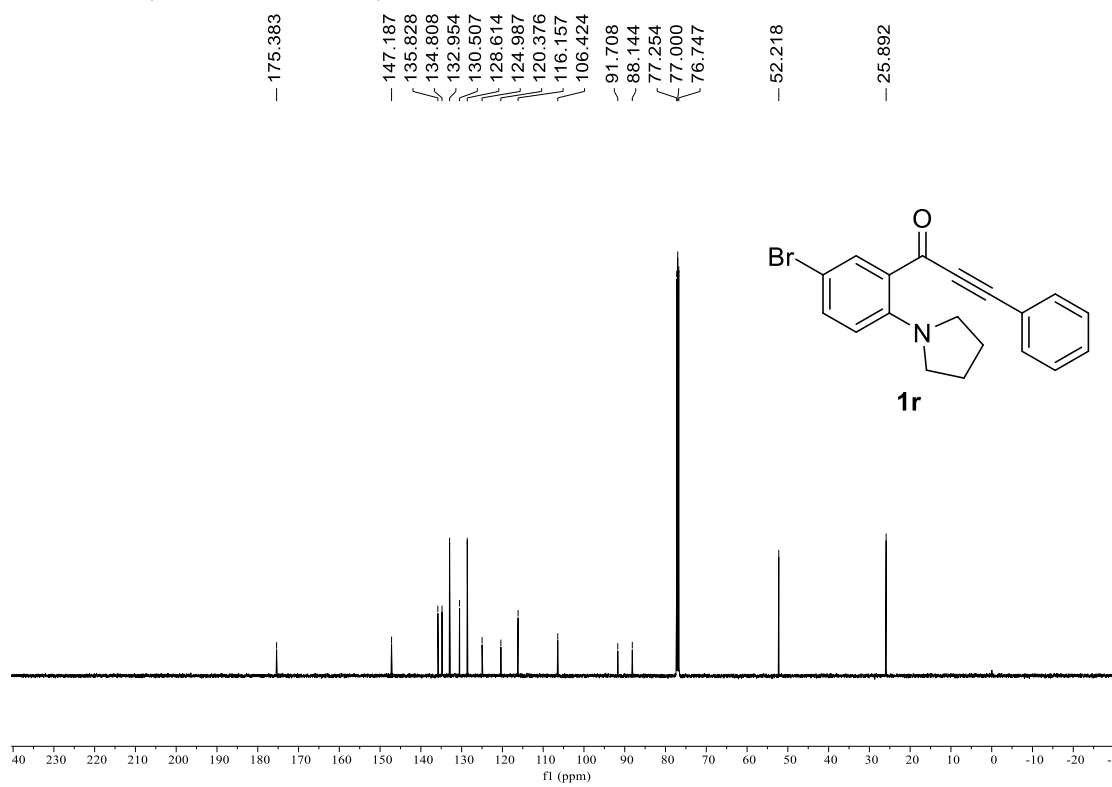

<sup>1</sup>H NMR (500 MHz, CDCl<sub>3</sub>)

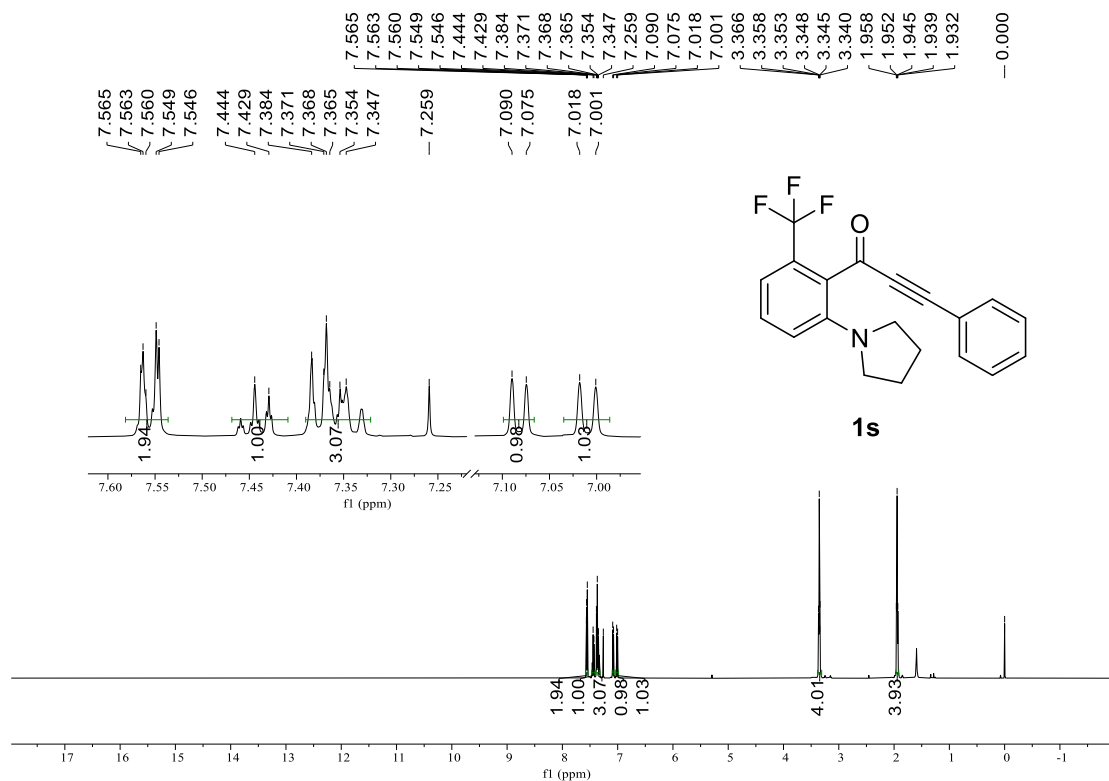

<sup>13</sup>C NMR (125 MHz, CDCl<sub>3</sub>)

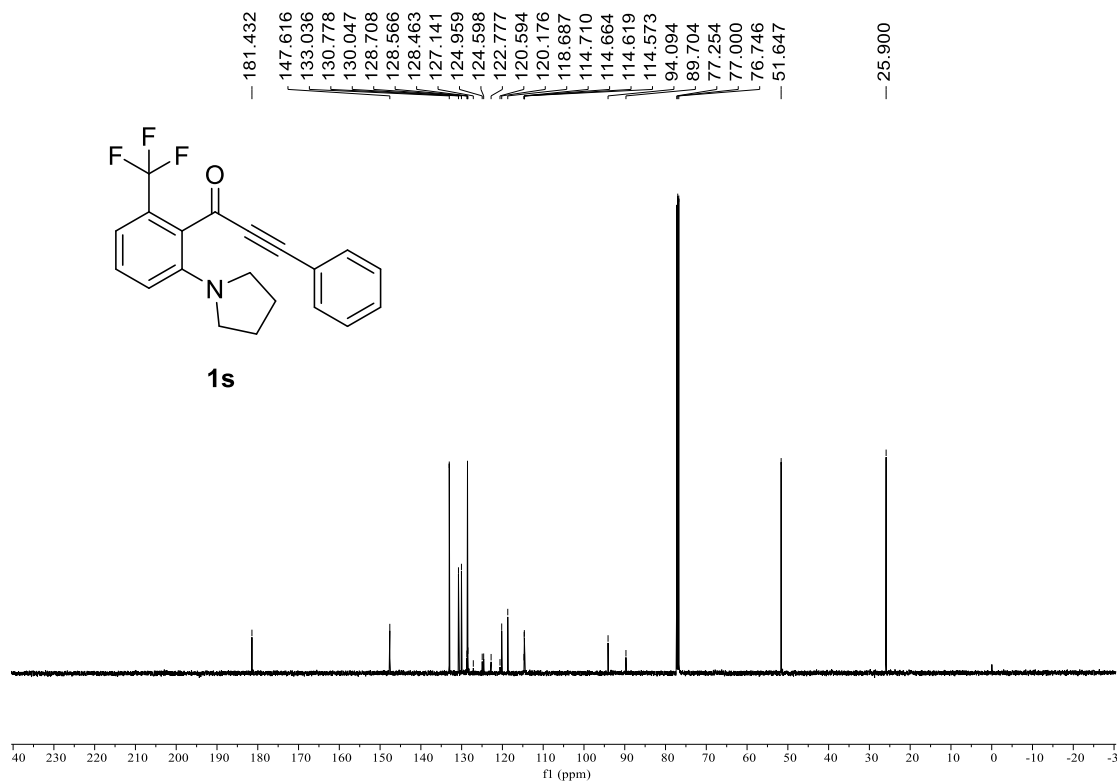

<sup>1</sup>H NMR (500 MHz, CDCl<sub>3</sub>)

8.076  
8.073  
8.060  
8.057  
8.057  
7.375  
7.372  
7.361  
7.358  
7.355  
7.344  
7.341  
7.262  
7.262  
6.829  
6.827  
6.812  
6.810  
6.762  
6.759  
6.748  
6.746  
6.743  
6.732  
6.730  
3.177  
3.172  
3.169  
3.164  
3.159  
3.156  
3.151  
2.107  
1.976  
1.970  
1.968  
1.963  
1.957  
1.955  
1.950  
0.000

8.076  
8.073  
8.060  
8.057  
7.372  
7.361  
7.358  
7.355  
7.344  
7.341  
7.262  
6.829  
6.827  
6.812  
6.810  
6.748  
6.746  
6.743

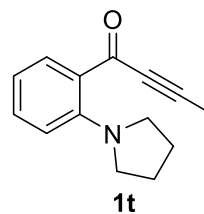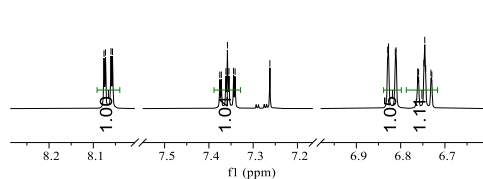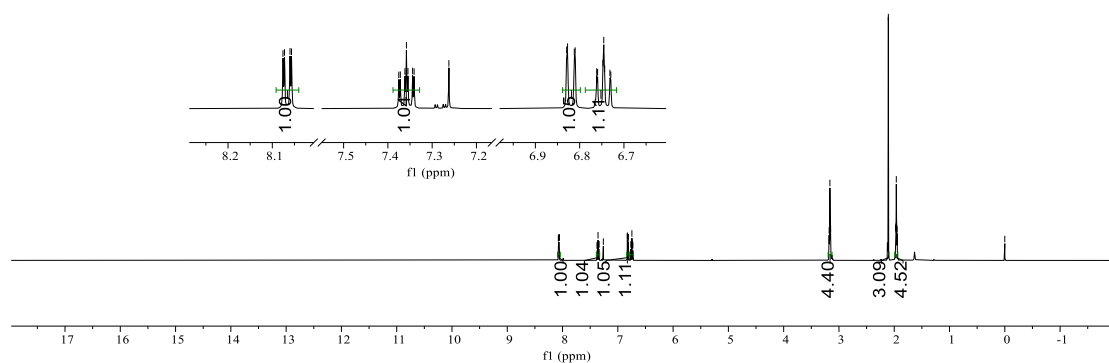

<sup>13</sup>C NMR (125 MHz, CDCl<sub>3</sub>)

177.068  
148.236  
133.267  
133.155  
123.744  
115.024  
114.171  
89.911  
80.616  
77.254  
77.000  
76.746  
51.922  
25.870  
4.256

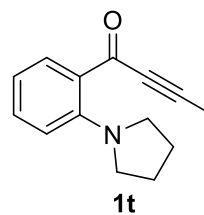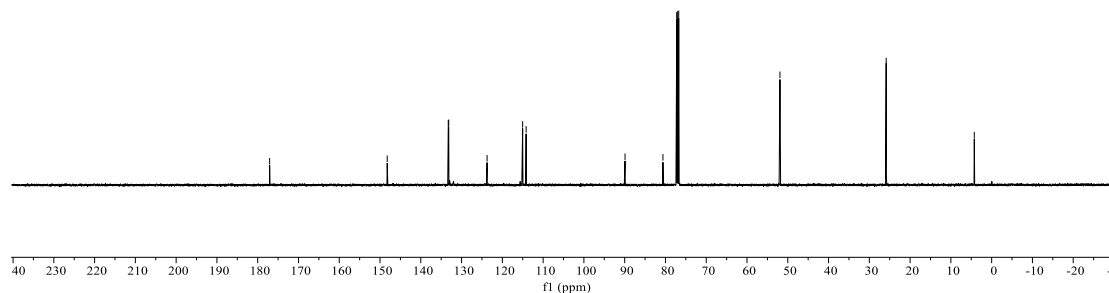

<sup>1</sup>H NMR (500 MHz, CDCl<sub>3</sub>)

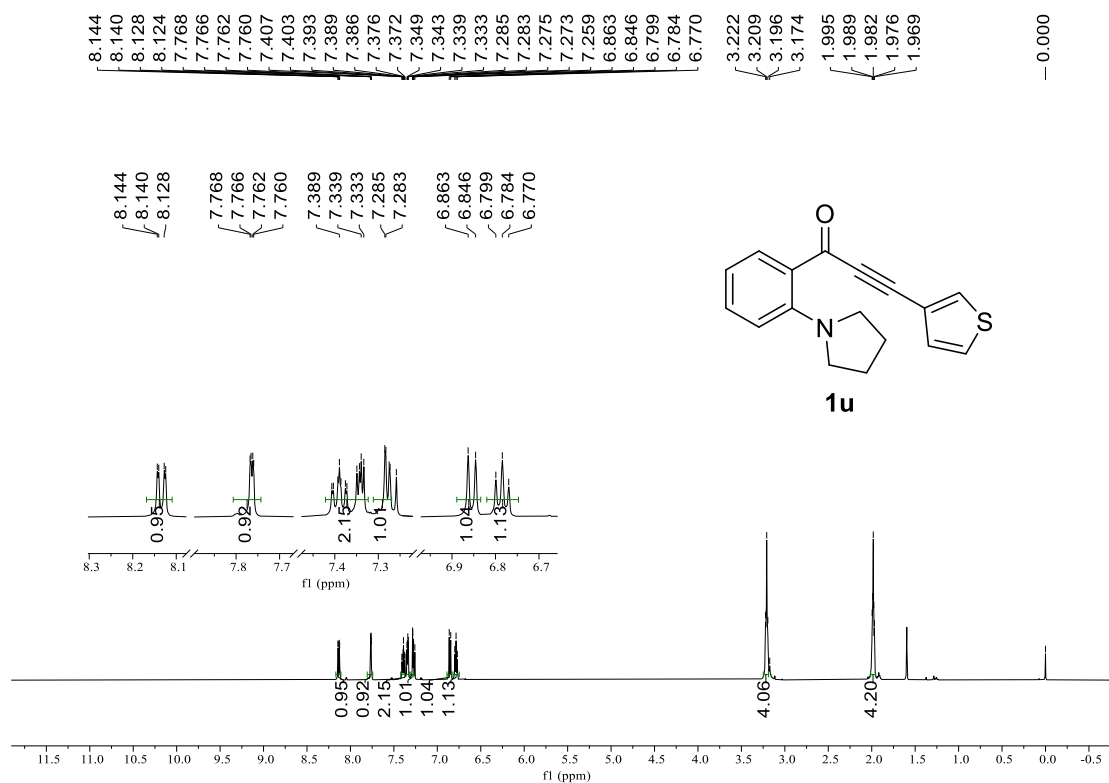

<sup>13</sup>C NMR (125 MHz, CDCl<sub>3</sub>)

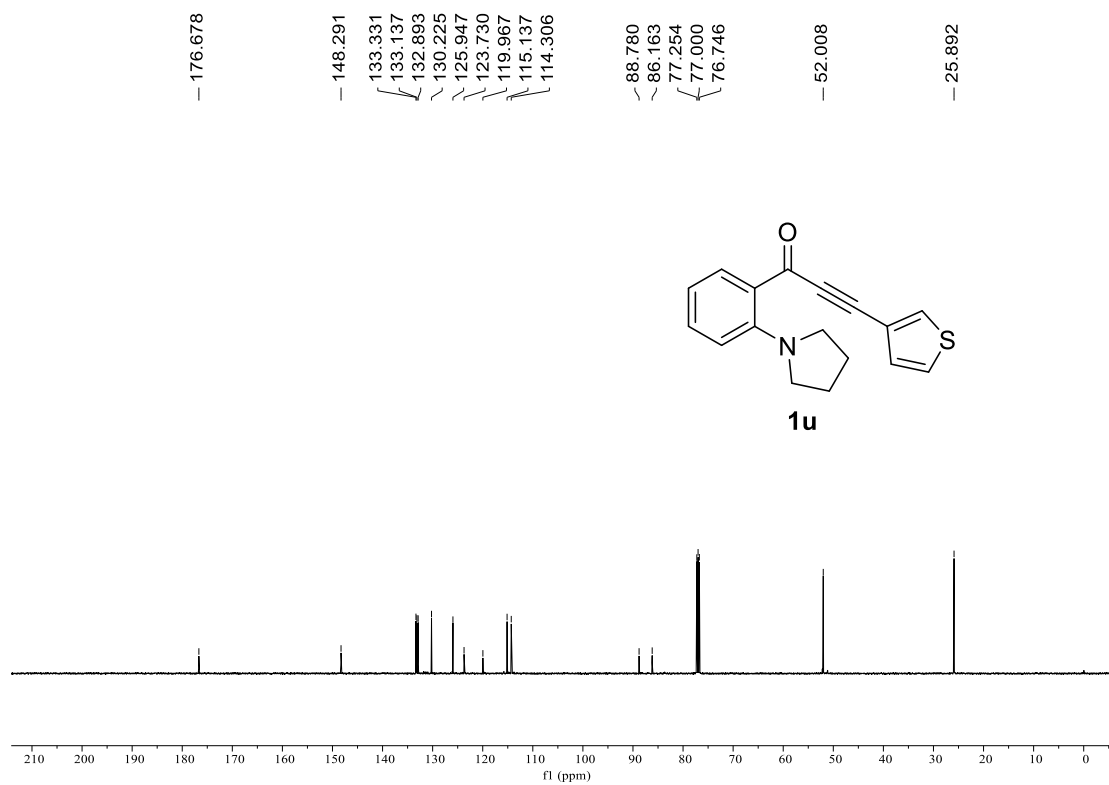



<sup>1</sup>H NMR (500 MHz, CDCl<sub>3</sub>)

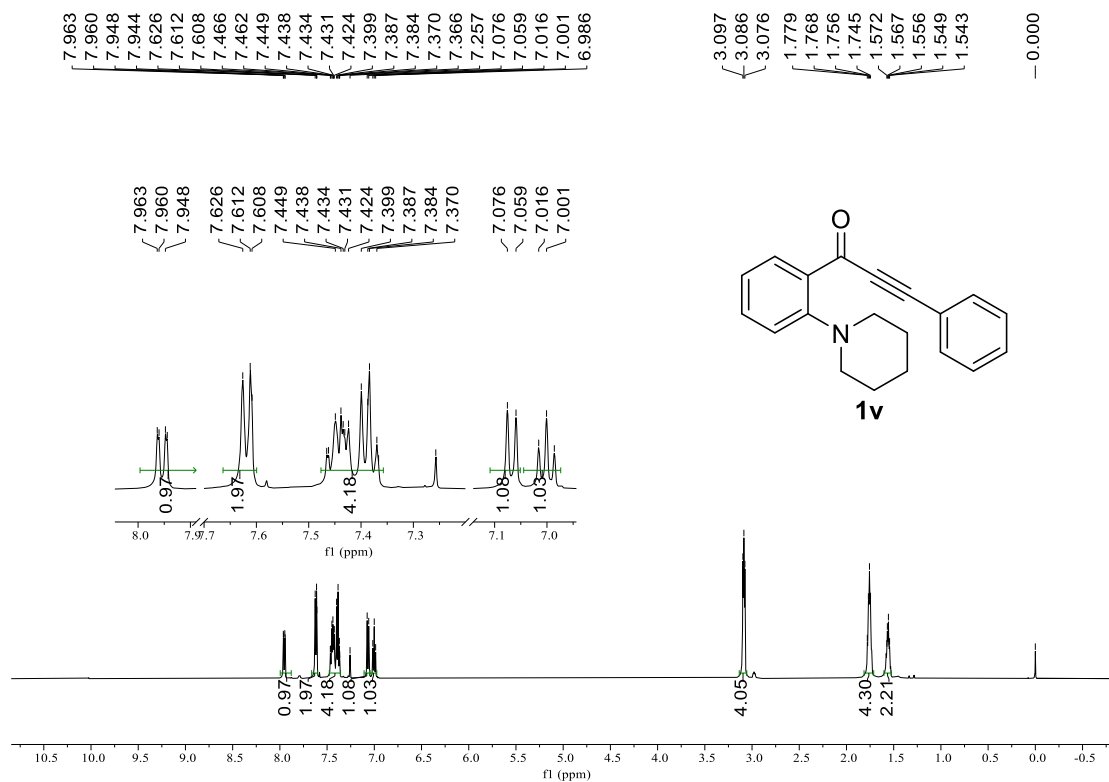

<sup>13</sup>C NMR (125 MHz, CDCl<sub>3</sub>)

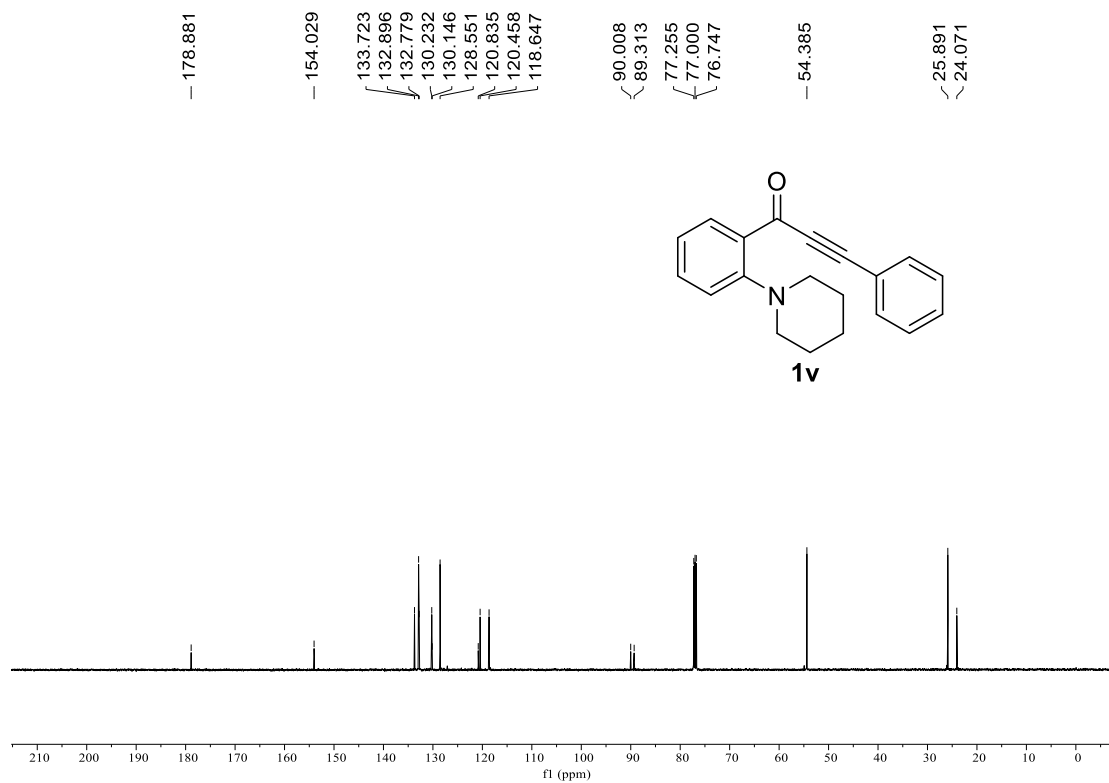

<sup>1</sup>H NMR (500 MHz, CDCl<sub>3</sub>)

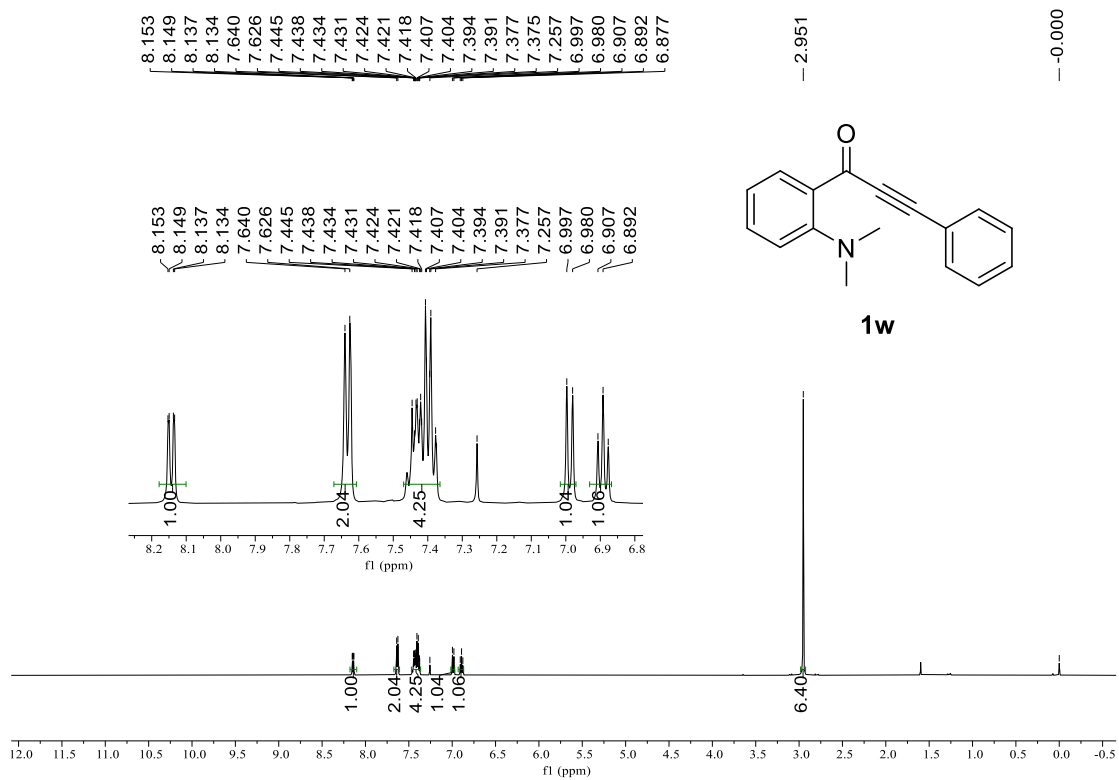

<sup>13</sup>C NMR (125 MHz, CDCl<sub>3</sub>)

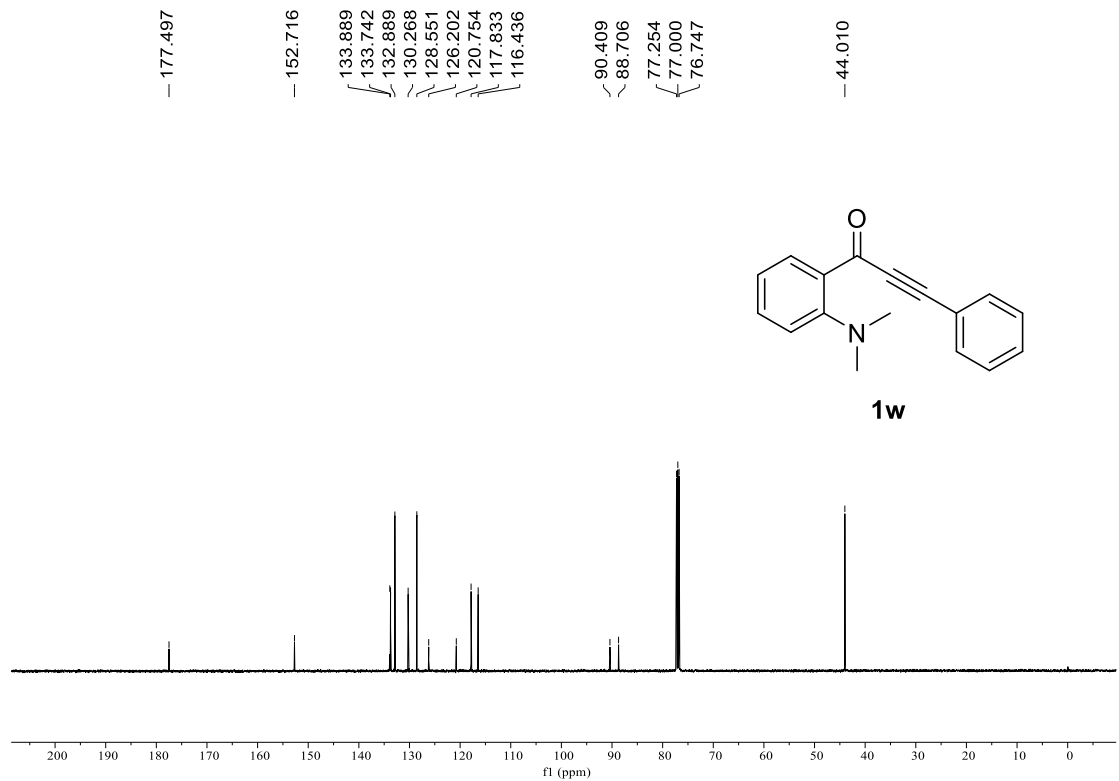

<sup>1</sup>H NMR (500 MHz, CDCl<sub>3</sub>)

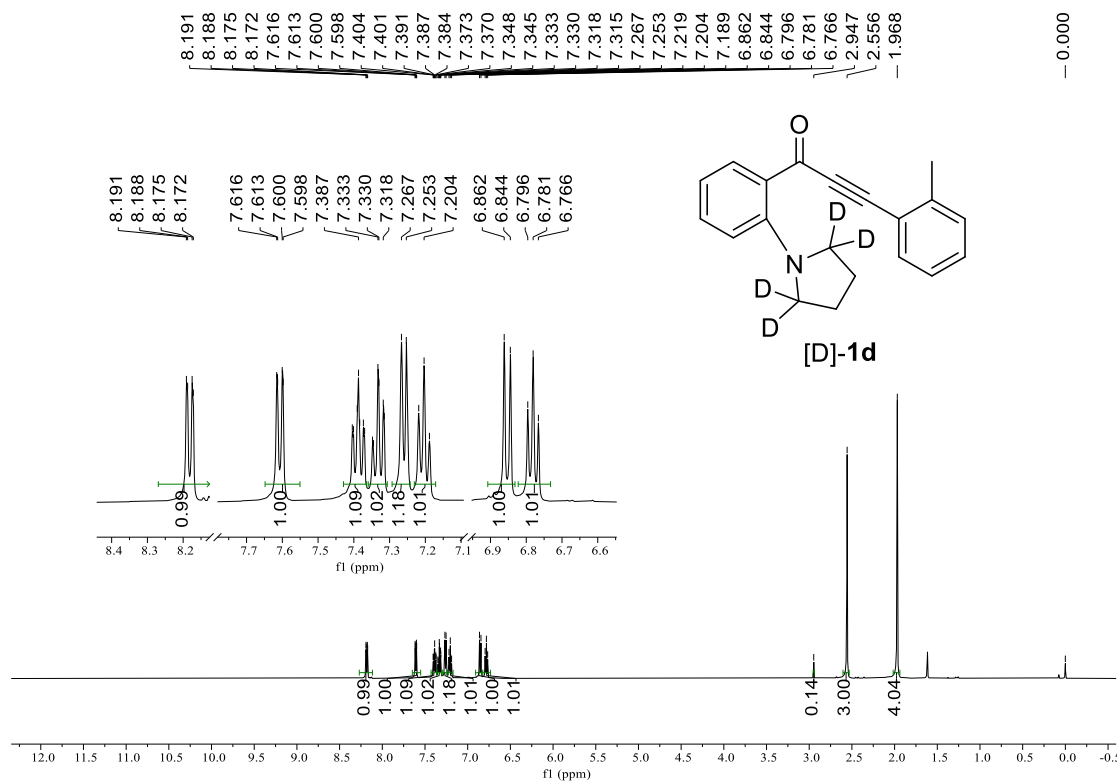

<sup>13</sup>C NMR (125 MHz, CDCl<sub>3</sub>)

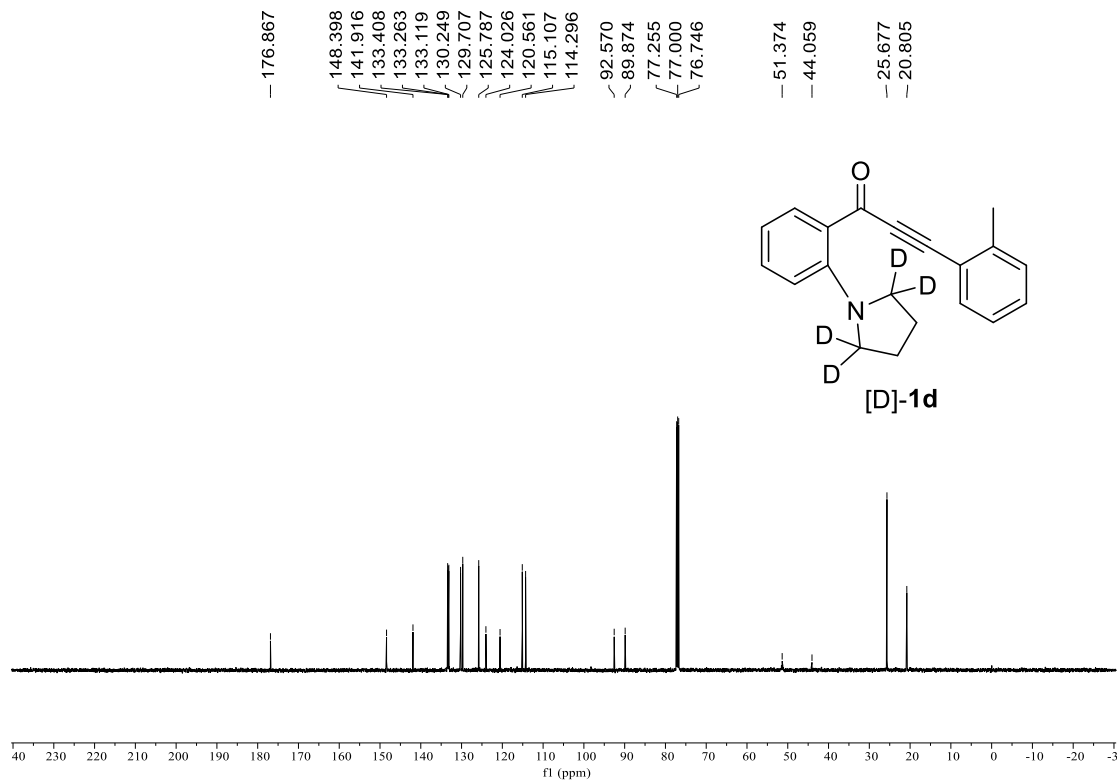

<sup>1</sup>H NMR (500 MHz, CDCl<sub>3</sub>)

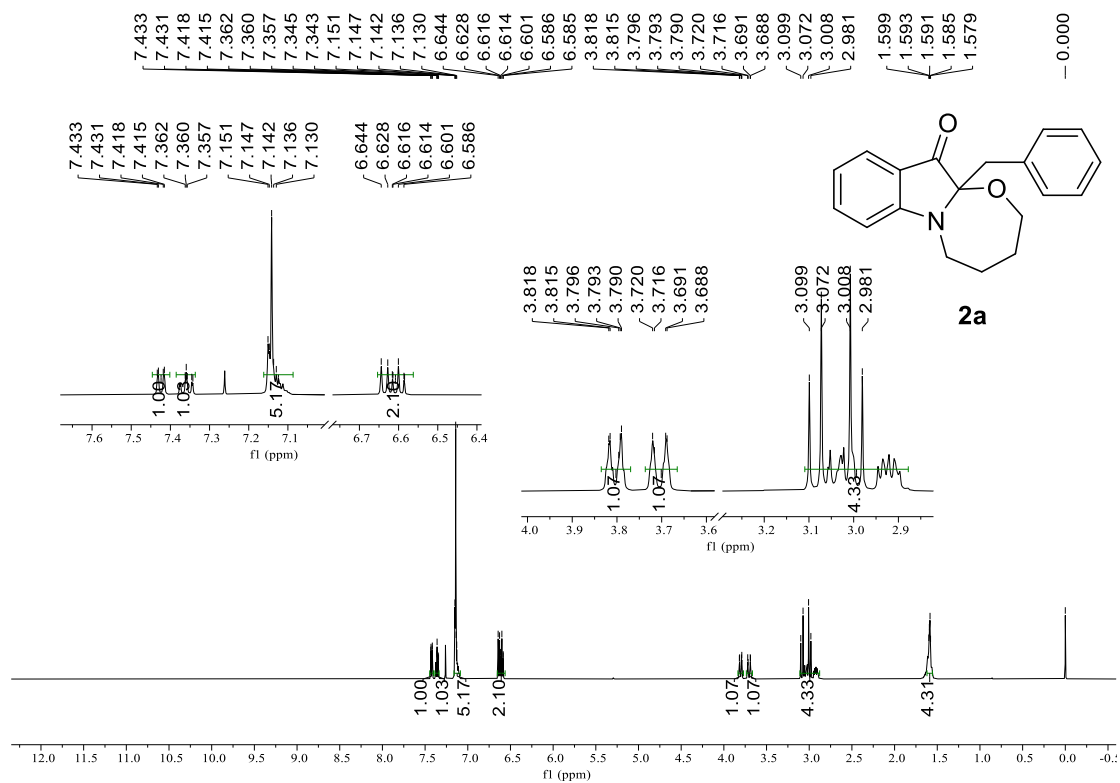

<sup>13</sup>C NMR (125 MHz, CDCl<sub>3</sub>)

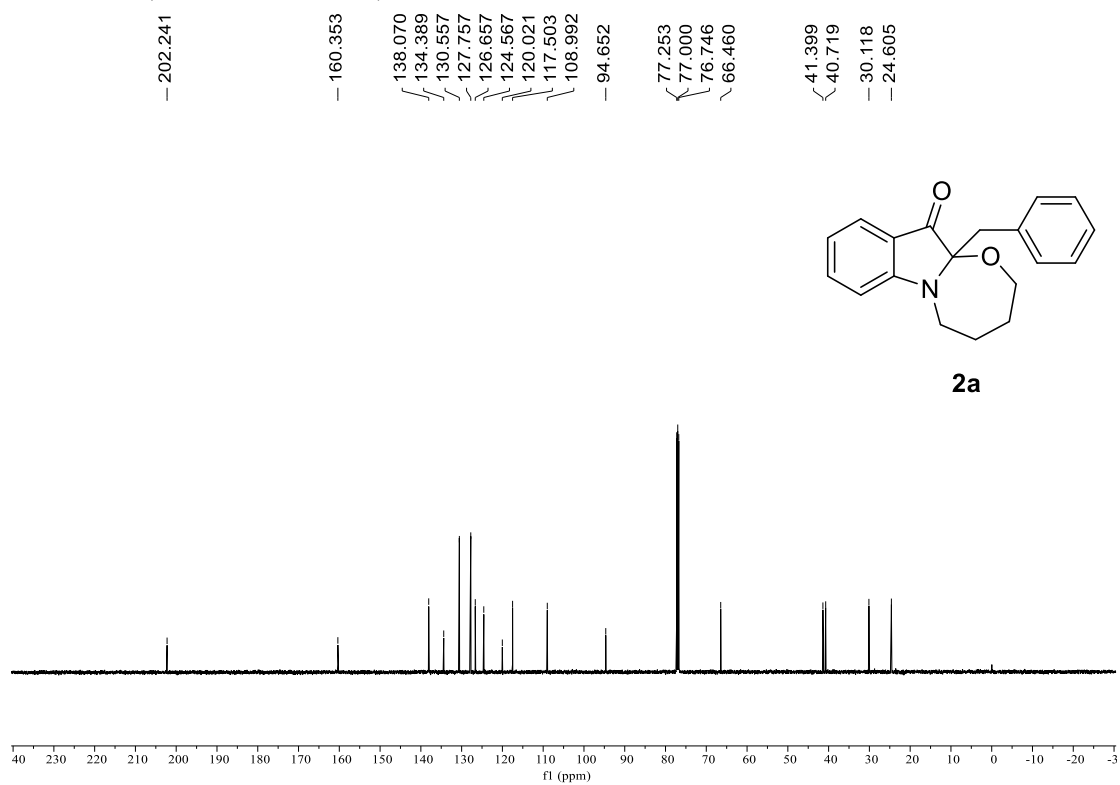

<sup>1</sup>H NMR (500 MHz, CDCl<sub>3</sub>)

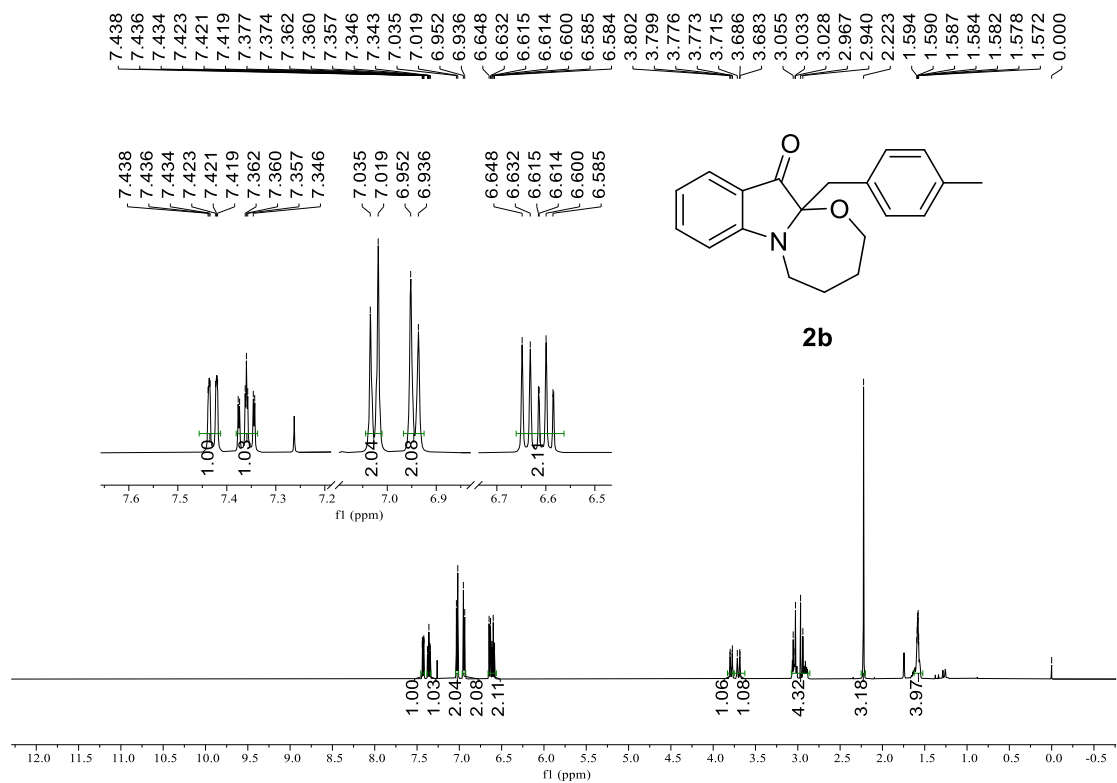

<sup>13</sup>C NMR (125 MHz, CDCl<sub>3</sub>)

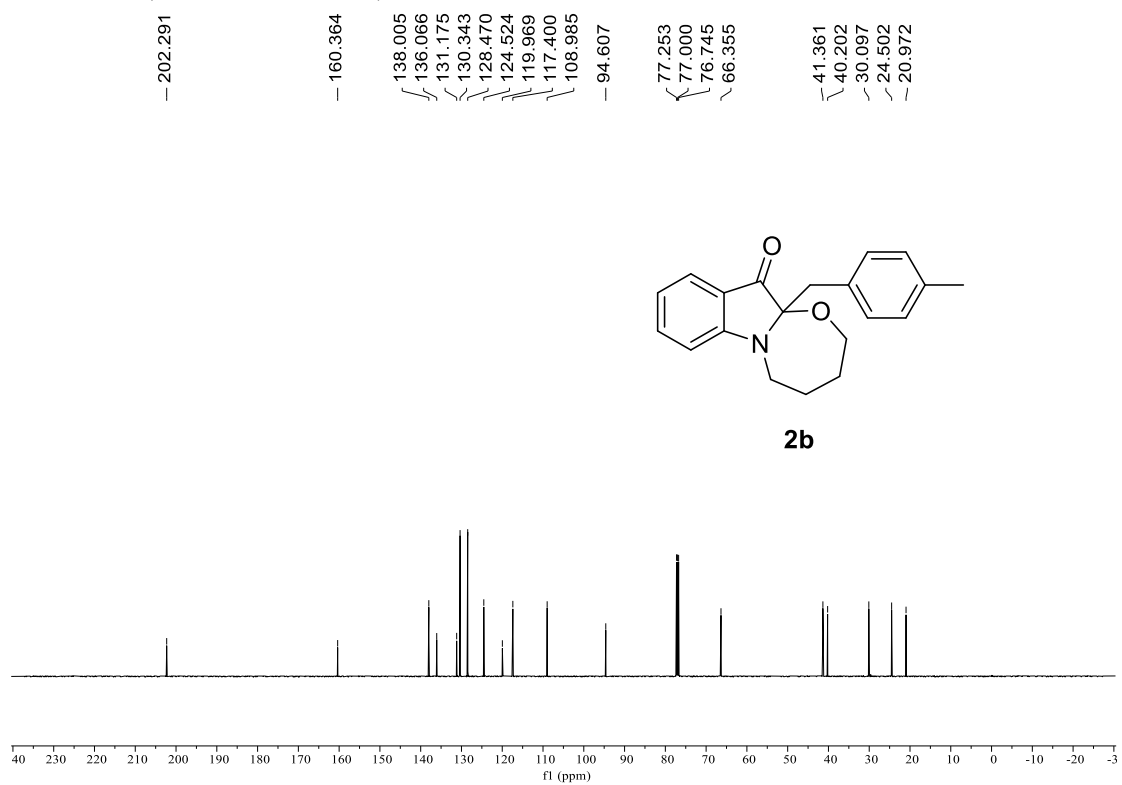

<sup>1</sup>H NMR (500 MHz, CDCl<sub>3</sub>)

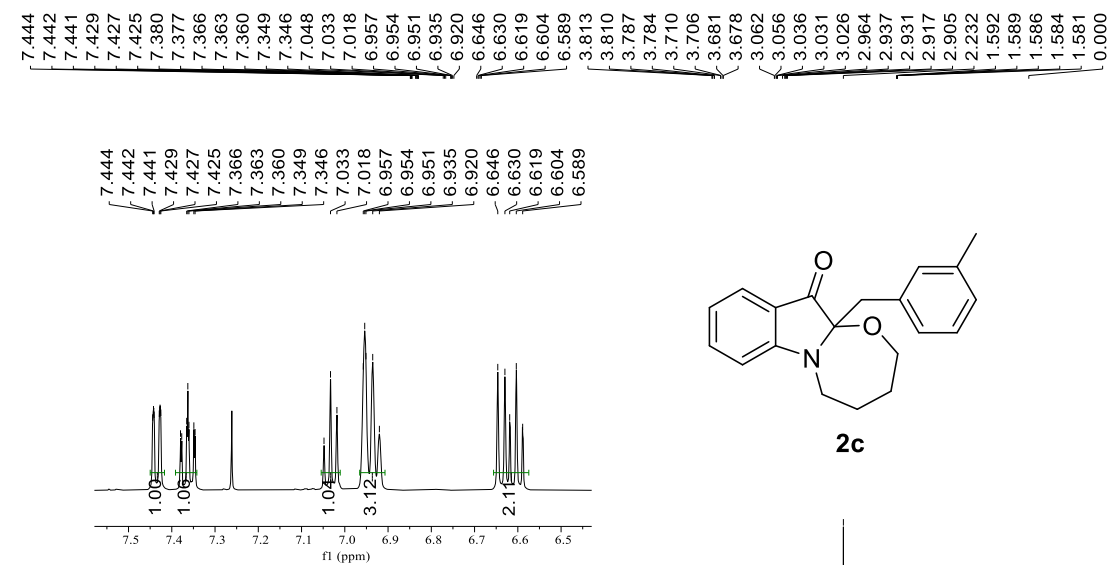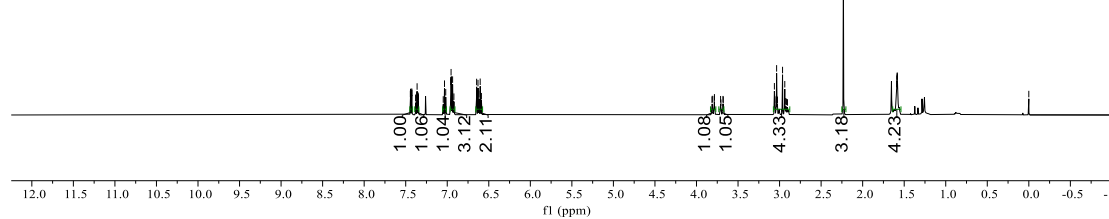

<sup>13</sup>C NMR (125 MHz, CDCl<sub>3</sub>)

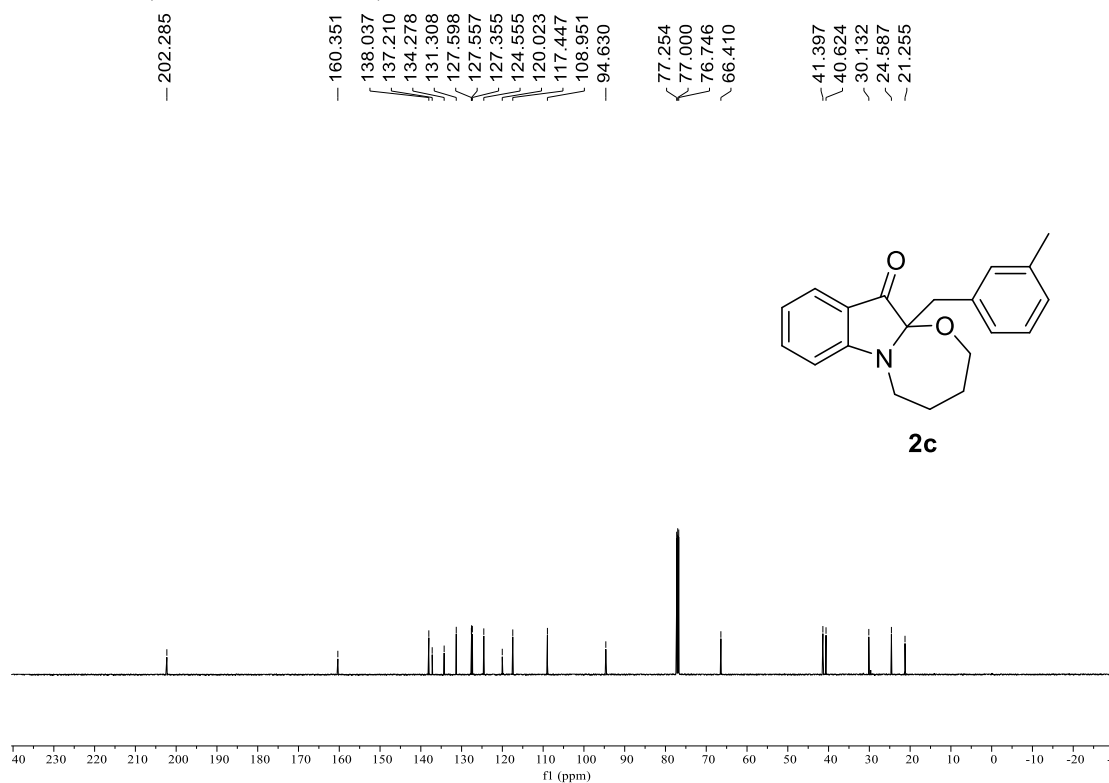

$^1\text{H}$  NMR (500 MHz,  $\text{CDCl}_3$ )

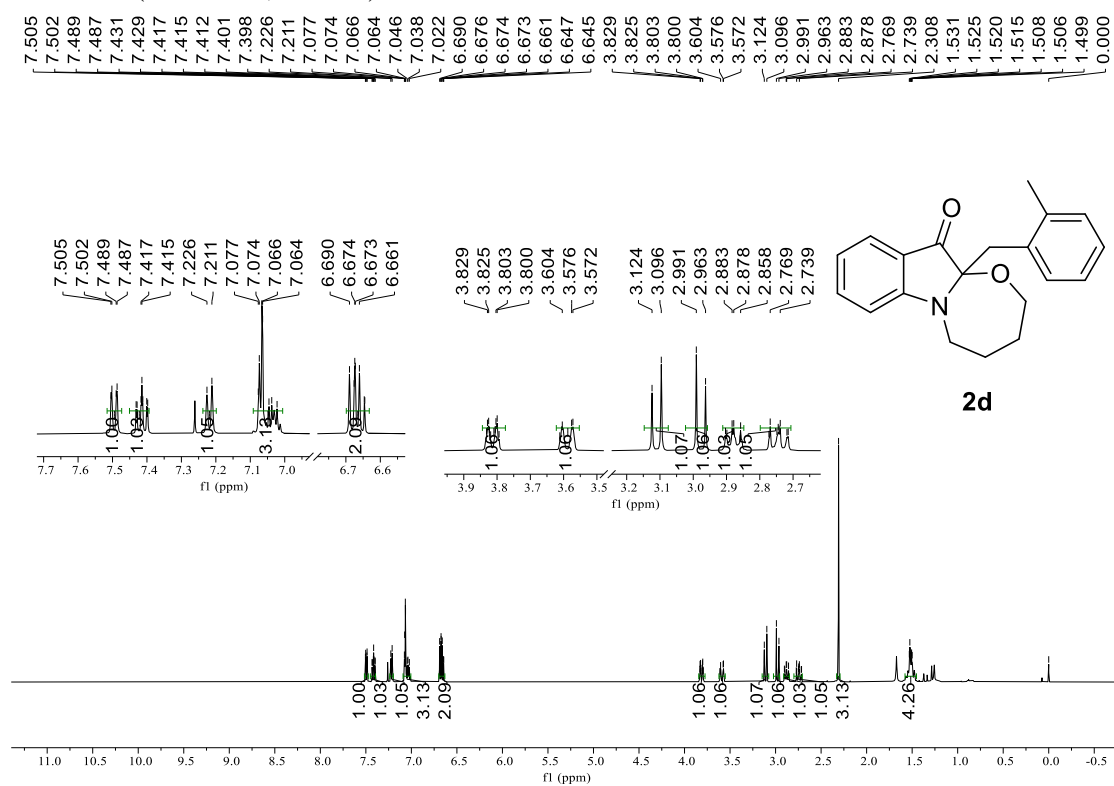

$^{13}\text{C}$  NMR (125 MHz,  $\text{CDCl}_3$ )

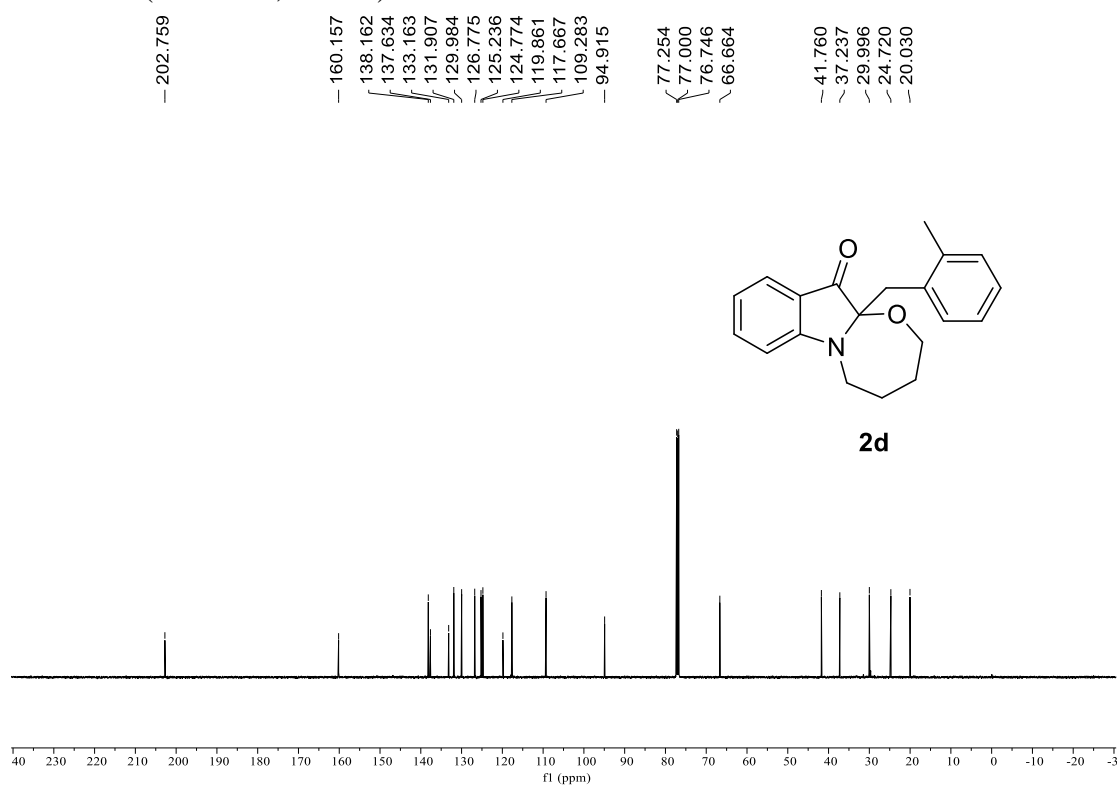

$^1\text{H}$  NMR (500 MHz,  $\text{CDCl}_3$ )

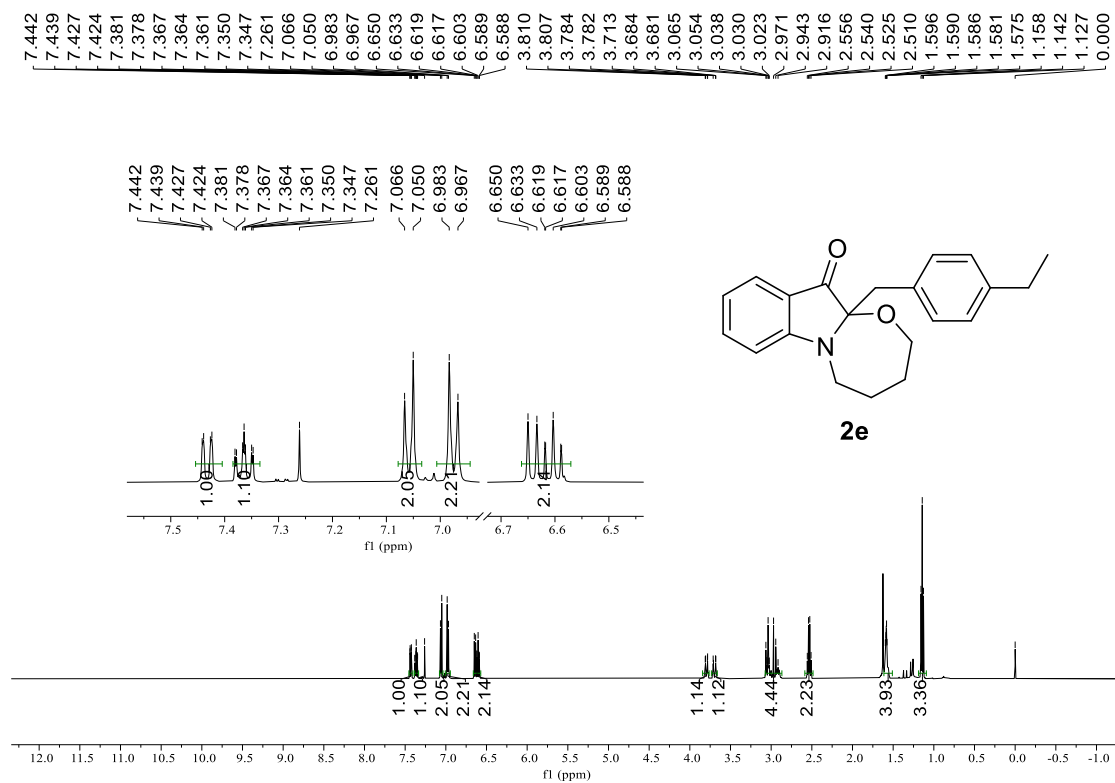

$^{13}\text{C}$  NMR (125 MHz,  $\text{CDCl}_3$ )

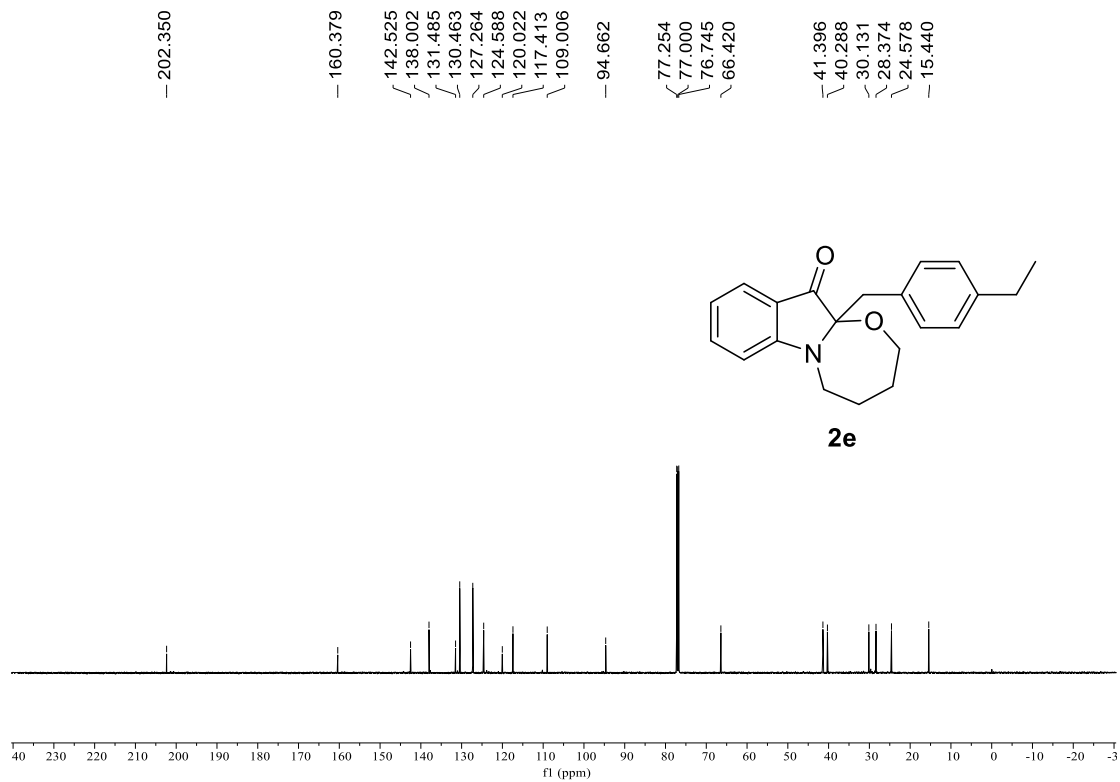



<sup>1</sup>H NMR (500 MHz, CDCl<sub>3</sub>)

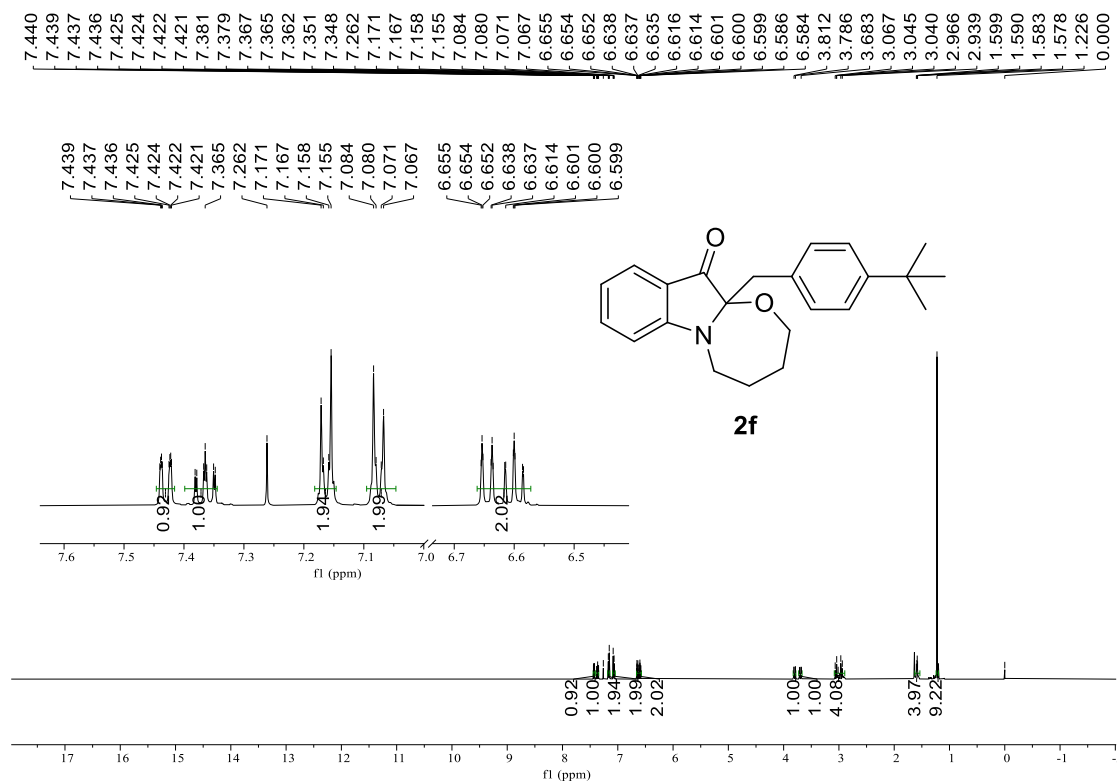

<sup>13</sup>C NMR (125 MHz, CDCl<sub>3</sub>)

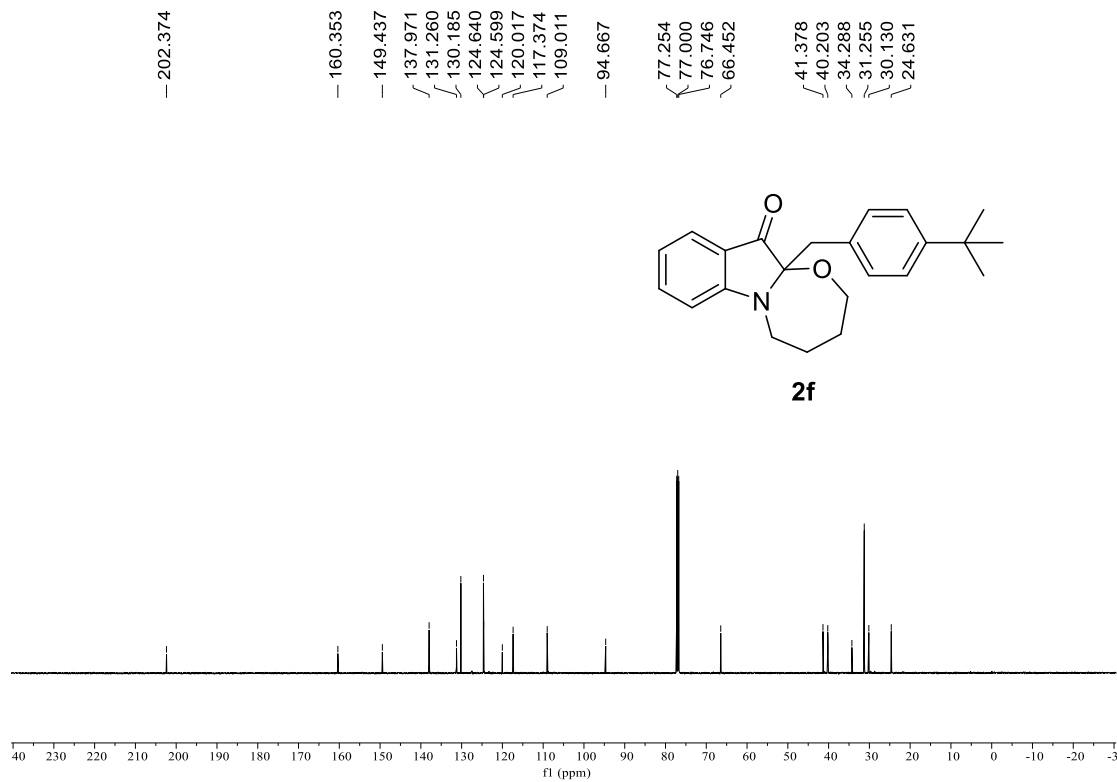

<sup>1</sup>H NMR (500 MHz, CDCl<sub>3</sub>)

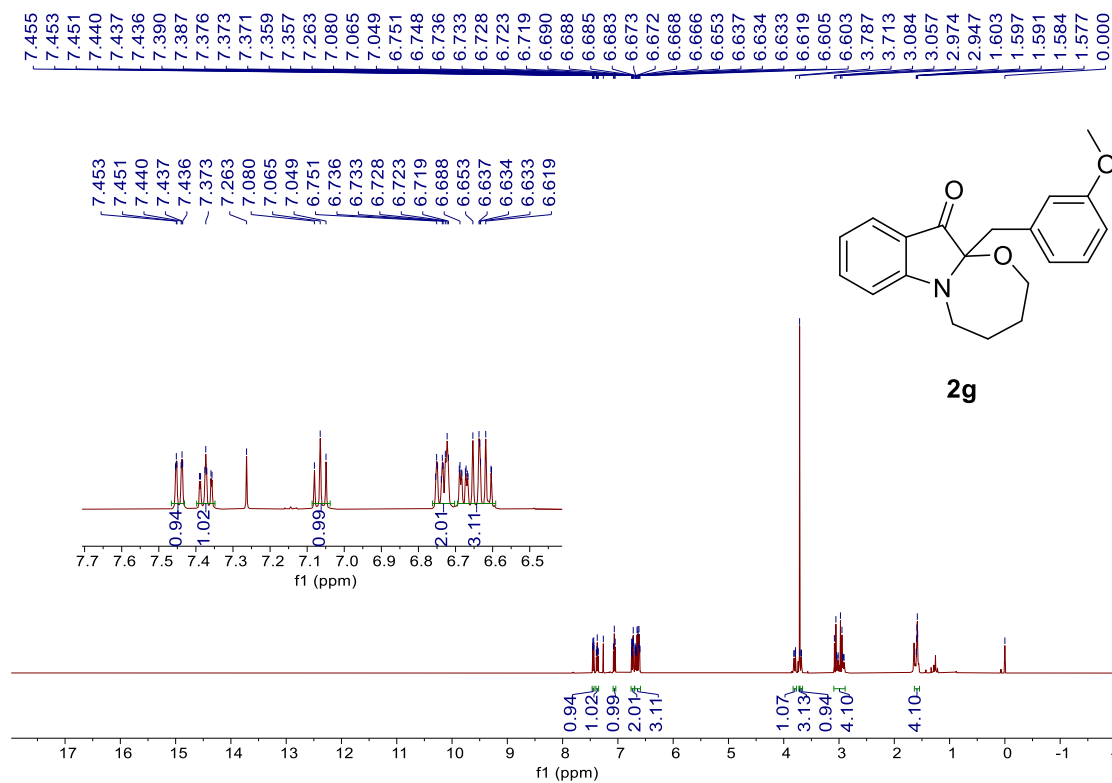

<sup>13</sup>C NMR (125 MHz, CDCl<sub>3</sub>)

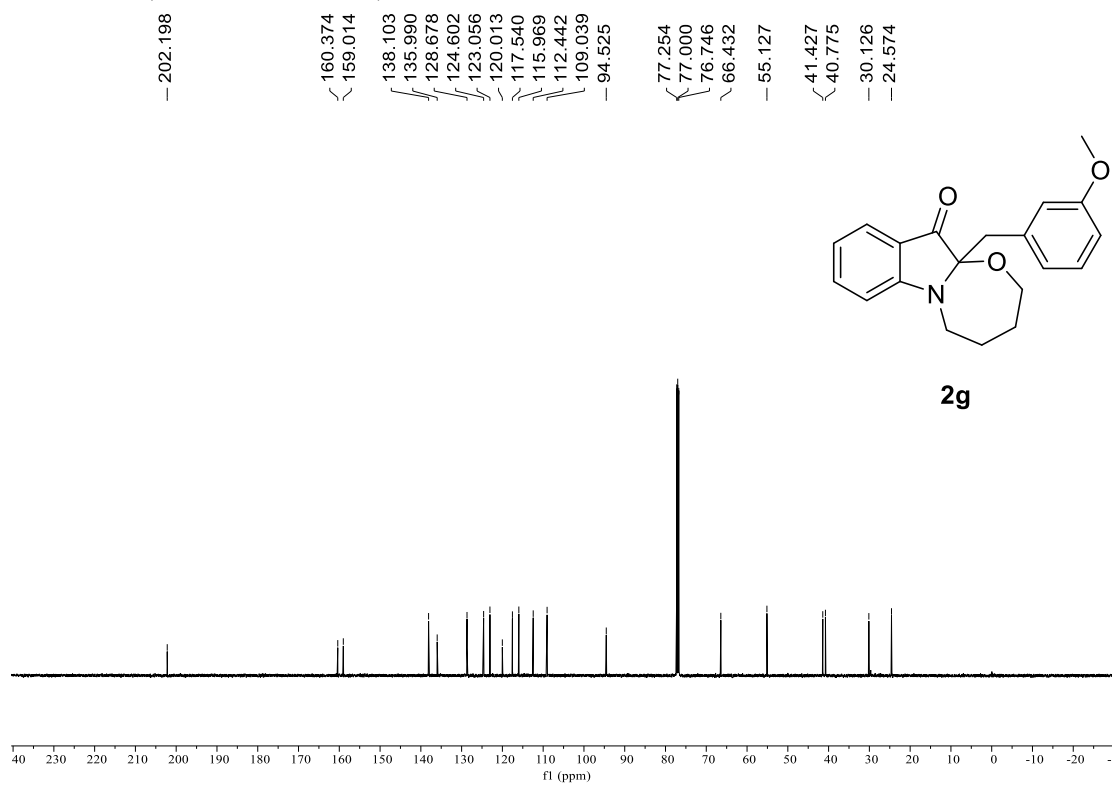

$^1\text{H}$  NMR (600 MHz,  $\text{CDCl}_3$ )

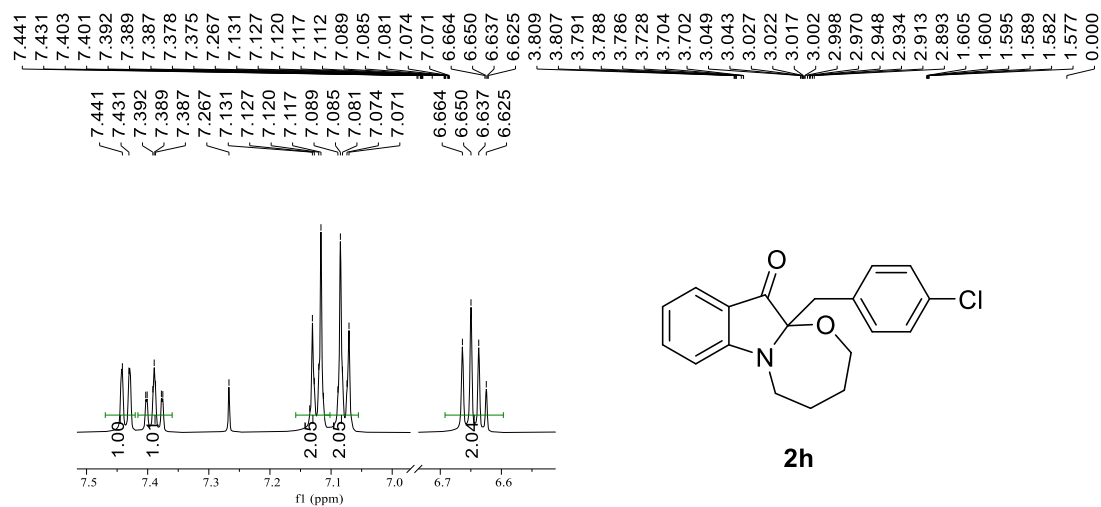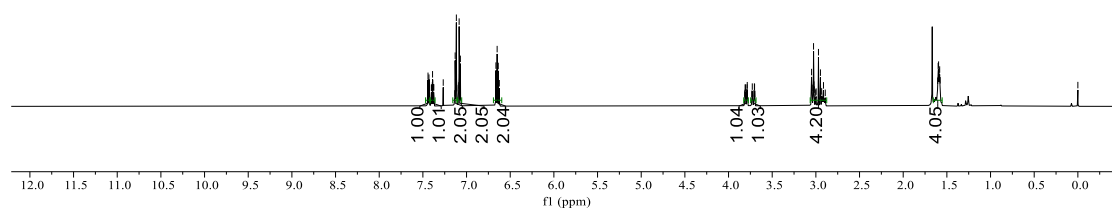

$^{13}\text{C}$  NMR (150 MHz,  $\text{CDCl}_3$ )

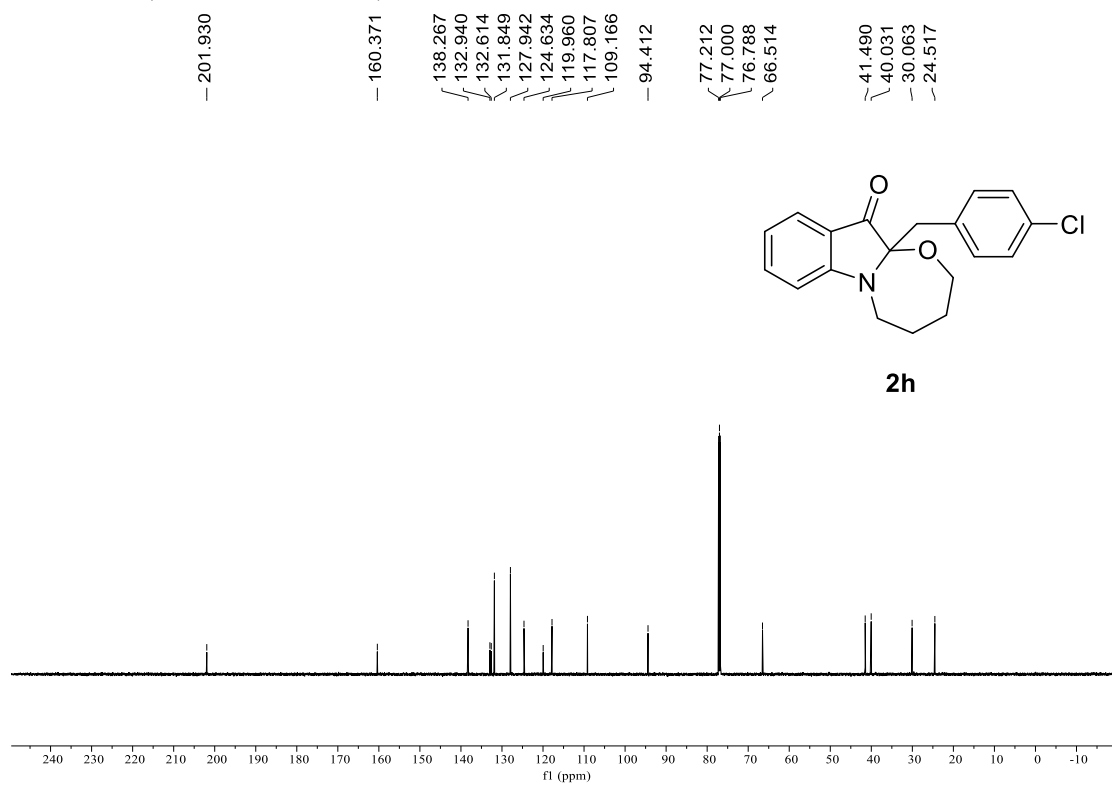

<sup>1</sup>H NMR (600 MHz, CDCl<sub>3</sub>)

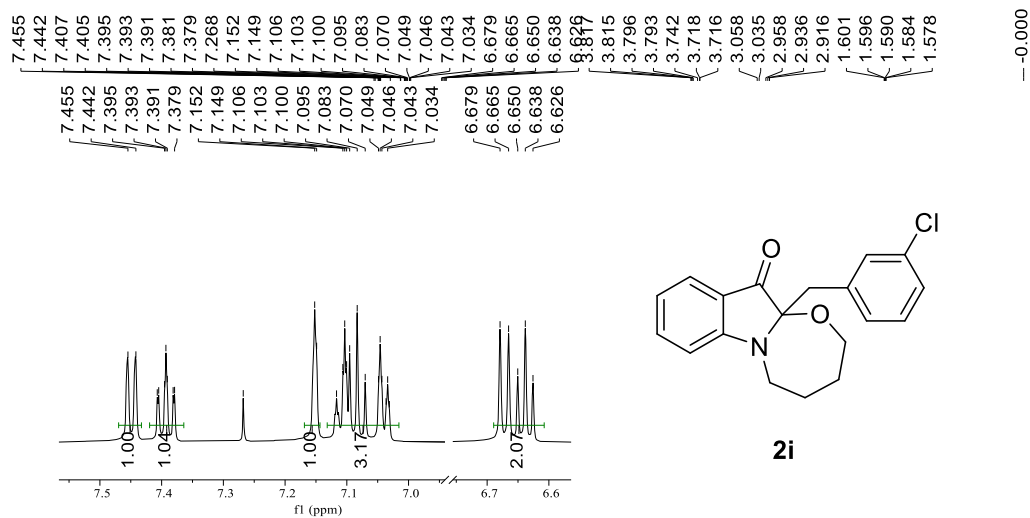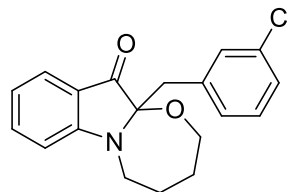

**2i**

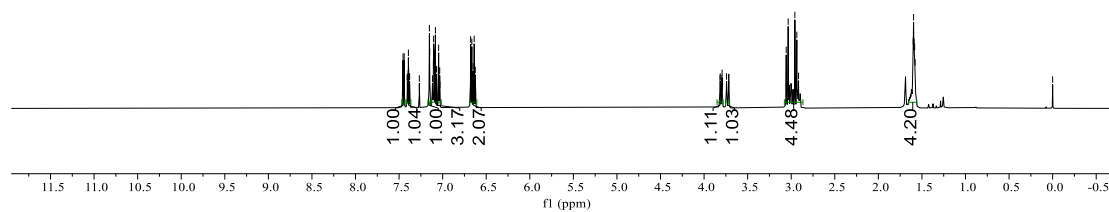

<sup>13</sup>C NMR (150 MHz, CDCl<sub>3</sub>)

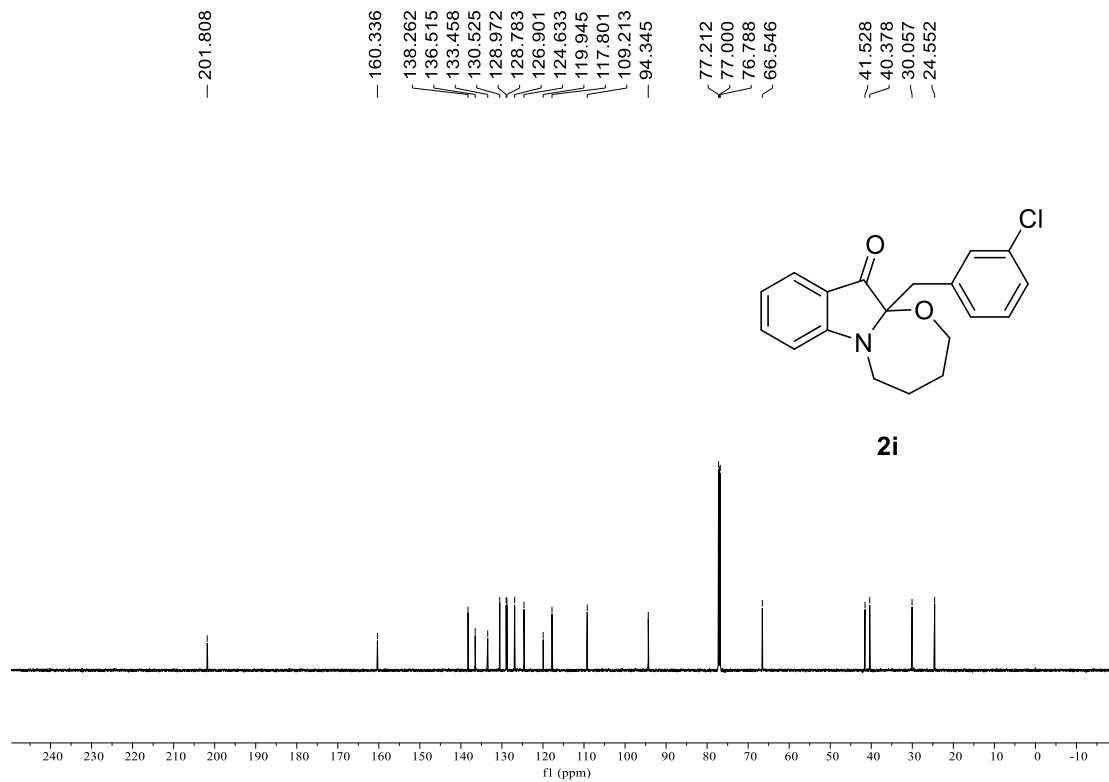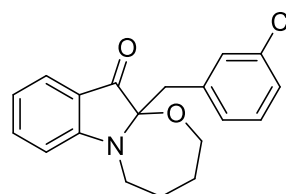

**2i**

<sup>1</sup>H NMR (500 MHz, CDCl<sub>3</sub>)

7.461, 7.458, 7.446, 7.443, 7.385, 7.382, 7.370, 7.368, 7.365, 7.354, 7.351, 7.290, 7.280, 7.271, 7.266, 7.245, 7.239, 7.236, 7.231, 7.226, 7.066, 7.064, 7.060, 7.055, 7.050, 7.046, 6.652, 6.636, 6.629, 6.614, 6.599, 3.824, 3.820, 3.804, 3.799, 3.795, 3.718, 3.689, 3.685, 3.337, 3.310, 3.228, 3.201, 3.107, 2.904, 2.893, 1.578, 1.574, 1.570, 1.567, -0.000

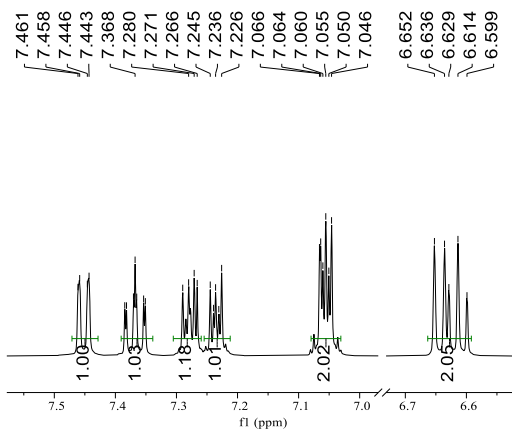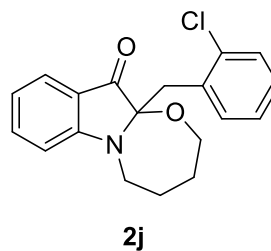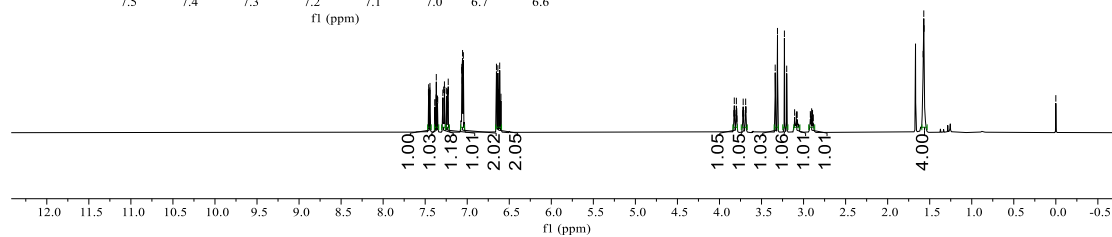

<sup>13</sup>C NMR (125 MHz, CDCl<sub>3</sub>)

202.456, 160.411, 138.191, 135.079, 133.041, 132.310, 129.171, 128.123, 126.127, 124.527, 119.995, 117.536, 109.284, 94.404, 77.254, 77.000, 76.746, 66.609, 41.948, 37.350, 30.076, 24.706

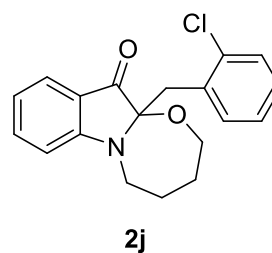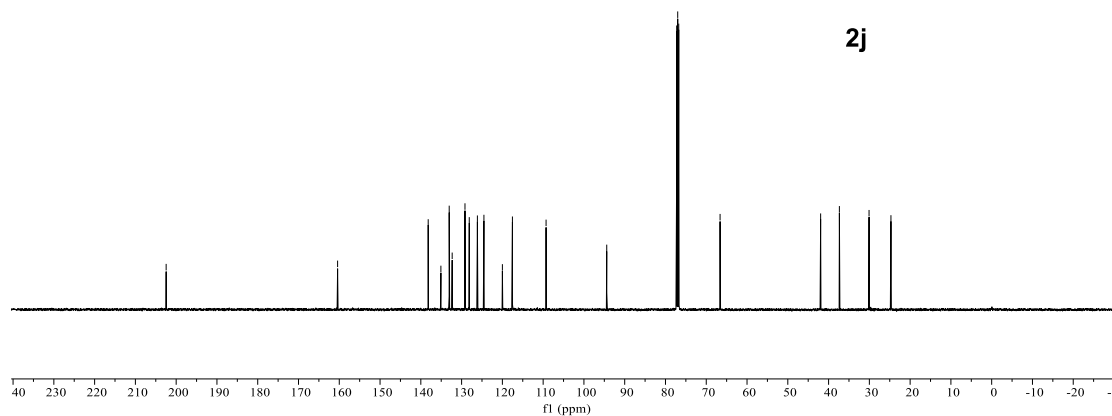

<sup>1</sup>H NMR (500 MHz, CDCl<sub>3</sub>)

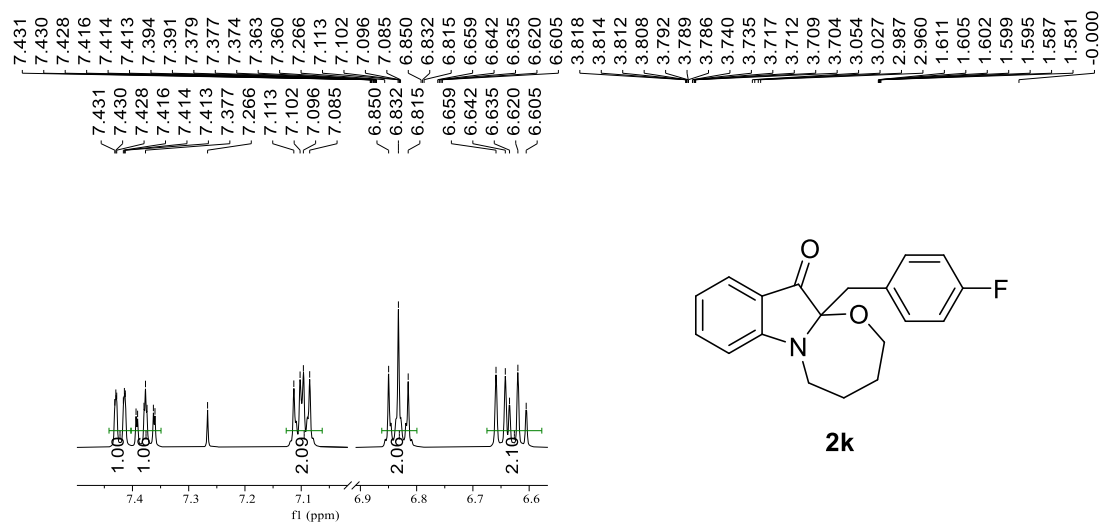

<sup>13</sup>C NMR (125 MHz, CDCl<sub>3</sub>)

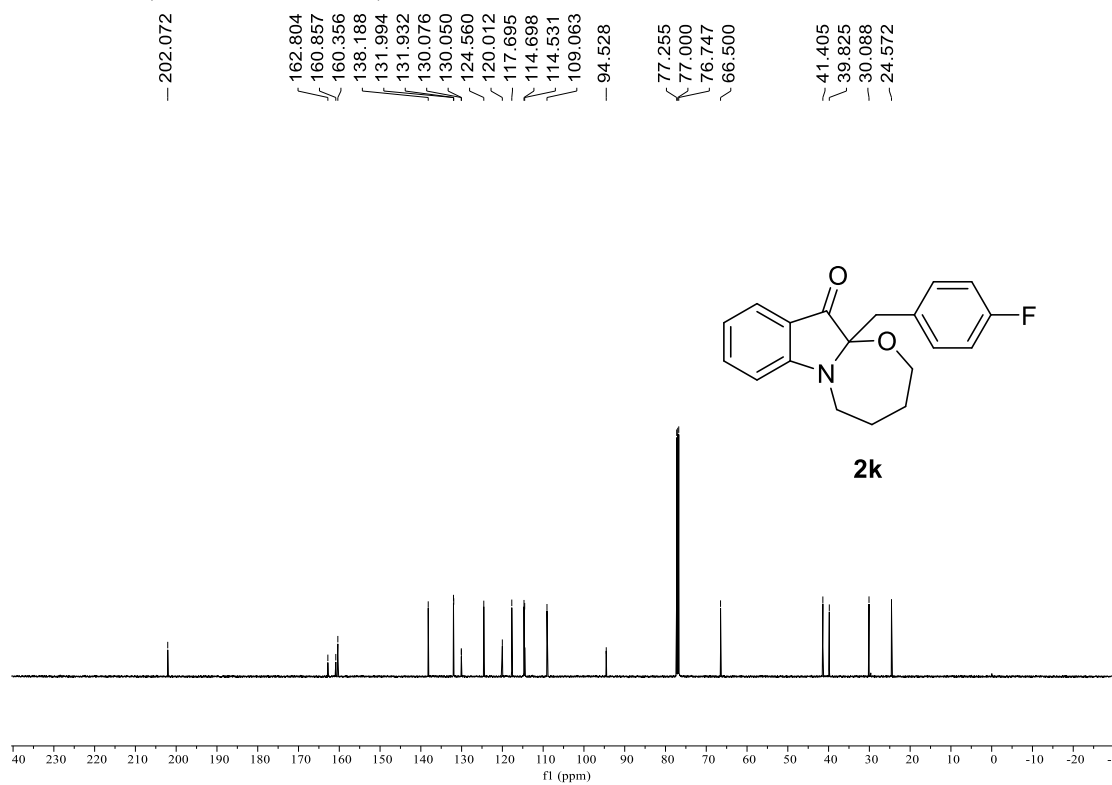

<sup>1</sup>H NMR (500 MHz, CDCl<sub>3</sub>)

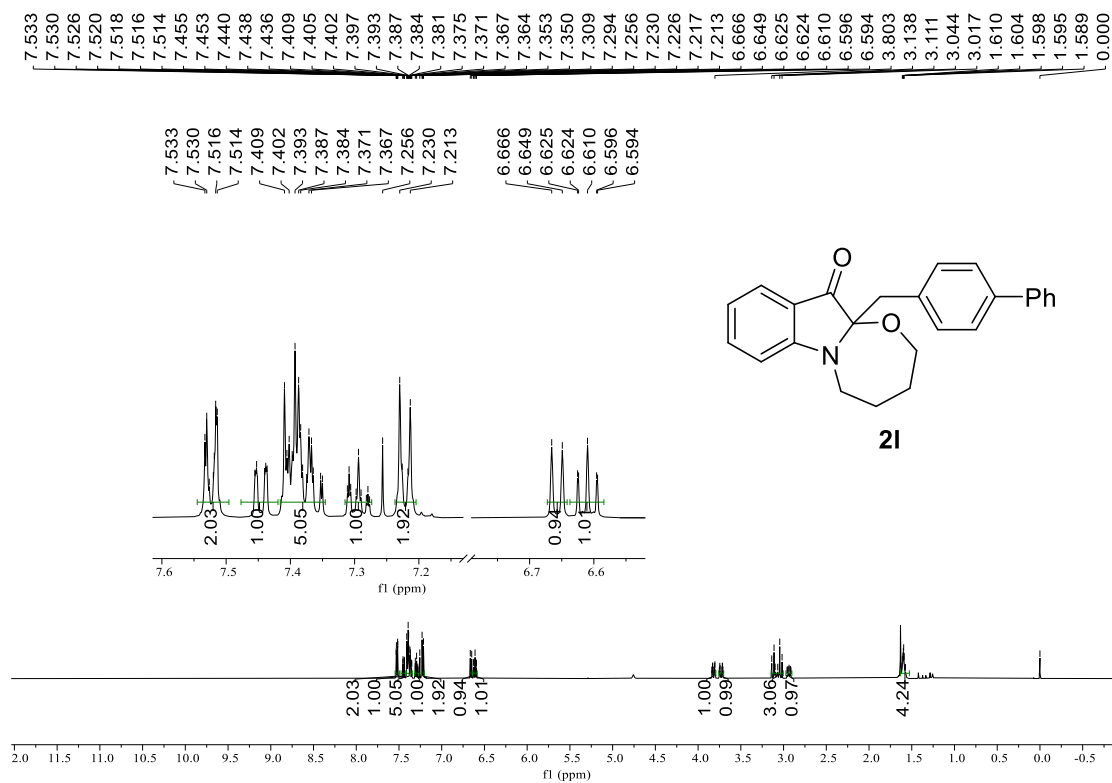

<sup>13</sup>C NMR (125 MHz, CDCl<sub>3</sub>)

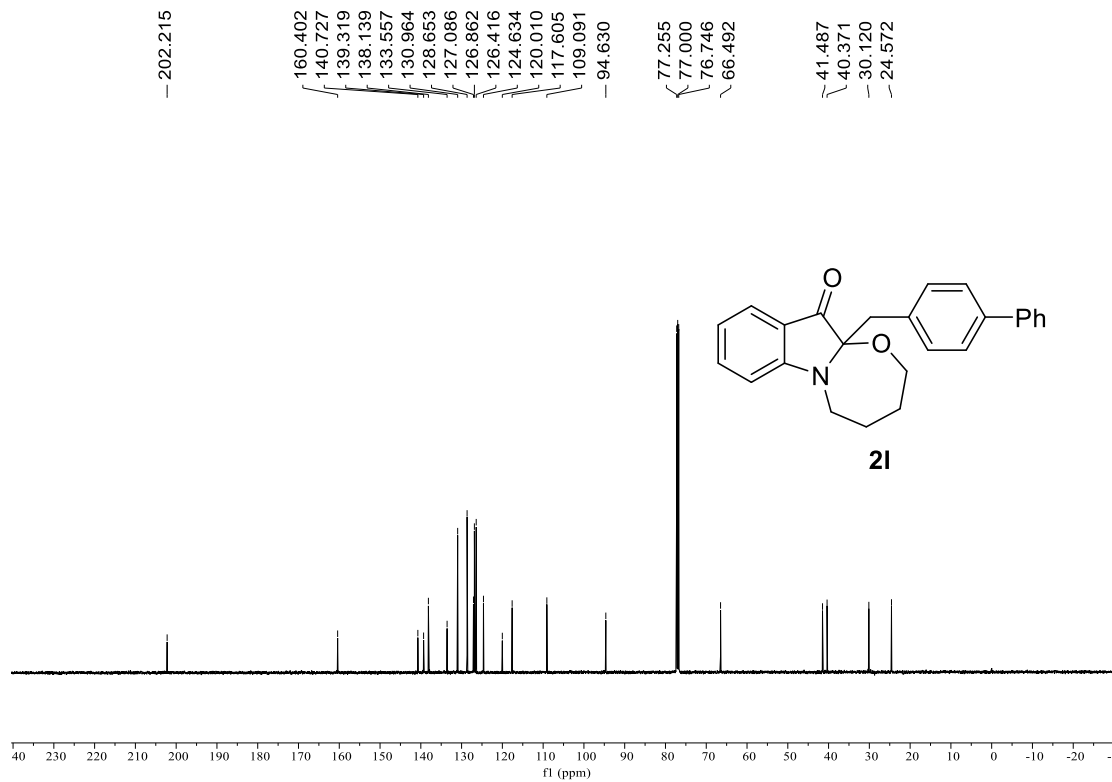

<sup>1</sup>H NMR (500 MHz, CDCl<sub>3</sub>)

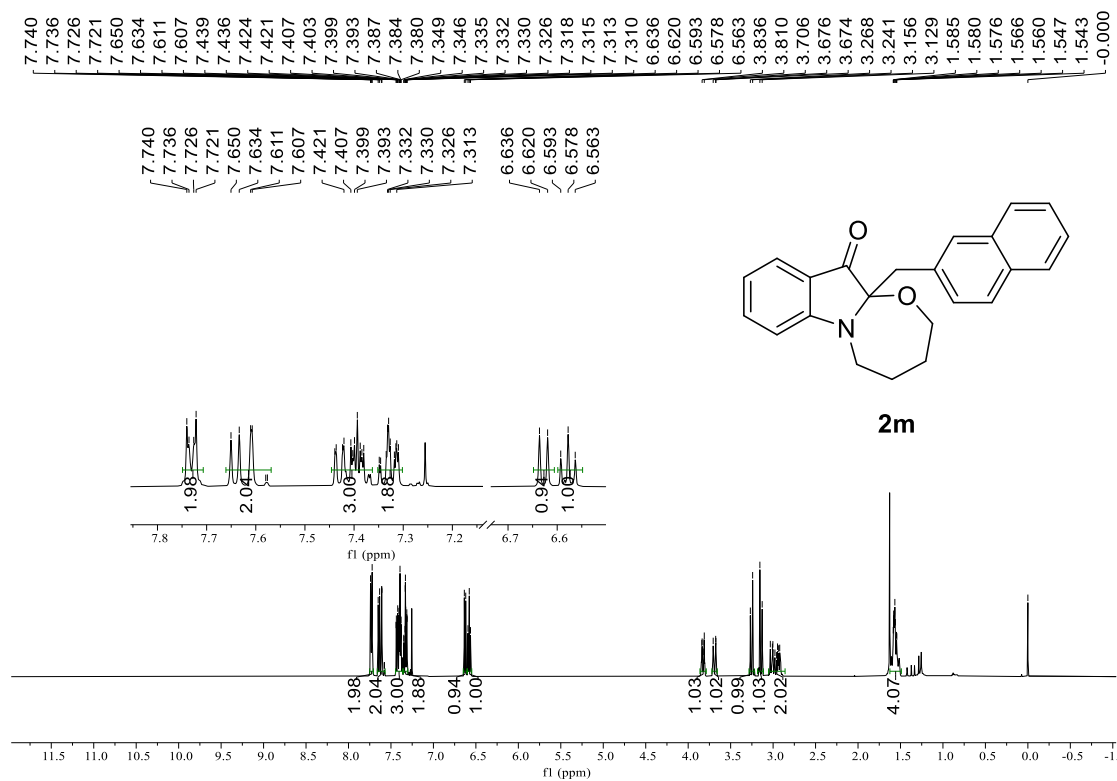

<sup>13</sup>C NMR (125 MHz, CDCl<sub>3</sub>)

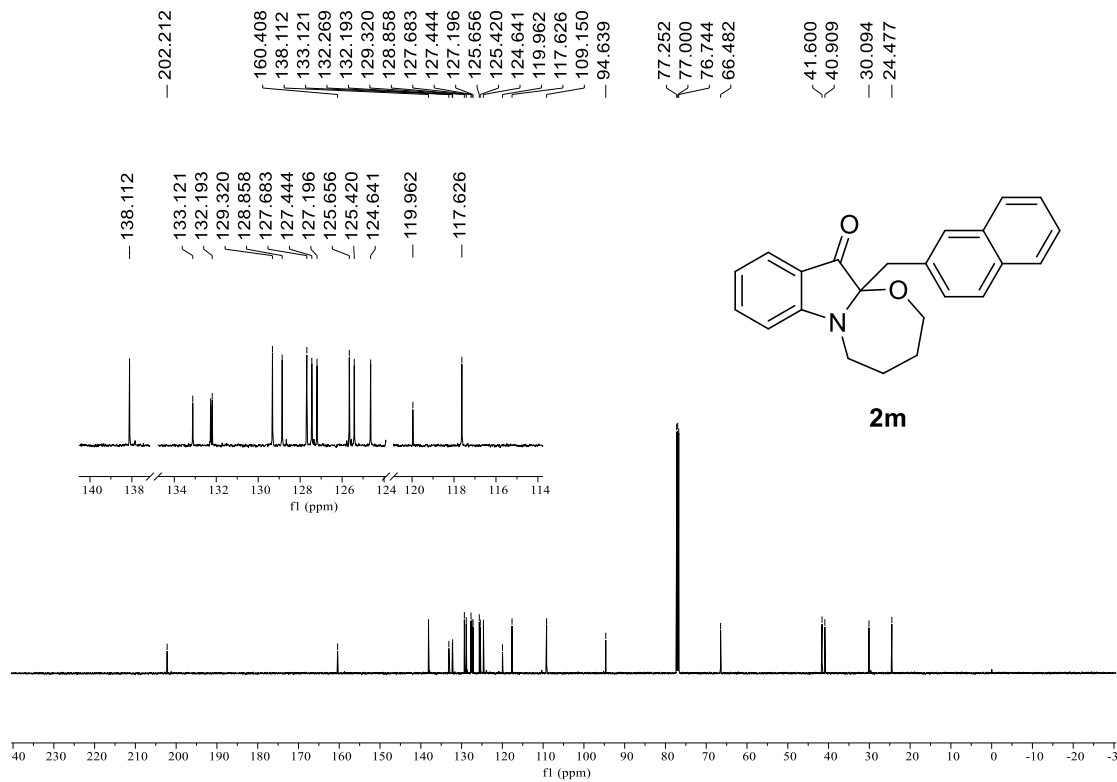



$^1\text{H}$  NMR (500 MHz,  $\text{CDCl}_3$ )

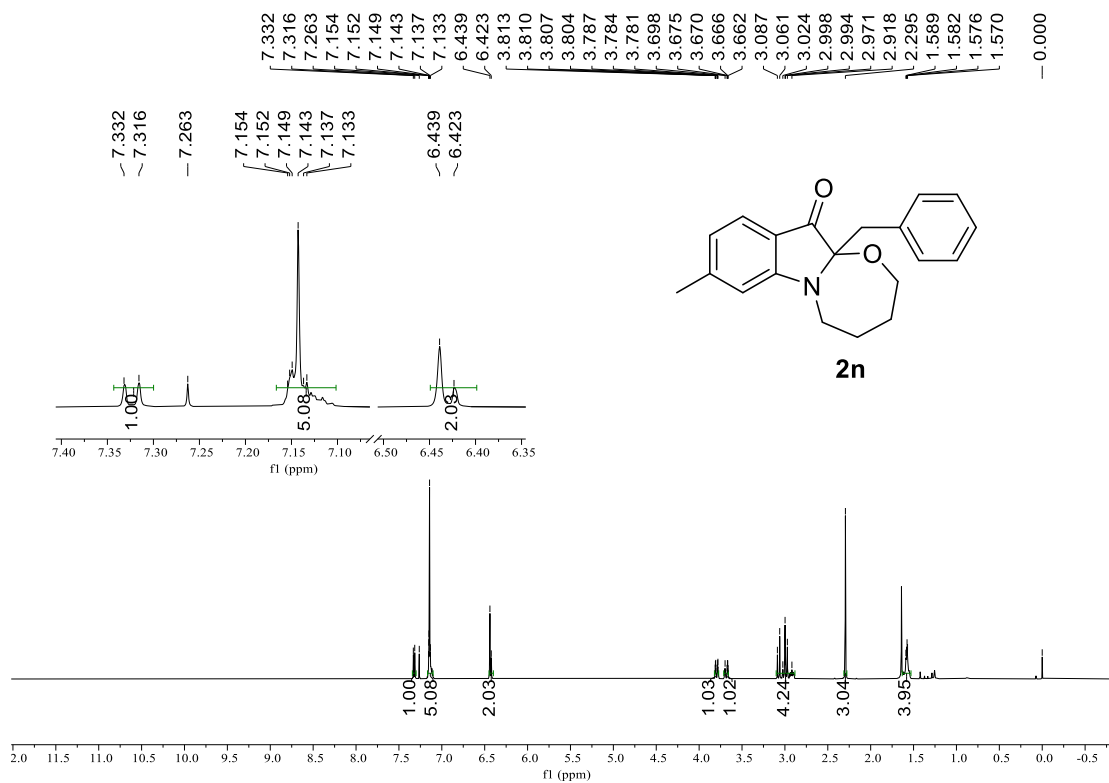

$^{13}\text{C}$  NMR (125 MHz,  $\text{CDCl}_3$ )

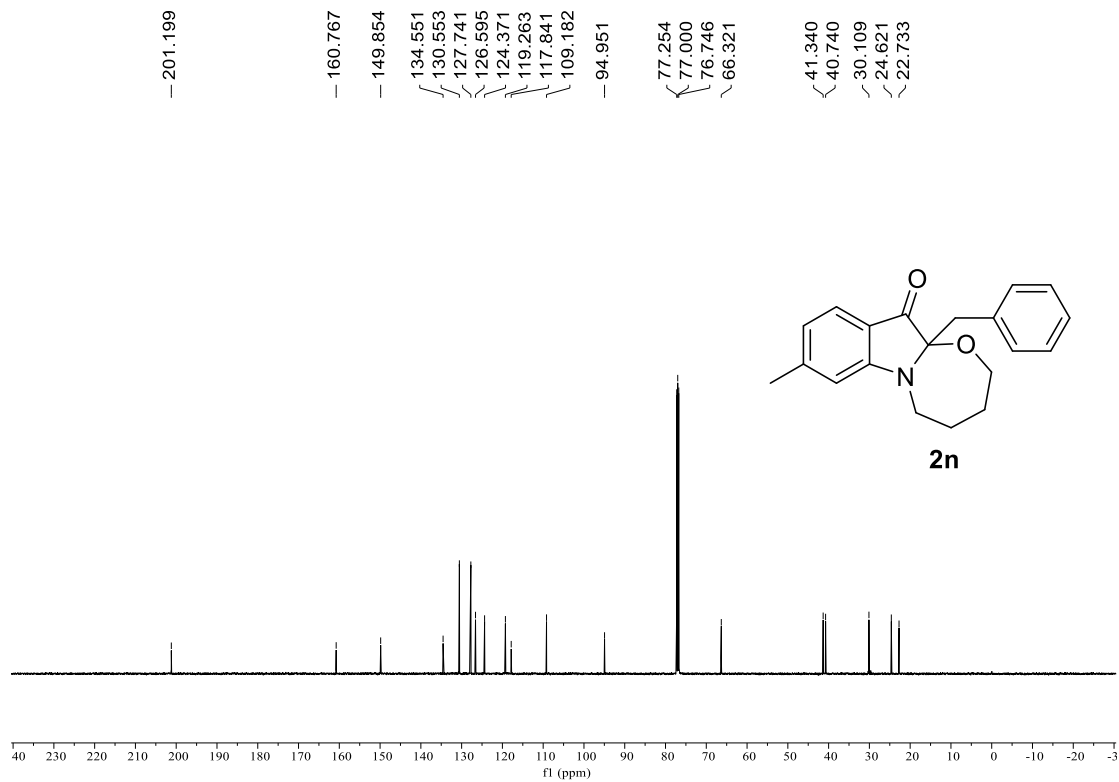

$^1\text{H}$  NMR (500 MHz,  $\text{CDCl}_3$ )

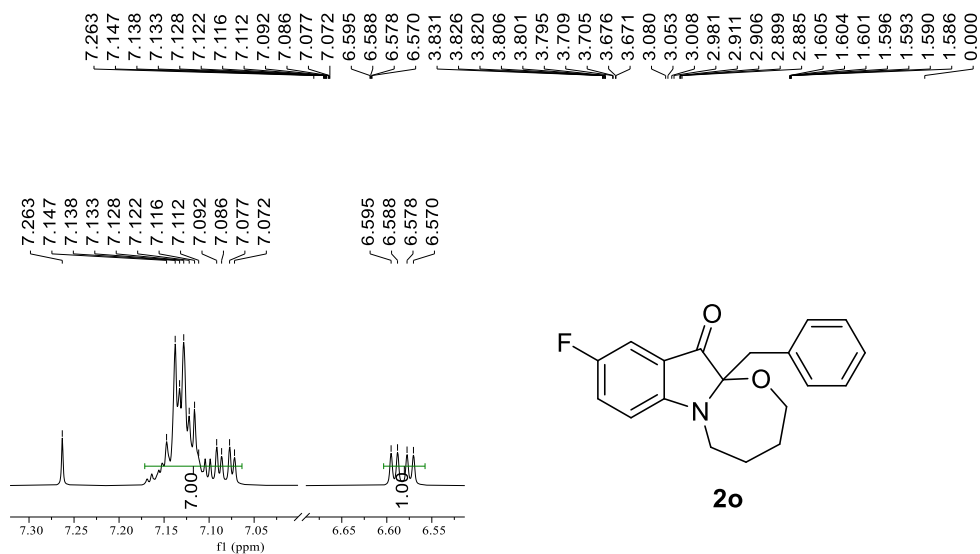

$^{13}\text{C}$  NMR (125 MHz,  $\text{CDCl}_3$ )

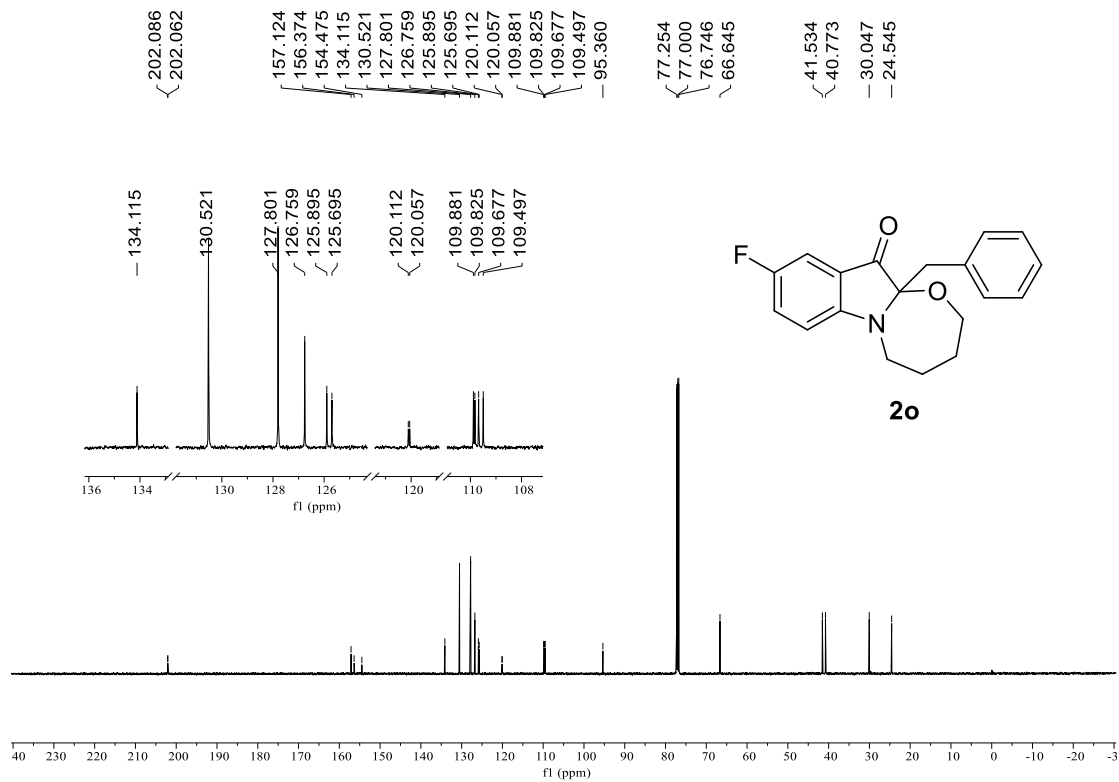

<sup>1</sup>H NMR (500 MHz, CDCl<sub>3</sub>)

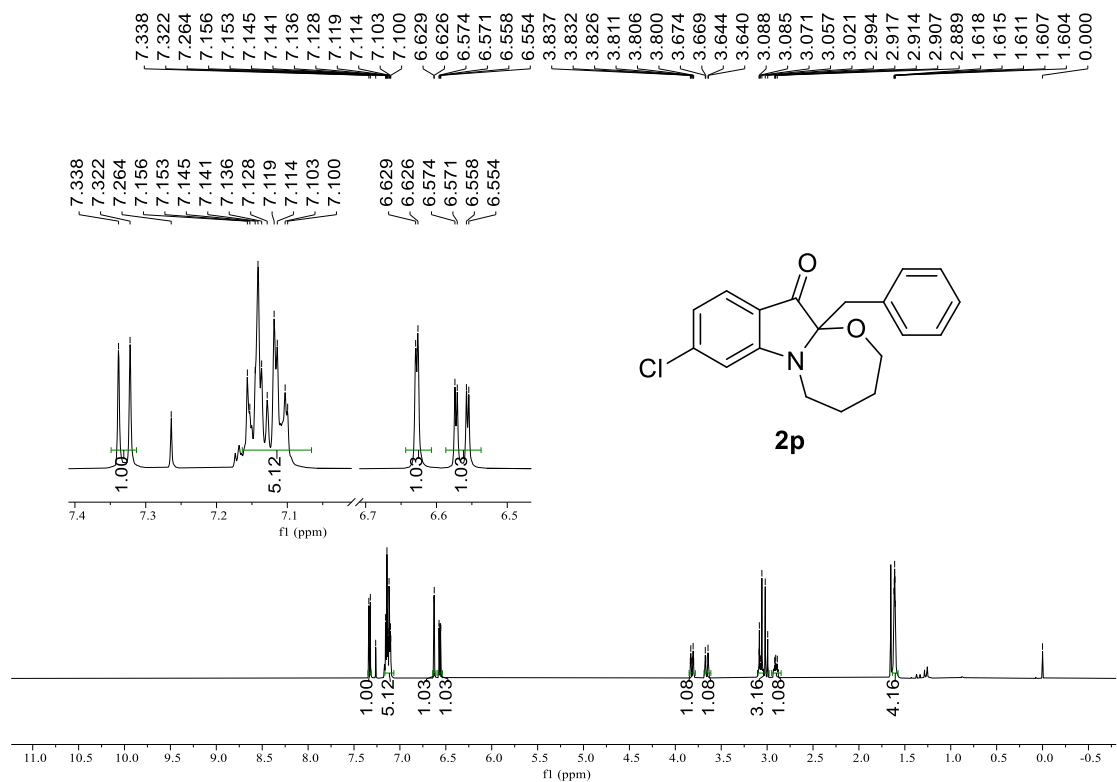

<sup>13</sup>C NMR (125 MHz, CDCl<sub>3</sub>)

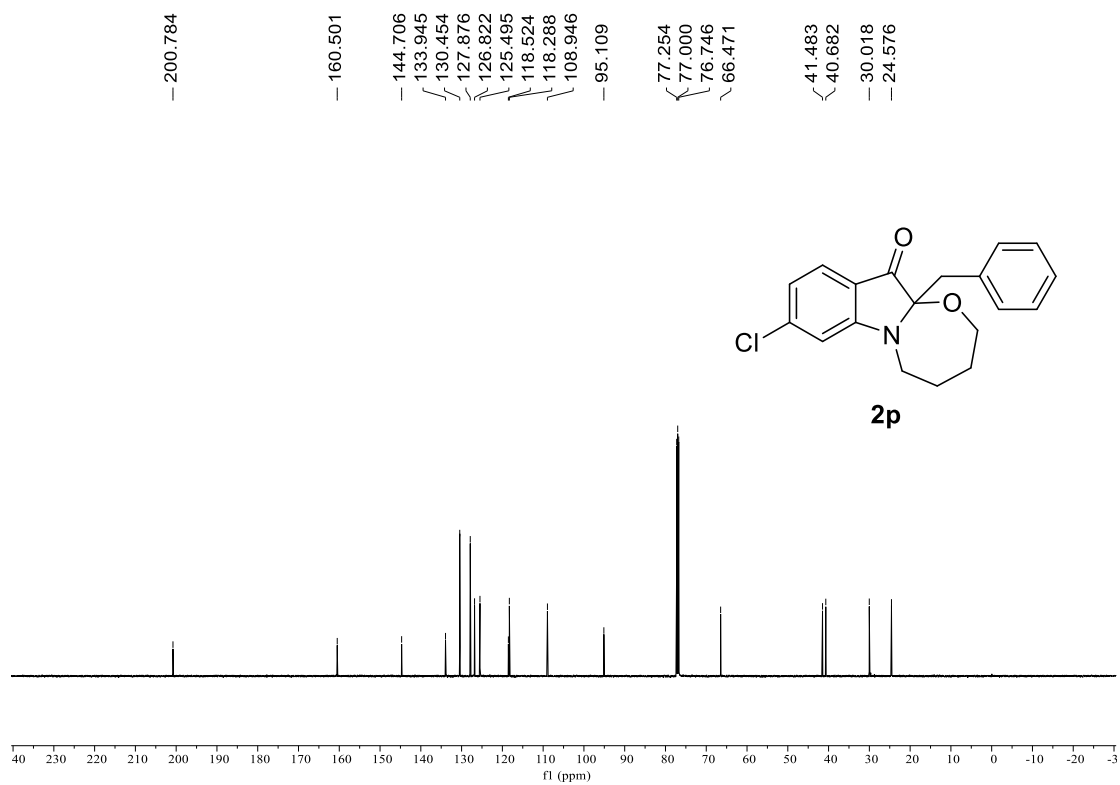

<sup>1</sup>H NMR (500 MHz, CDCl<sub>3</sub>)

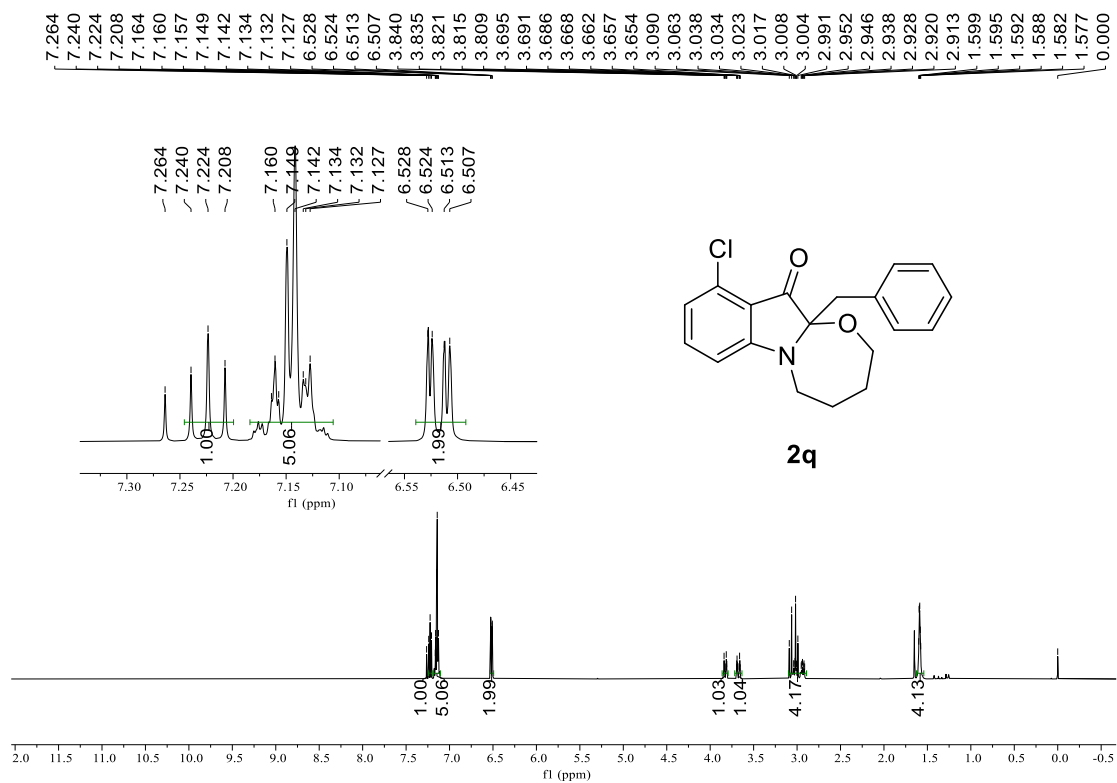

<sup>13</sup>C NMR (125 MHz, CDCl<sub>3</sub>)

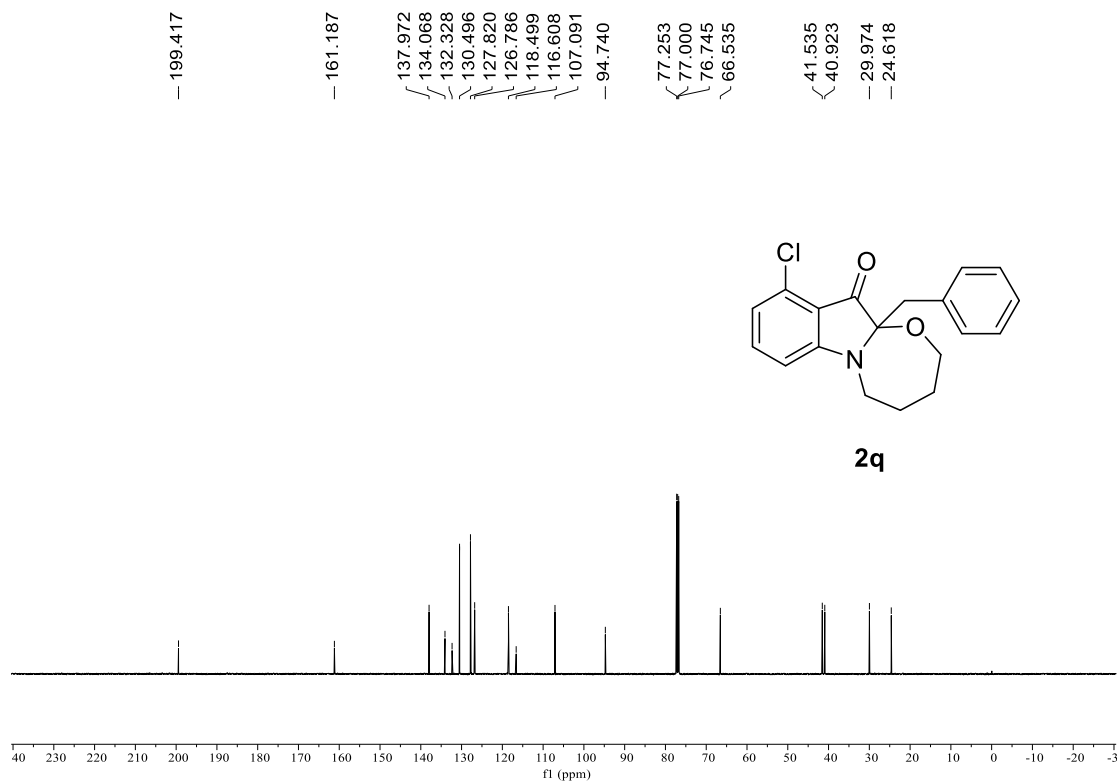

$^1\text{H}$  NMR (500 MHz,  $\text{CDCl}_3$ )

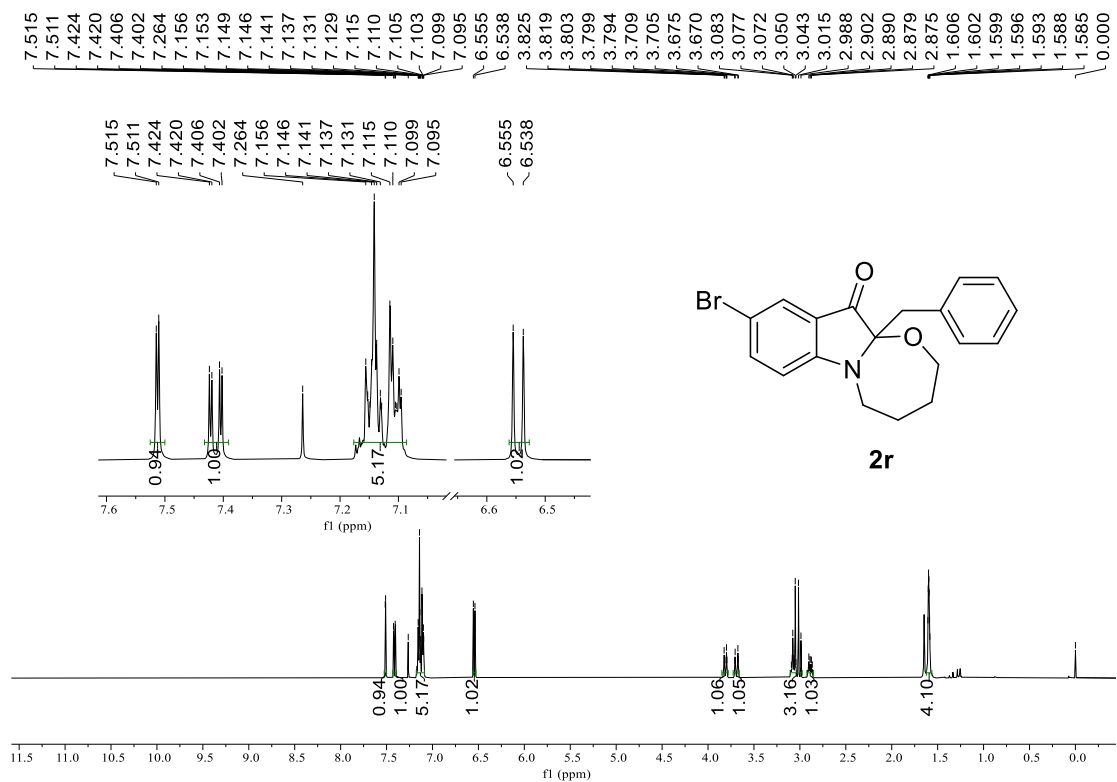

$^{13}\text{C}$  NMR (125 MHz,  $\text{CDCl}_3$ )

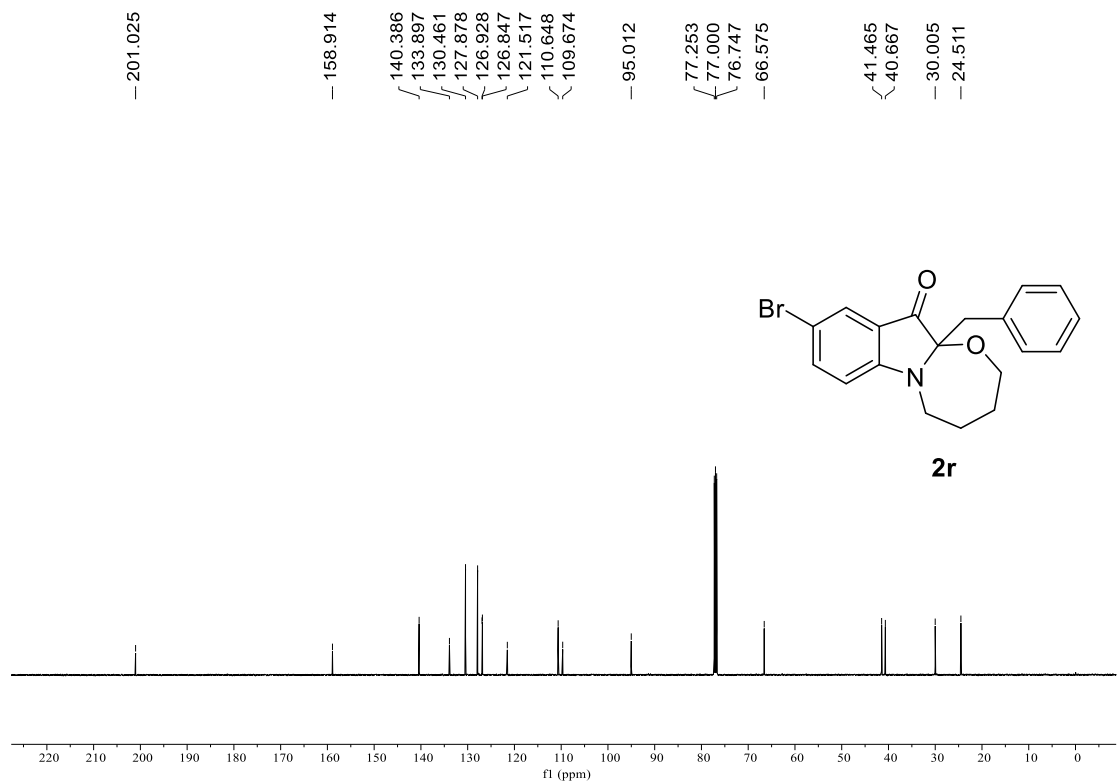

$^1\text{H}$  NMR (500 MHz,  $\text{CDCl}_3$ )

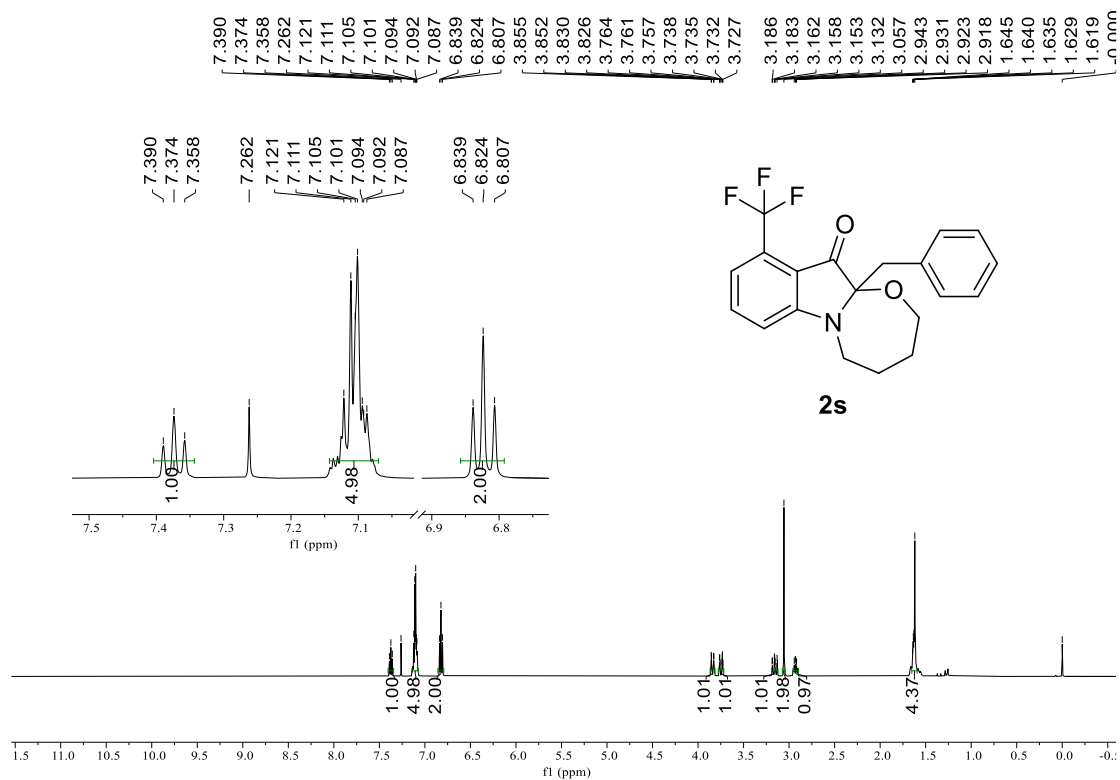

$^{13}\text{C}$  NMR (125 MHz,  $\text{CDCl}_3$ )

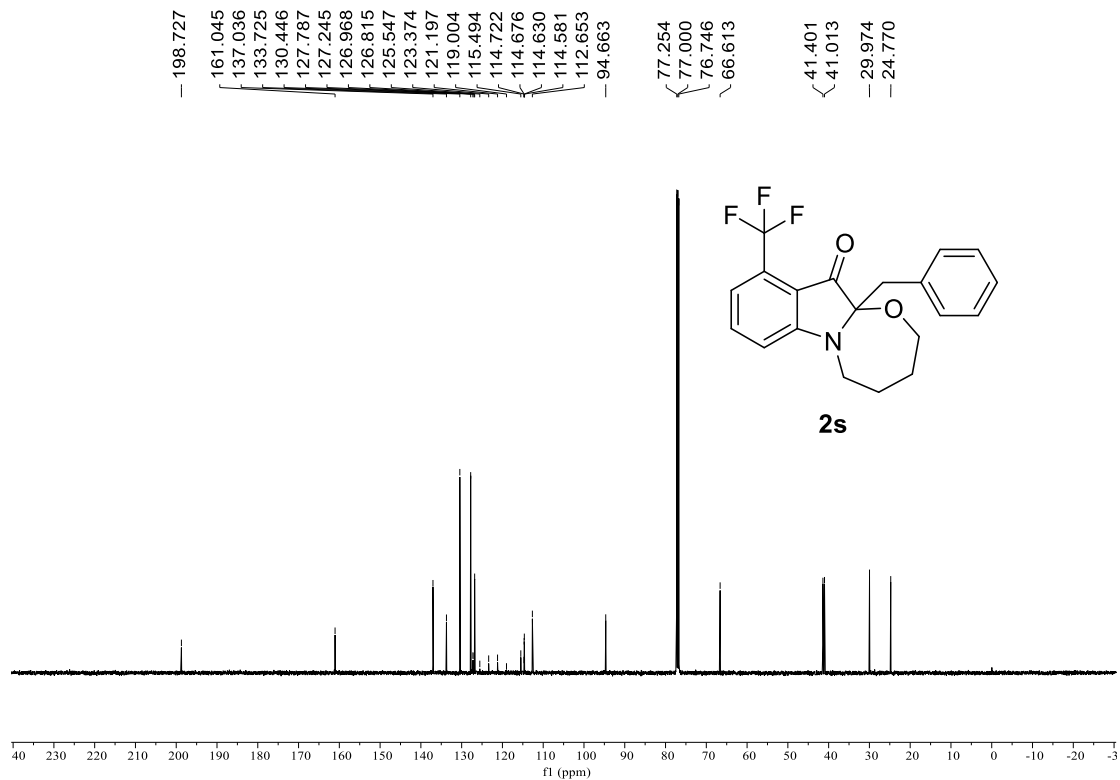

$^1\text{H}$  NMR (500 MHz,  $\text{CDCl}_3$ )

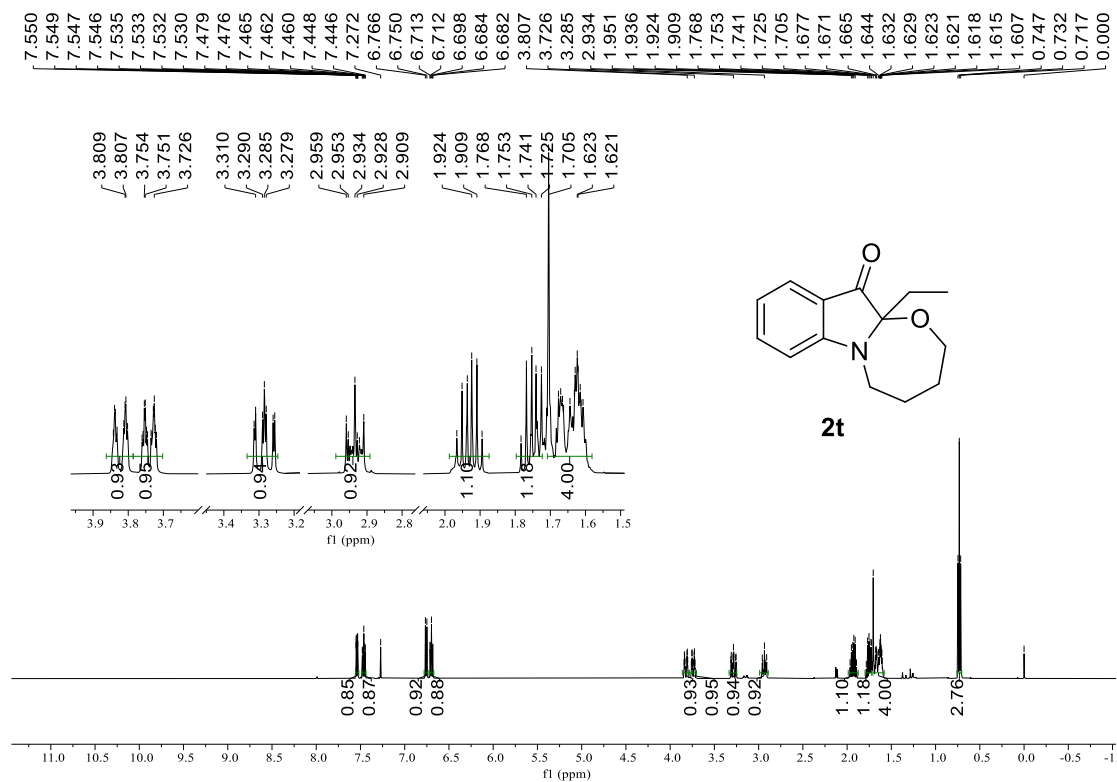

$^{13}\text{C}$  NMR (125 MHz,  $\text{CDCl}_3$ )

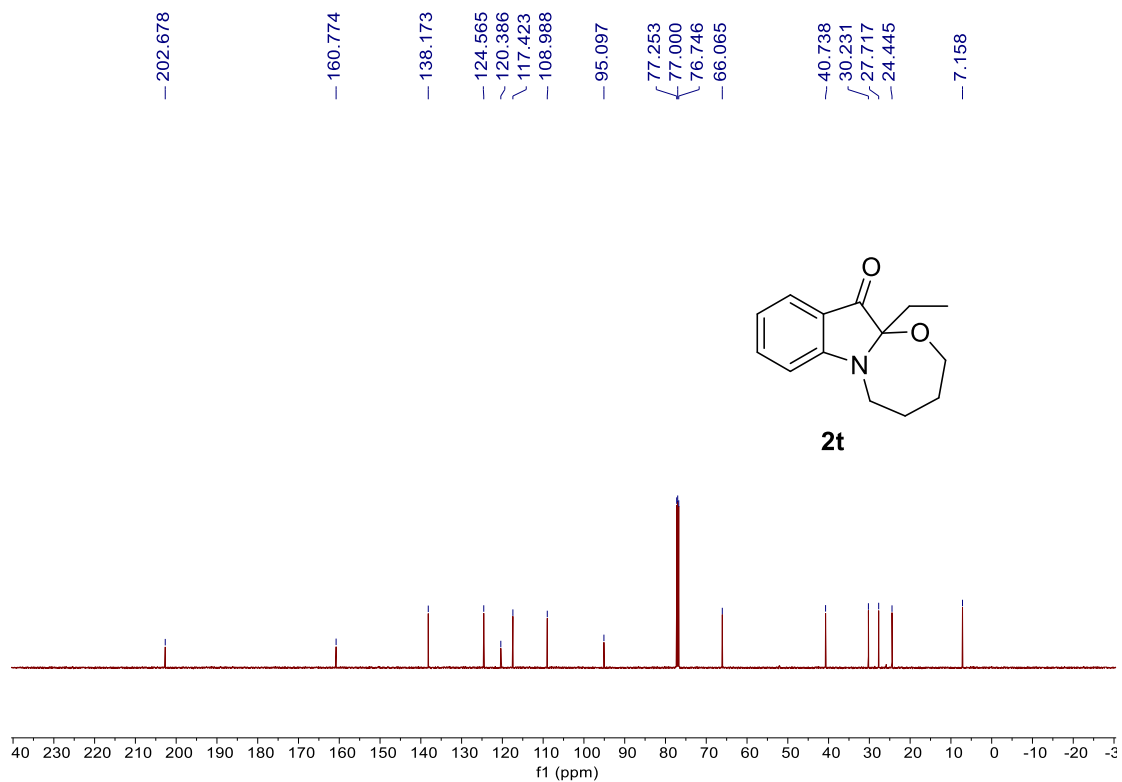

$^1\text{H}$  NMR (500 MHz,  $\text{CDCl}_3$ )

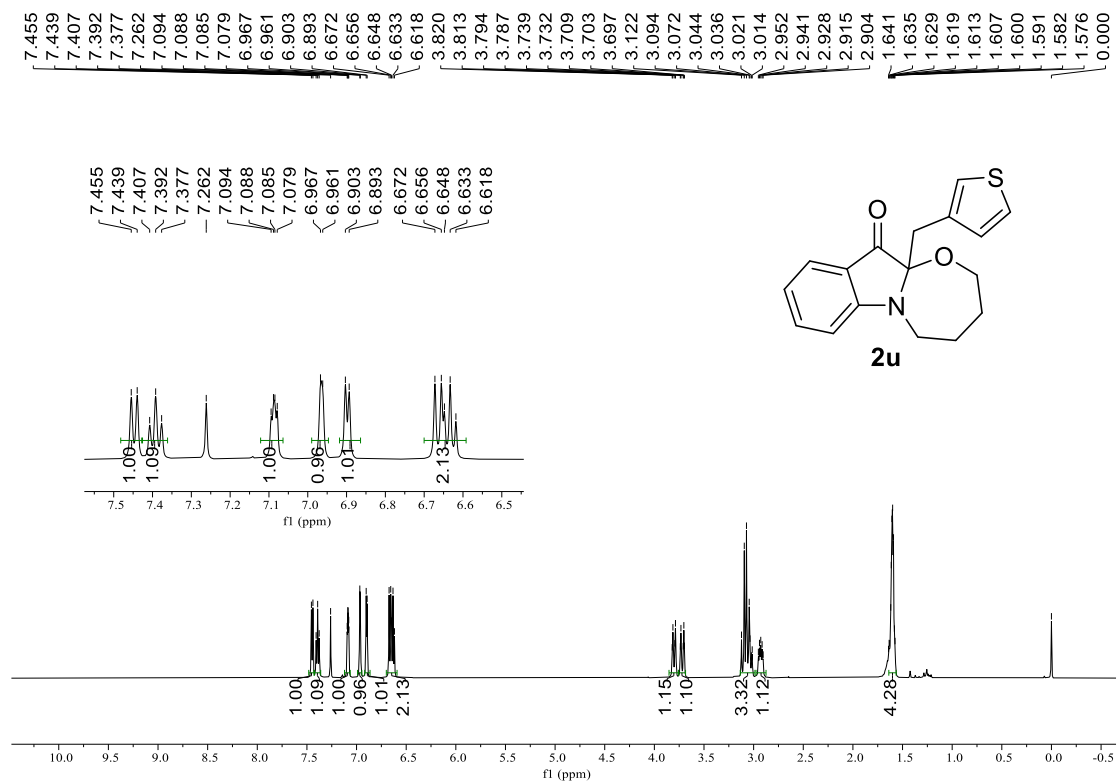

$^{13}\text{C}$  NMR (125 MHz,  $\text{CDCl}_3$ )

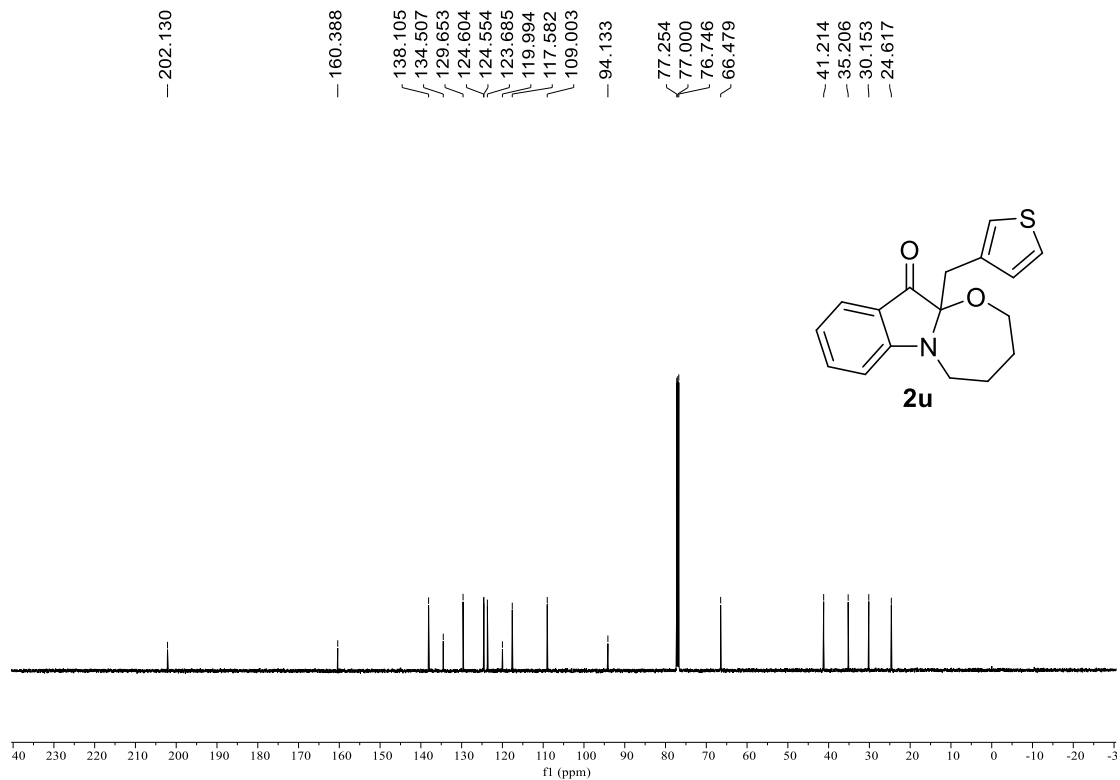



## 9. X-ray crystallography of compound 2a.

### *11a*-benzyl-2,3,4,5-tetrahydro-[1,3]oxazepino[3,2-*a*]indol-11(11*aH*)-one (2a, 2305869)

(Ortep ellipsoids are depicted at the 50% level)

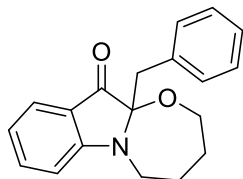

**Table S1. Crystal data and structure refinement for 2a.**

|                                   |                                                                                                    |
|-----------------------------------|----------------------------------------------------------------------------------------------------|
| Identification code               | <b>2a</b>                                                                                          |
| Empirical formula                 | C <sub>19</sub> H <sub>19</sub> NO <sub>2</sub>                                                    |
| Formula weight                    | 293.35                                                                                             |
| Temperature                       | 213(2) K                                                                                           |
| Wavelength                        | 0.71073 Å                                                                                          |
| Crystal system                    | Monoclinic                                                                                         |
| Space group                       | P 21/n                                                                                             |
| Unit cell dimensions              | a = 7.9979 (3) Å, α = 90°.<br>b = 14.3194 (5) Å, β = 91.7040 (10)°.<br>c = 13.4938 (4) Å, γ = 90°. |
| Volume                            | 1544.70(9) Å <sup>3</sup>                                                                          |
| Z                                 | 4                                                                                                  |
| Density (calculated)              | 1.261 Mg/m <sup>3</sup>                                                                            |
| Absorption coefficient            | 0.082 mm <sup>-1</sup>                                                                             |
| F(000)                            | 624                                                                                                |
| Crystal size                      | 0.160 x 0.130 x 0.100 mm <sup>3</sup>                                                              |
| Theta range for data collection   | 2.918 to 25.998°.                                                                                  |
| Index ranges                      | -9 ≤ h ≤ 7, -17 ≤ k ≤ 17, -16 ≤ l ≤ 16                                                             |
| Reflections collected             | 14655                                                                                              |
| Independent reflections           | 3028 [R(int) = 0.0436]                                                                             |
| Completeness to theta = 26.000°   | 99.6 %                                                                                             |
| Absorption correction             | Semi-empirical from equivalents                                                                    |
| Max. and min. transmission        | 0.7456 and 0.6535                                                                                  |
| Refinement method                 | Full-matrix least-squares on F <sup>2</sup>                                                        |
| Data / restraints / parameters    | 3028 / 0 / 200                                                                                     |
| Goodness-of-fit on F <sup>2</sup> | 1.061                                                                                              |
| Final R indices [I > 2σ(I)]       | R1 = 0.0423, wR2 = 0.0867                                                                          |
| R indices (all data)              | R1 = 0.0594, wR2 = 0.0957                                                                          |
| Extinction coefficient            | 0.029(4)                                                                                           |
| Largest diff. peak and hole       | 0.151 and -0.139 e.Å <sup>-3</sup>                                                                 |

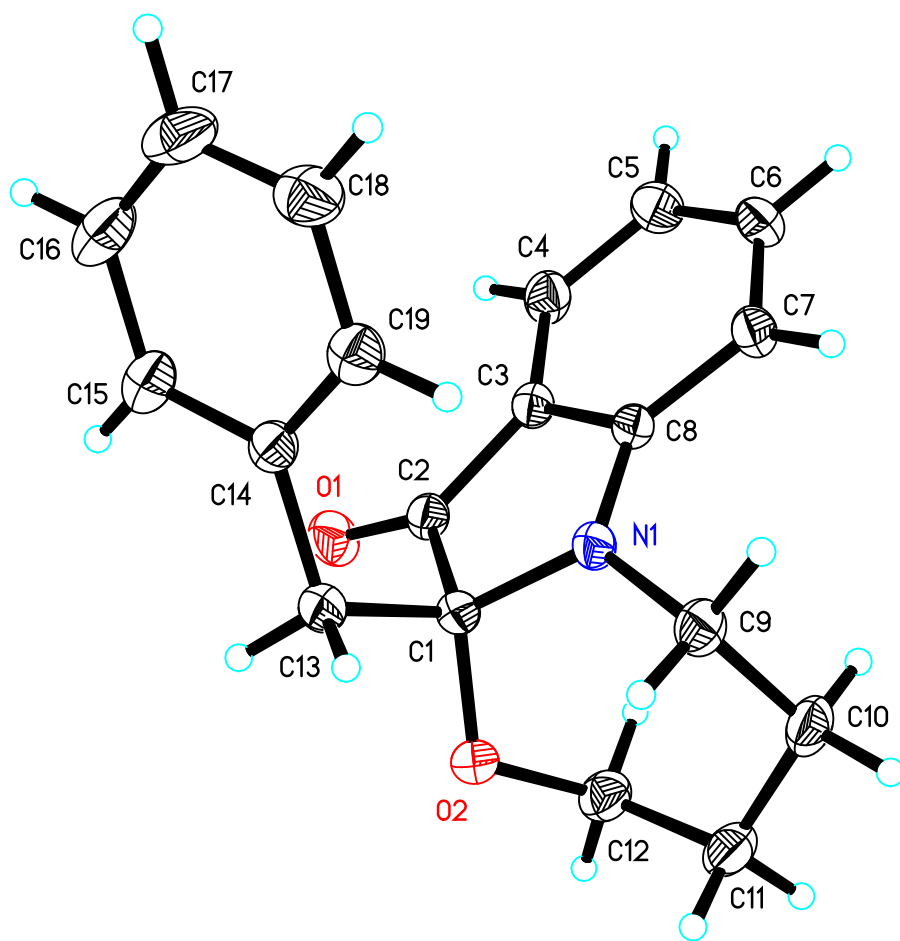

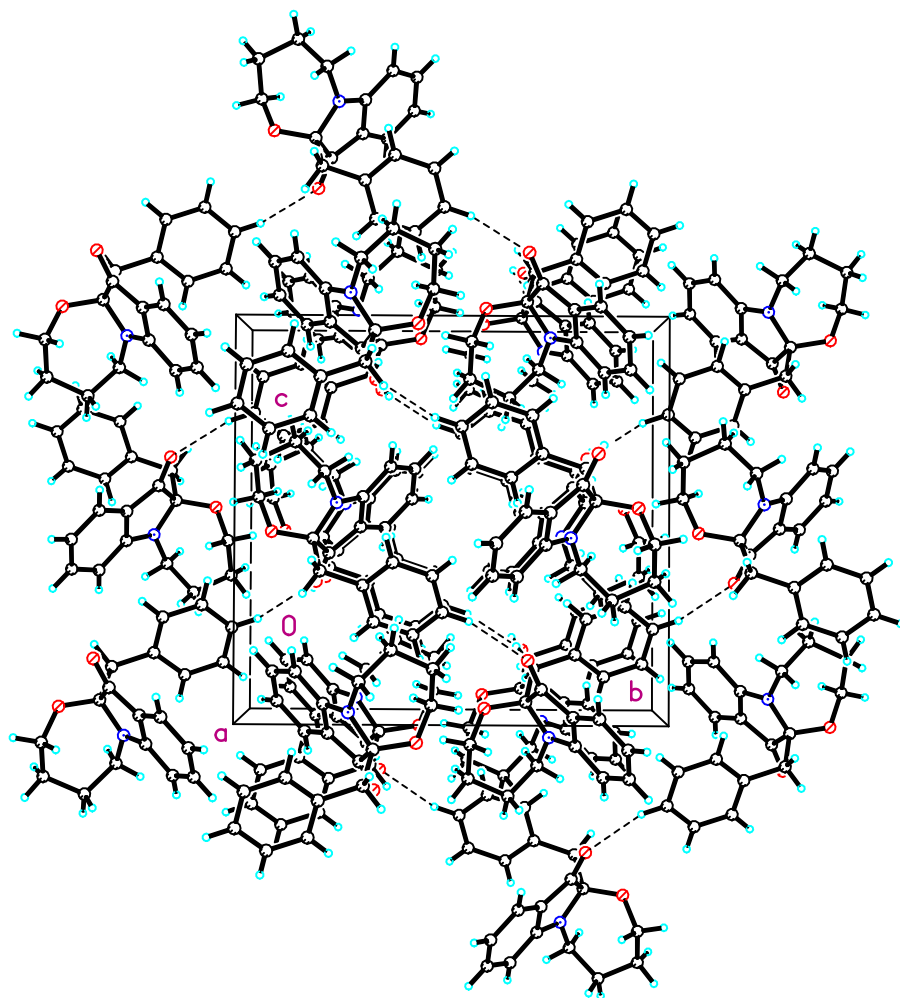

Supplement: d4qo00474d1.pdf [file d4qo00474d1.pdf]
